# Supplementary material for: Quantum Chemical Study Aimed at Modeling Efficient Aza-BODIPY NIR Dyes: Molecular and Electronic Structure, Absorption, and Emission Spectra
Source: MDPI journal article supplement (doi:10.3390/molecules25225361), 2020-11-17
Supplement: s1 [file s1]

# Quantum Chemical Study Aimed at Modeling Efficient Aza-BODIPY NIR Dyes: Molecular and Electronic Structure, Absorption, and Emission Spectra

Alexander E. Pogonin <sup>1,\*</sup>, Artyom Y. Shagurin <sup>2</sup>, Maria A. Savenkova <sup>1</sup>, Felix Yu. Telegin <sup>2</sup>, Yuriy S. Marfin <sup>2</sup> and Arthur S. Vashurin <sup>2</sup>

<sup>1</sup> Department of Nanomaterials and Ceramic Technology, Ivanovo State University of Chemistry and Technology, Sheremetevsky av., 7, 153000 Ivanovo, Russia; [mariasavenkova@bk.ru](mailto:mariasavenkova@bk.ru)

<sup>2</sup> Department of Inorganic Chemistry, Ivanovo State University of Chemistry and Technology, Sheremetevsky av., 7, 153000 Ivanovo, Russia; [Shagurin.A.Y@gmail.com](mailto:Shagurin.A.Y@gmail.com) (A.Y.S.); [f.telegin@mail.ru](mailto:f.telegin@mail.ru) (F.Y.T.); [marfin@isuct.ru](mailto:marfin@isuct.ru) (Y.S.M.); [vashurin@isuct.ru](mailto:vashurin@isuct.ru) (A.S.V.)

\* Correspondence: [pogonin@isuct.ru](mailto:pogonin@isuct.ru); Tel. +7-(4932)-359-874

**Figure S1.** Conformations of A1–A7 dyes according to the GFN2-XTB/CREST meta-dynamical calculations. Next to the molecules are Gibbs free energy values relative to the lowest conformer.

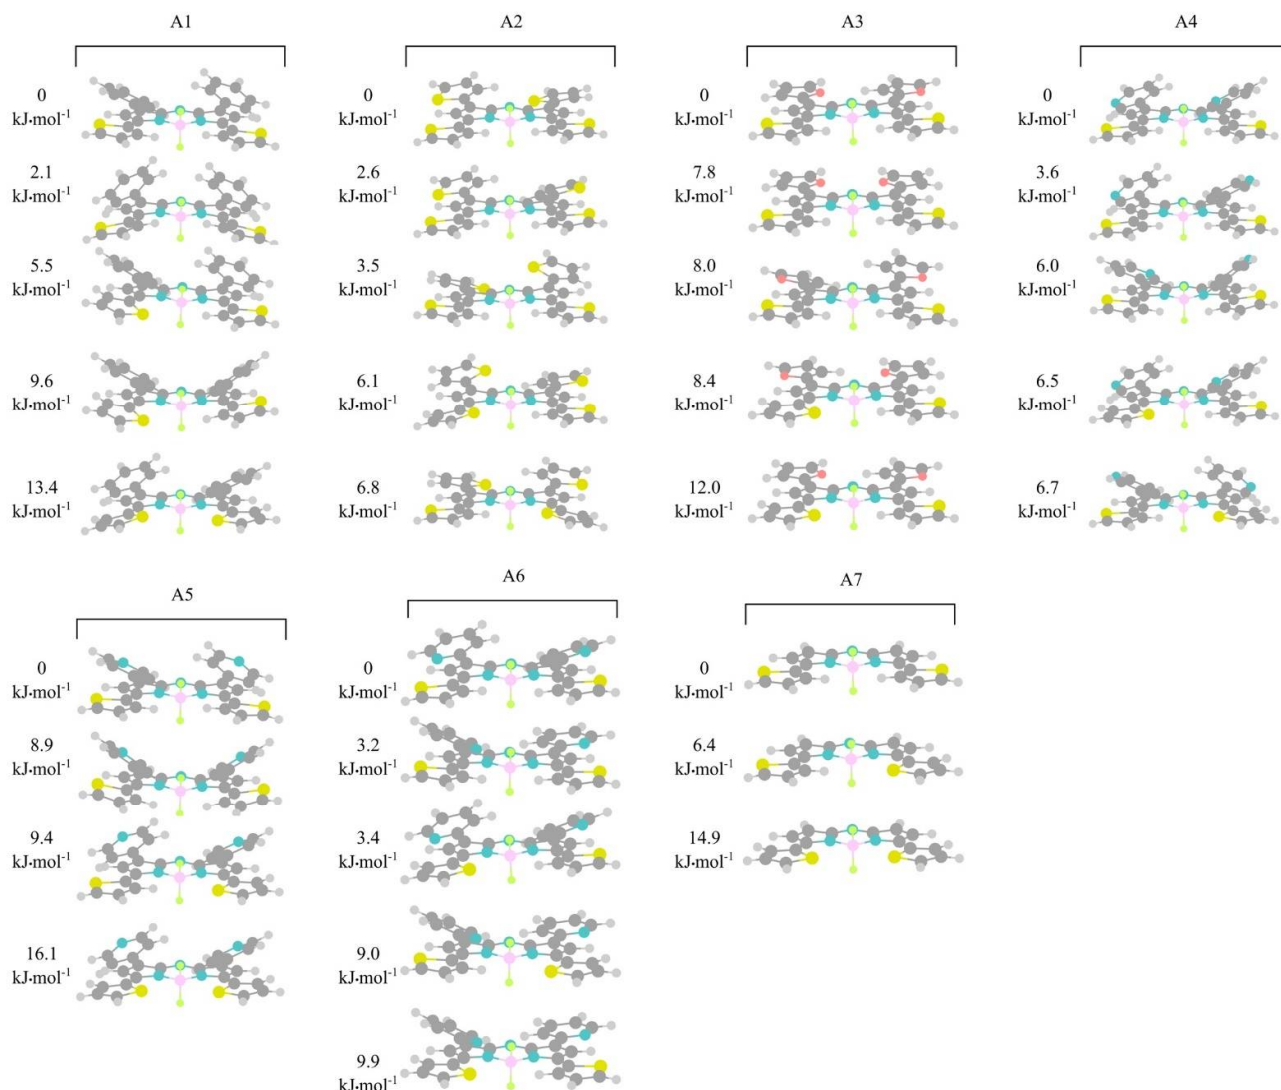

**Figure S2.** Conformations of **B1–B7** dyes according to the GFN2-XTB/CREST meta-dynamical calculations. Next to the molecules are Gibbs free energy values relative to the lowest conformer.

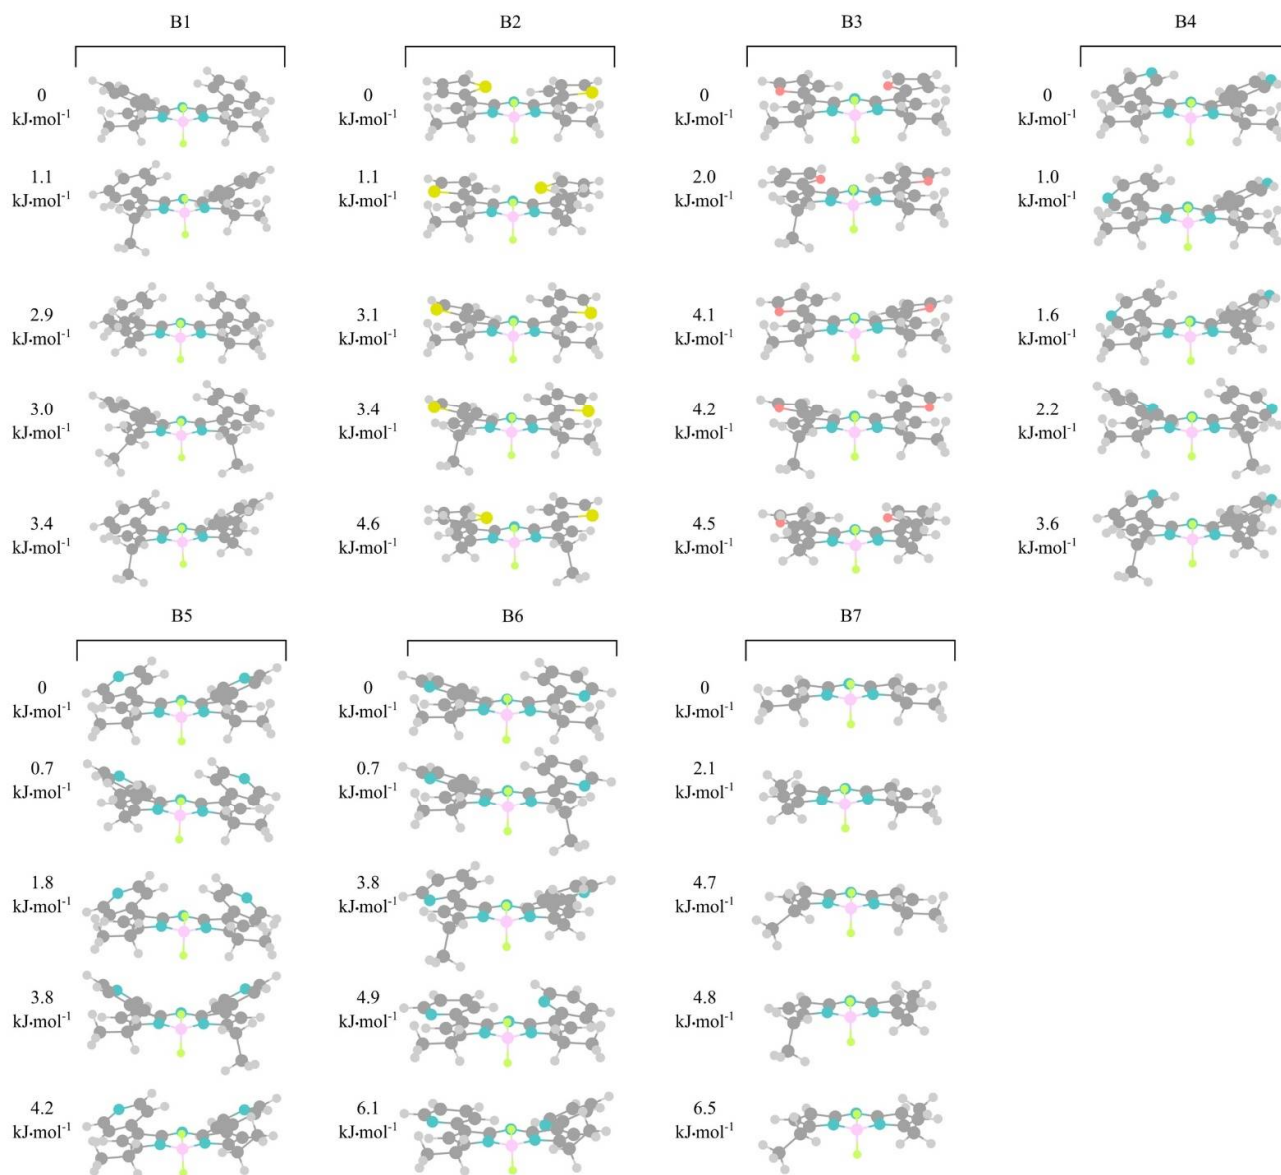

**Figure S3.** Conformations of **C1–C7** dyes according to the GFN2-XTB/CREST meta-dynamical calculations. Next to the molecules are Gibbs free energy values relative to the lowest conformer.

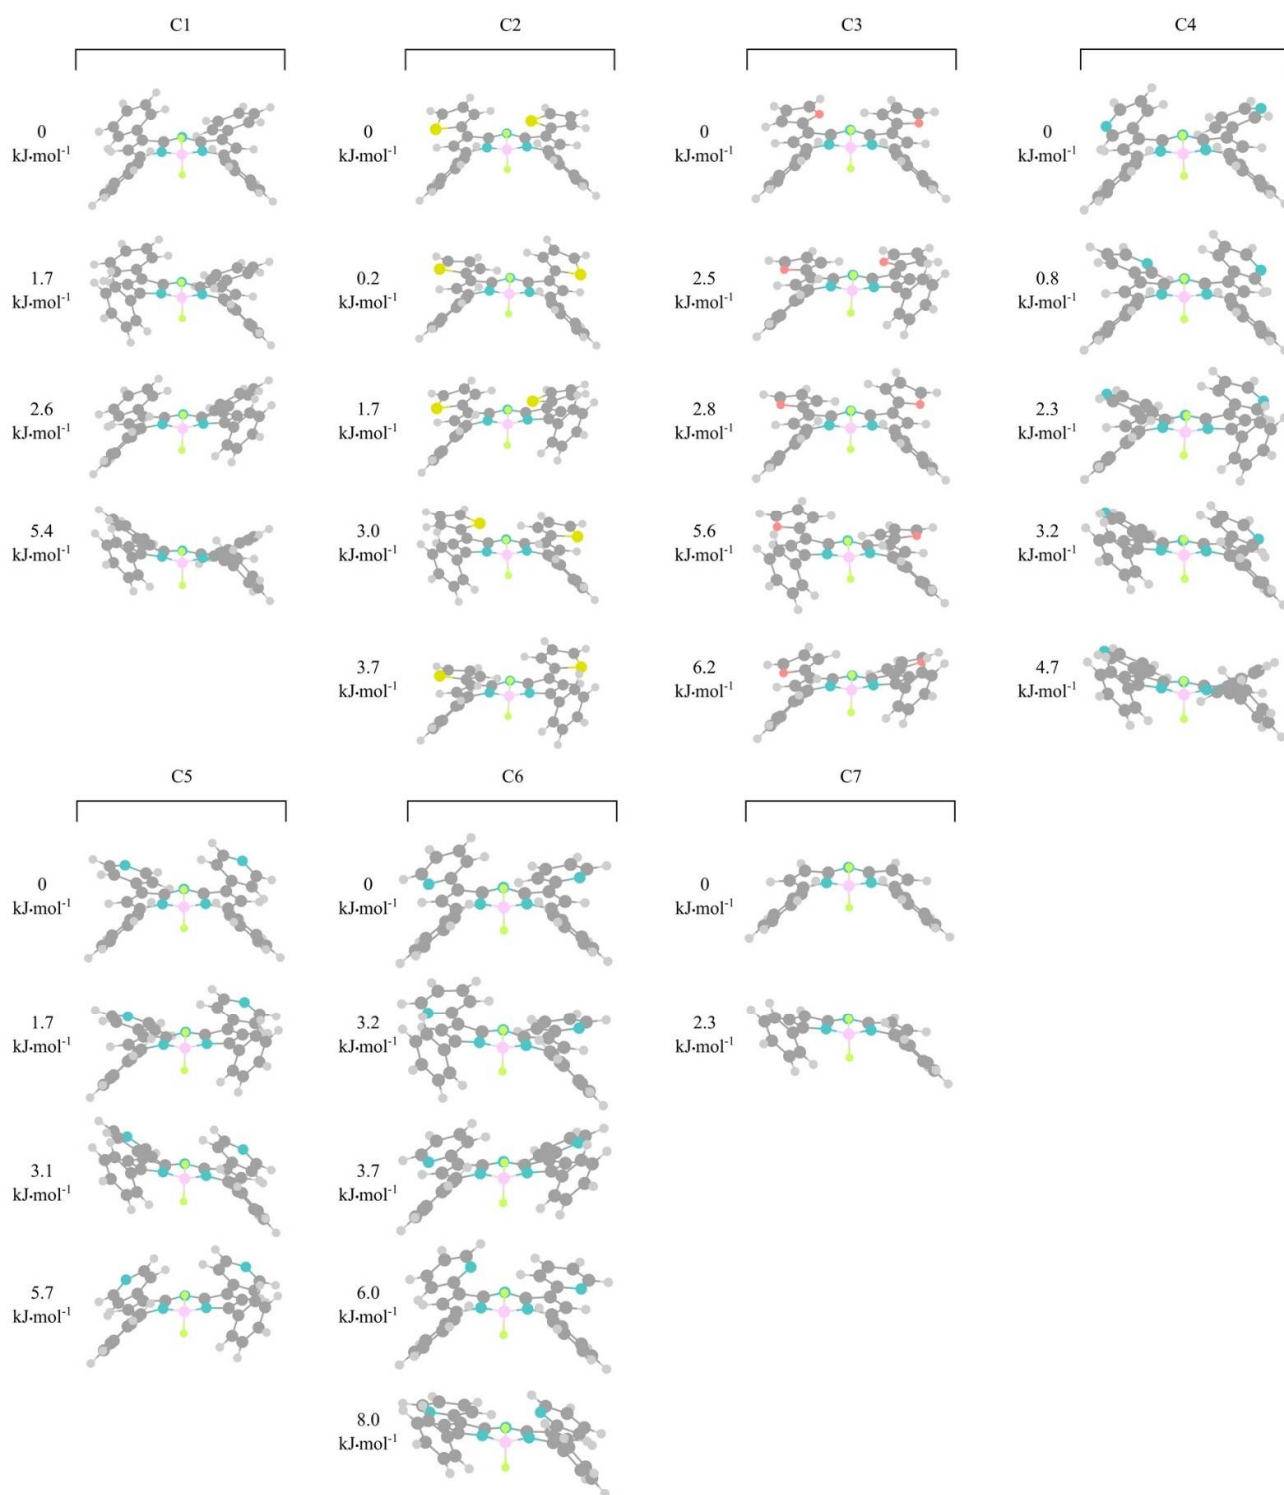

**Figure S4.** Conformations of **D1–D7** dyes according to the GFN2-XTB/CREST meta-dynamical calculations. Next to the molecules are Gibbs free energy values relative to the lowest conformer.

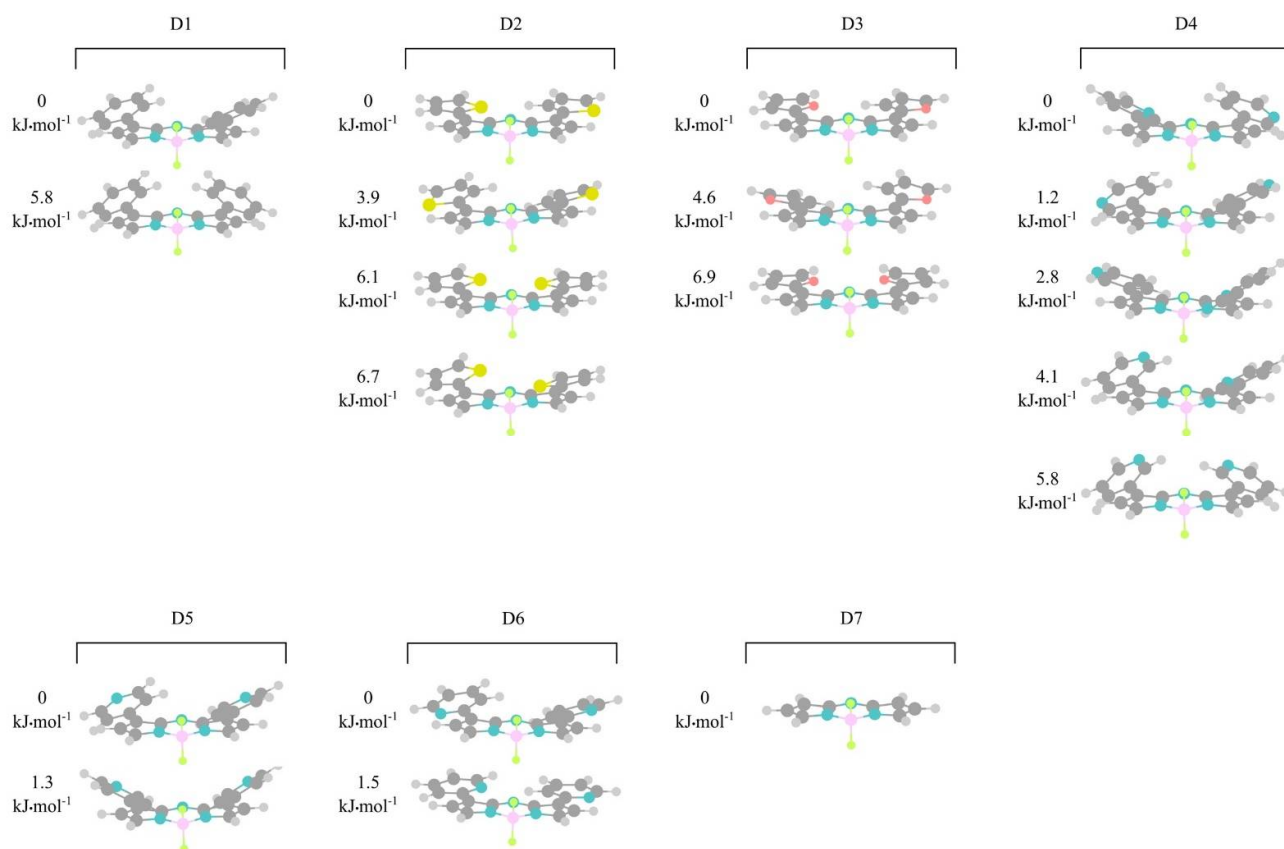

**Table S1.** Molecular parameters<sup>a</sup> of **A1-7** optimized at CAM-B3LYP/6-31+G(d,p) level.

|                                                          | <b>A1</b>      | <b>A2</b>         | <b>A3</b>      | <b>A4</b>      | <b>A5</b>      | <b>A6</b>      | <b>A7</b>      |
|----------------------------------------------------------|----------------|-------------------|----------------|----------------|----------------|----------------|----------------|
| Symmetry                                                 | C <sub>2</sub> | C <sub>1</sub>    | C <sub>2</sub> |
| $ \chi(\text{N}_{4a}\text{-B-N}_{4b}\text{-N}_8) $       | 0.0            | 0.1               | 0.0            | 0.0            | 0.0            | 0.0            | 0.0            |
| $ \chi(\text{C}_2\text{-C}_1\text{-C}_{8a}\text{-C}_m) $ | 175.2          | 175.5             | 175.6          | 175.7          | 175.8          | 175.4          | 178.2          |
| $ \chi(\text{C}_3\text{-N}_{4a}\text{-B-N}_{4b}) $       | 175.4          | 175.7             | 176.3          | 175.7          | 175.7          | 175.7          | 176.6          |
| $ \chi_1 = \chi_2 $ <sup>b</sup>                         | 30.5           | 16.2 <sup>b</sup> | 9.4            | 30.5           | 29.4           | 18.0           | -              |
| $ \chi_3 = \chi_4 $                                      | 17.2           | 17.6              | 17.0           | 16.4           | 15.8           | 15.5           | 14.1           |
| $r(\text{C}_1\text{-X}_{1\text{-Sub}})$                  | 1.467          | 1.447             | 1.437          | 1.464          | 1.467          | 1.470          | 1.081          |
| $r(\text{C}_3\text{-C}_{1\text{-Sub}})$                  | 1.447          | 1.447             | 1.448          | 1.446          | 1.446          | 1.446          | 1.446          |
| $r(\text{C}_{8a}\text{-N}_{4a})$                         | 1.395          | 1.394             | 1.393          | 1.393          | 1.393          | 1.394          | 1.396          |
| $r(\text{C}_3\text{-N}_{4a})$                            | 1.357          | 1.359             | 1.361          | 1.357          | 1.357          | 1.358          | 1.356          |
| $r(\text{N}_{4a}\text{-B})$                              | 1.550          | 1.550             | 1.550          | 1.552          | 1.552          | 1.550          | 1.552          |
| $r(\text{C}_1\text{-C}_{8a})$                            | 1.431          | 1.434             | 1.430          | 1.430          | 1.430          | 1.431          | 1.418          |
| $r(\text{N}_8\text{-C}_{8a})$                            | 1.316          | 1.315             | 1.316          | 1.316          | 1.316          | 1.316          | 1.318          |
| $r(\text{C}_1\text{-C}_2)$                               | 1.381          | 1.383             | 1.383          | 1.379          | 1.378          | 1.378          | 1.370          |
| $r(\text{C}_2\text{-C}_3)$                               | 1.416          | 1.413             | 1.413          | 1.418          | 1.419          | 1.417          | 1.427          |
| $\varphi(\text{C}_{8a}\text{-N}_{4a}\text{-B})$          | 122.2          | 122.4             | 122.2          | 122.2          | 122.2          | 122.3          | 122.1          |
| $\varphi_e(\text{N}_{4a}\text{-C}_3\text{-C}_2)$         | 109.2          | 109.3             | 109.4          | 109.1          | 109.1          | 109.1          | 109.0          |
| $\varphi(\text{N}_{4a}\text{-B-N}_{4b})$                 | 107.0          | 106.9             | 106.9          | 107.0          | 107.0          | 107.0          | 107.0          |
| $\varphi(\text{C}_1\text{-C}_2\text{-C}_3)$              | 108.6          | 108.5             | 108.1          | 108.4          | 108.4          | 108.5          | 107.8          |
| $\text{WI}(\text{C}_1\text{-C}_{1\text{-Sub}})$          | 1.06           | 1.11              | 1.11           | 1.06           | 1.06           | 1.06           | -              |
| $\text{WI}(\text{C}_3\text{-C}_{1\text{-Sub}})$          | 1.13           | 1.12              | 1.12           | 1.13           | 1.13           | 1.13           | 1.13           |

<sup>a</sup> r - bond lengths in Å,  $\varphi$  – bond angles in degrees,  $\chi$  - dihedral angle in degrees, WI - Wiberg bond indexes; <sup>b</sup> for **A2** – the average value of the deviation from the substituent's location in the plane,  $|\chi_1|=17.0^\circ$ ,  $|\chi_2|=164.7^\circ$ . Natural charges and Wiberg bond indexes are given in Tables S7 and S11.

**Table S2.** Molecular parameters<sup>a</sup> of **B1-7** optimized at CAM-B3LYP/6-31+G(d,p) level.

|                                                                           | <b>B1</b>      | <b>B2</b>         | <b>B3</b>      | <b>B4</b>      | <b>B5</b>      | <b>B6</b>      | <b>B7</b>       |
|---------------------------------------------------------------------------|----------------|-------------------|----------------|----------------|----------------|----------------|-----------------|
| Symmetry                                                                  | C <sub>2</sub> | C <sub>1</sub>    | C <sub>2</sub> | C <sub>2</sub> | C <sub>2</sub> | C <sub>2</sub> | C <sub>2v</sub> |
| $\chi$ (N <sub>4a</sub> -B-N <sub>4b</sub> -N <sub>8</sub> )              | 0.0            | 0.1               | 0.0            | 0.0            | 0.0            | 0.0            | 0.0             |
| $\chi$ (C <sub>2</sub> -C <sub>1</sub> -C <sub>8a</sub> -C <sub>m</sub> ) | 177.0          | 178.6             | 177.9          | 177.5          | 177.6          | 177.2          | 180.0           |
| $\chi$ (C <sub>3</sub> -N <sub>4a</sub> -B-N <sub>4b</sub> )              | 178.9          | 179.8             | 179.7          | 179.1          | 179.2          | 179.1          | 180.0           |
| $\chi_1$  =  $\chi_2$   <sup>b</sup>                                      | 29.3           | 13.4 <sup>b</sup> | 7.6            | 29.5           | 28.4           | 17.3           | -               |
| $\chi_3$  =  $\chi_4$                                                     | 0.0            | 0.2 <sup>c</sup>  | 0.6            | 0.3            | 0.2            | 0.8            | 0.0             |
| r(C <sub>1</sub> -X <sub>1-Sub</sub> )                                    | 1.466          | 1.447             | 1.436          | 1.464          | 1.467          | 1.470          | 1.081           |
| r(C <sub>3</sub> -C <sub>1-Sub</sub> )                                    | 1.494          | 1.494             | 1.494          | 1.494          | 1.494          | 1.494          | 1.494           |
| r(C <sub>8a</sub> -N <sub>4a</sub> )                                      | 1.396          | 1.393             | 1.395          | 1.395          | 1.394          | 1.395          | 1.398           |
| r(C <sub>3</sub> -N <sub>4a</sub> )                                       | 1.346          | 1.350             | 1.350          | 1.346          | 1.345          | 1.346          | 1.344           |
| r(N <sub>4a</sub> -B)                                                     | 1.545          | 1.542             | 1.544          | 1.547          | 1.548          | 1.546          | 1.548           |
| r(C <sub>1</sub> -C <sub>8a</sub> )                                       | 1.432          | 1.431             | 1.431          | 1.431          | 1.431          | 1.433          | 1.419           |
| r(N <sub>8</sub> -C <sub>8a</sub> )                                       | 1.317          | 1.318             | 1.318          | 1.317          | 1.317          | 1.318          | 1.319           |
| r(C <sub>1</sub> -C <sub>2</sub> )                                        | 1.388          | 1.394             | 1.391          | 1.387          | 1.385          | 1.385          | 1.377           |
| r(C <sub>2</sub> -C <sub>3</sub> )                                        | 1.410          | 1.405             | 1.406          | 1.412          | 1.413          | 1.411          | 1.421           |
| $\varphi$ (C <sub>8a</sub> -N <sub>4a</sub> -B)                           | 123.5          | 123.5             | 123.5          | 123.5          | 123.5          | 123.5          | 123.5           |
| $\varphi_e$ (N <sub>4a</sub> -C <sub>3</sub> -C <sub>2</sub> )            | 123.5          | 123.5             | 123.5          | 123.5          | 123.5          | 123.5          | 123.5           |
| $\varphi$ (N <sub>4a</sub> -B-N <sub>4b</sub> )                           | 105.6          | 105.5             | 105.5          | 105.5          | 105.5          | 105.6          | 105.5           |
| $\varphi$ (C <sub>1</sub> -C <sub>2</sub> -C <sub>3</sub> )               | 108.3          | 108.1             | 107.8          | 108.1          | 108.1          | 108.2          | 107.5           |
| WI(C <sub>1</sub> -C <sub>1-Sub</sub> )                                   | 1.07           | 1.11              | 1.11           | 1.06           | 1.06           | 1.06           | -               |
| WI(C <sub>3</sub> -C <sub>1-Sub</sub> )                                   | 1.03           | 1.03              | 1.03           | 1.03           | 1.03           | 1.03           | 1.03            |

<sup>a</sup> r - bond lengths in Å,  $\varphi$  – bond angles in degrees,  $\chi$  - dihedral angle in degrees, WI - Wiberg bond indexes; <sup>b</sup> for **B2** – the average value of the deviation from the substituent's location in the plane, | $\chi_1$ |=14.5 °, | $\chi_2$ |=167.7 °; <sup>c</sup> average value for nonequivalent parameters | $\chi_3$ |, | $\chi_4$ |. Natural charges and Wiberg bond indexes are given in Tables S8 and S12.

**Table S3.** Molecular parameters<sup>a</sup> of **C1-7** optimized at CAM-B3LYP/6-31+G(d,p) level.

|                                                          | <b>C1</b>         | <b>C2</b>         | <b>C3</b>         | <b>C4</b>         | <b>C5</b>         | <b>C6</b>         | <b>C7</b>      |
|----------------------------------------------------------|-------------------|-------------------|-------------------|-------------------|-------------------|-------------------|----------------|
| Symmetry                                                 | C <sub>1</sub>    | C <sub>s</sub> |
| $ \chi(\text{N}_{4a}\text{-B-N}_{4b}\text{-N}_8) $       | 9.5               | 9.5               | 9.5               | 9.5               | 9.4               | 9.5               | 9.3            |
| $ \chi(\text{C}_2\text{-C}_1\text{-C}_{8a}\text{-C}_m) $ | 174.2             | 173.5             | 173.9             | 173.7             | 174.1             | 173.7             | 174.3          |
| $ \chi(\text{C}_3\text{-N}_{4a}\text{-B-N}_{4b}) $       | 169.2             | 168.6             | 168.9             | 168.8             | 169.2             | 168.8             | 169.4          |
| $ \chi_1  =  \chi_2 $ <sup>b</sup>                       | 29.9              | 25.4 <sup>b</sup> | 8.7               | 30.0              | 28.7              | 17.6              | -              |
| $ \chi_3  \approx  \chi_4 $ <sup>c</sup>                 | 36.6 <sup>c</sup> | 37.1 <sup>c</sup> | 37.0 <sup>c</sup> | 36.3 <sup>c</sup> | 36.1 <sup>c</sup> | 36.0 <sup>c</sup> | 35.6           |
| $r(\text{C}_1\text{-X}_{1\text{-Sub}})$                  | 1.466             | 1.446             | 1.437             | 1.464             | 1.466             | 1.469             | 1.081          |
| $r(\text{C}_3\text{-C}_{1\text{-Sub}})$                  | 1.469             | 1.469             | 1.469             | 1.468             | 1.468             | 1.468             | 1.468          |
| $r(\text{C}_{8a}\text{-N}_{4a})$                         | 1.396             | 1.396             | 1.395             | 1.395             | 1.394             | 1.395             | 1.398          |
| $r(\text{C}_3\text{-N}_{4a})$                            | 1.352             | 1.354             | 1.356             | 1.352             | 1.352             | 1.353             | 1.351          |
| $r(\text{N}_{4a}\text{-B})$                              | 1.553             | 1.553             | 1.552             | 1.555             | 1.556             | 1.553             | 1.556          |
| $r(\text{C}_1\text{-C}_{8a})$                            | 1.432             | 1.434             | 1.431             | 1.431             | 1.430             | 1.431             | 1.418          |
| $r(\text{N}_8\text{-C}_{8a})$                            | 1.316             | 1.315             | 1.316             | 1.316             | 1.316             | 1.317             | 1.318          |
| $r(\text{C}_1\text{-C}_2)$                               | 1.383             | 1.386             | 1.385             | 1.382             | 1.380             | 1.380             | 1.372          |
| $r(\text{C}_2\text{-C}_3)$                               | 1.414             | 1.411             | 1.411             | 1.416             | 1.417             | 1.415             | 1.424          |
| $\varphi(\text{C}_{8a}\text{-N}_{4a}\text{-B})$          | 121.7             | 121.8             | 121.6             | 121.7             | 121.7             | 121.7             | 121.7          |
| $\varphi_e(\text{N}_{4a}\text{-C}_3\text{-C}_2)$         | 109.4             | 109.5             | 109.6             | 109.4             | 109.3             | 109.3             | 109.3          |
| $\varphi(\text{N}_{4a}\text{-B-N}_{4b})$                 | 106.6             | 106.5             | 106.5             | 106.5             | 106.5             | 106.6             | 106.6          |
| $\varphi(\text{C}_1\text{-C}_2\text{-C}_3)$              | 108.5             | 108.4             | 108.1             | 108.4             | 108.4             | 108.4             | 107.8          |
| $\text{WI}(\text{C}_1\text{-C}_{1\text{-Sub}})$          | 1.06              | 1.11              | 1.11              | 1.06              | 1.06              | 1.06              | -              |
| $\text{WI}(\text{C}_3\text{-C}_{1\text{-Sub}})$          | 1.06              | 1.06              | 1.06              | 1.07              | 1.07              | 1.07              | 1.07           |

<sup>a</sup>  $r$  - bond lengths in Å,  $\varphi$  - bond angles in degrees,  $\chi$  - dihedral angle in degrees, WI - Wiberg bond indexes; <sup>b</sup> for **C2** – the average value of the deviation from the substituent's location in the plane,  $|\chi_1| = 18.9^\circ$ ,  $|\chi_2| = 149.2^\circ$ ; <sup>c</sup> average values for nonequivalent parameters  $|\chi_3|$ ,  $|\chi_4|$ , for **C7** –  $|\chi_3| \approx |\chi_4|$ . Natural charges and Wiberg bond indexes are given in Tables S9 and S13.

**Table S4.** Molecular parameters<sup>a</sup> of **D1-7** optimized at CAM-B3LYP/6-31+G(d,p) level.

|                                                          | D1             | D2                | D3             | D4             | D5             | D6             | D7              |
|----------------------------------------------------------|----------------|-------------------|----------------|----------------|----------------|----------------|-----------------|
| Symmetry                                                 | C <sub>2</sub> | C <sub>1</sub>    | C <sub>2</sub> | C <sub>2</sub> | C <sub>2</sub> | C <sub>2</sub> | C <sub>2v</sub> |
| $ \chi(\text{N}_{4a}\text{-B-N}_{4b}\text{-N}_8) $       | 0.0            | 0.4               | 0.0            | 0.0            | 0.0            | 0.0            | 0.0             |
| $ \chi(\text{C}_2\text{-C}_1\text{-C}_{8a}\text{-C}_m) $ | 176.8          | 178.2             | 178.0          | 177.3          | 177.4          | 177.0          | 180.0           |
| $ \chi(\text{C}_3\text{-N}_{4a}\text{-B-N}_{4b}) $       | 178.7          | 179.4             | 179.6          | 178.9          | 178.9          | 178.9          | 180.0           |
| $ \chi_1  =  \chi_2 $ <sup>b</sup>                       | 28.8           | 12.5 <sup>b</sup> | 6.7            | 29.3           | 28.7           | 17.2           | -               |
| $r(\text{C}_1\text{-X}_{1\text{-Sub}})$                  | 1.465          | 1.444             | 1.435          | 1.463          | 1.466          | 1.469          | 1.081           |
| $r(\text{C}_3\text{-H}_{1\text{-Sub}})$                  | 1.082          | 1.082             | 1.082          | 1.082          | 1.082          | 1.082          | 1.082           |
| $r(\text{C}_{8a}\text{-N}_{4a})$                         | 1.396          | 1.395             | 1.394          | 1.395          | 1.395          | 1.395          | 1.398           |
| $r(\text{C}_3\text{-N}_{4a})$                            | 1.337          | 1.338             | 1.340          | 1.336          | 1.335          | 1.336          | 1.334           |
| $r(\text{N}_{4a}\text{-B})$                              | 1.546          | 1.546             | 1.545          | 1.548          | 1.550          | 1.547          | 1.550           |
| $r(\text{C}_1\text{-C}_{8a})$                            | 1.435          | 1.438             | 1.434          | 1.434          | 1.434          | 1.435          | 1.421           |
| $r(\text{N}_8\text{-C}_{8a})$                            | 1.318          | 1.317             | 1.318          | 1.317          | 1.317          | 1.318          | 1.319           |
| $r(\text{C}_1\text{-C}_2)$                               | 1.391          | 1.395             | 1.394          | 1.389          | 1.387          | 1.387          | 1.379           |
| $r(\text{C}_2\text{-C}_3)$                               | 1.403          | 1.399             | 1.399          | 1.405          | 1.406          | 1.404          | 1.414           |
| $\varphi(\text{C}_{8a}\text{-N}_{4a}\text{-B})$          | 124.2          | 124.3             | 124.2          | 124.2          | 124.2          | 124.2          | 124.1           |
| $\varphi_e(\text{N}_{4a}\text{-C}_3\text{-C}_2)$         | 110.7          | 110.9             | 110.9          | 110.7          | 110.7          | 110.7          | 110.6           |
| $\varphi(\text{N}_{4a}\text{-B-N}_{4b})$                 | 104.7          | 104.7             | 104.6          | 104.6          | 104.6          | 104.7          | 104.6           |
| $\varphi(\text{C}_1\text{-C}_2\text{-C}_3)$              | 107.6          | 107.5             | 107.1          | 107.4          | 107.4          | 107.4          | 106.8           |
| $\text{WI}(\text{C}_1\text{-C}_{1\text{-Sub}})$          | 1.07           | 1.12              | 1.12           | 1.07           | 1.06           | 1.06           | -               |
| $\text{WI}(\text{C}_3\text{-H}_{1\text{-Sub}})$          | 0.90           | 0.90              | 0.90           | 0.90           | 0.90           | 0.90           | 0.90            |

<sup>a</sup>  $r$  - bond lengths in Å,  $\varphi$  – bond angles in degrees,  $\chi$  - dihedral angle in degrees, WI - Wiberg bond indexes; <sup>b</sup> for **D2** – the average value of the deviation from the substituent's location in the plane,  $|\chi_1| = 13.1^\circ$ ,  $|\chi_2| = 168.2^\circ$ . Natural charges and Wiberg bond indexes are given in Tables S10 and S14.

**Table S5.** Rotation angles  $\chi_1$  ( $^\circ$ ) for aza-BODIPY derivatives according to PBE/6-31G(d) calculations.

| Substituent                         | phenyl | 2-thiophenyl | 2-furanyl | 3-pyridinyl | 4-pyridinyl | 2-pyridinyl |
|-------------------------------------|--------|--------------|-----------|-------------|-------------|-------------|
| once substituted at position 1      | 17.5   | 0.0          | 0.0       | 19.5        | 16.7        | 0.0         |
| doble substituted at positions 1, 7 | 22.0   | 13.8         | 7.8       | 24.3        | 22.3        | 11.5        |

**Table S6.** Relative energies (kJ mol<sup>-1</sup>) of conformers II<sup>a</sup> in relation to conformer I for **A1-6**.

|                        | A1   | A2   | A3    | A4   | A5   | A6   |
|------------------------|------|------|-------|------|------|------|
| CAM-B3LYP <sup>b</sup> | 8.52 | 5.93 | 5.25  | 9.06 | 5.69 | 7.80 |
| PBE <sup>b</sup>       | 9.49 | 0.92 | -0.79 | 7.06 | 7.38 | 0.74 |

<sup>a</sup> See Figure 3; <sup>b</sup> see Computational details.



**Table S7.** Natural charges at atoms calculated<sup>a</sup> in the framework of natural population analysis for **A1-7**.

|                 | <b>A1</b>      | <b>A2</b>      | <b>A3</b>      | <b>A4</b>      | <b>A5</b>      | <b>A6</b>      | <b>A7</b>      |
|-----------------|----------------|----------------|----------------|----------------|----------------|----------------|----------------|
| Symmetry        | C <sub>2</sub> | C <sub>1</sub> | C <sub>2</sub> |
| N <sub>4a</sub> | -0.63          | -0.62          | -0.62          | -0.63          | -0.63          | -0.63          | -0.62          |
| C <sub>8a</sub> | 0.34           | 0.36           | 0.35           | 0.34           | 0.34           | 0.35           | 0.31           |
| C <sub>1</sub>  | -0.02          | -0.04          | -0.05          | -0.02          | -0.04          | -0.04          | -0.20          |
| C <sub>2</sub>  | -0.26          | -0.29          | -0.29          | -0.28          | -0.24          | -0.26          | -0.31          |
| C <sub>3</sub>  | 0.26           | 0.26           | 0.26           | 0.26           | 0.26           | 0.26           | 0.26           |
| N <sub>4b</sub> | -0.63          | -0.62          | -0.62          | -0.63          | -0.62          | -0.63          | -0.62          |
| C <sub>8b</sub> | 0.34           | 0.34           | 0.35           | 0.34           | 0.35           | 0.35           | 0.31           |
| C <sub>7</sub>  | -0.01          | -0.03          | -0.05          | -0.03          | -0.03          | -0.05          | -0.20          |
| C <sub>6</sub>  | -0.29          | -0.30          | -0.29          | -0.25          | -0.27          | -0.23          | -0.31          |
| C <sub>5</sub>  | 0.26           | 0.26           | 0.26           | 0.26           | 0.27           | 0.25           | 0.26           |
| B               | 1.35           | 1.31           | 1.31           | 1.35           | 1.35           | 1.35           | 1.31           |
| N <sub>m</sub>  | -0.39          | -0.40          | -0.40          | -0.40          | -0.39          | -0.40          | -0.38          |
| F               | -0.56          | -0.57          | -0.57          | -0.56          | -0.56          | -0.56          | -0.56          |
| F               | -0.56          | -0.57          | -0.57          | -0.56          | -0.56          | -0.56          | -0.56          |

<sup>a</sup> CAM-B3LYP/6-31+G(d,p)

**Table S8.** Natural charges at atoms calculated<sup>a</sup> in the framework of natural population analysis for **B1-7**.

|                 | <b>B1</b>      | <b>B2</b>      | <b>B3</b>      | <b>B4</b>      | <b>B5</b>      | <b>B6</b>      | <b>B7</b>       |
|-----------------|----------------|----------------|----------------|----------------|----------------|----------------|-----------------|
| Symmetry        | C <sub>2</sub> | C <sub>1</sub> | C <sub>2</sub> | C <sub>2</sub> | C <sub>2</sub> | C <sub>2</sub> | C <sub>2v</sub> |
| N <sub>4a</sub> | -0.64          | -0.64          | -0.63          | -0.63          | -0.63          | -0.63          | -0.63           |
| C <sub>8a</sub> | 0.32           | 0.33           | 0.34           | 0.33           | 0.33           | 0.33           | 0.30            |
| C <sub>1</sub>  | 0.00           | -0.03          | -0.05          | -0.01          | -0.02          | -0.03          | -0.20           |
| C <sub>2</sub>  | -0.31          | -0.31          | -0.31          | -0.31          | -0.30          | -0.29          | -0.33           |
| C <sub>3</sub>  | 0.33           | 0.32           | 0.32           | 0.33           | 0.33           | 0.33           | 0.33            |
| N <sub>4b</sub> | -0.64          | -0.64          | -0.63          | -0.63          | -0.63          | -0.63          | -0.63           |
| C <sub>8b</sub> | 0.32           | 0.33           | 0.34           | 0.32           | 0.33           | 0.33           | 0.30            |
| C <sub>7</sub>  | 0.00           | -0.03          | -0.05          | 0.00           | -0.01          | -0.02          | -0.20           |
| C <sub>6</sub>  | -0.32          | -0.30          | -0.31          | -0.31          | -0.30          | -0.29          | -0.33           |
| C <sub>5</sub>  | 0.33           | 0.32           | 0.32           | 0.33           | 0.33           | 0.33           | 0.33            |
| B               | 1.35           | 1.35           | 1.31           | 1.35           | 1.35           | 1.36           | 1.31            |
| N <sub>m</sub>  | -0.38          | -0.38          | -0.38          | -0.38          | -0.37          | -0.38          | -0.35           |
| F               | -0.56          | -0.56          | -0.57          | -0.56          | -0.56          | -0.56          | -0.57           |
| F               | -0.56          | -0.56          | -0.57          | -0.56          | -0.56          | -0.56          | -0.57           |

<sup>a</sup> CAM-B3LYP/6-31+G(d,p)**Table S9.** Natural charges at atoms calculated<sup>a</sup> in the framework of natural population analysis for **C1-7**.

|                 | <b>C1</b>      | <b>C2</b>      | <b>C3</b>      | <b>C4</b>      | <b>C5</b>      | <b>C6</b>      | <b>C7</b>      |
|-----------------|----------------|----------------|----------------|----------------|----------------|----------------|----------------|
| Symmetry        | C <sub>1</sub> | C <sub>s</sub> |
| N <sub>4a</sub> | -0.62          | -0.61          | -0.62          | -0.62          | -0.61          | -0.62          | -0.61          |
| C <sub>8a</sub> | 0.33           | 0.34           | 0.35           | 0.34           | 0.34           | 0.34           | 0.31           |
| C <sub>1</sub>  | 0.00           | -0.05          | -0.06          | -0.04          | -0.02          | -0.04          | -0.20          |
| C <sub>2</sub>  | -0.30          | -0.30          | -0.30          | -0.28          | -0.28          | -0.28          | -0.31          |
| C <sub>3</sub>  | 0.29           | 0.30           | 0.29           | 0.29           | 0.30           | 0.29           | 0.30           |
| N <sub>4b</sub> | -0.62          | -0.62          | -0.62          | -0.62          | -0.61          | -0.62          | -0.61          |
| C <sub>8b</sub> | 0.33           | 0.33           | 0.35           | 0.34           | 0.34           | 0.34           | 0.31           |
| C <sub>7</sub>  | 0.00           | -0.05          | -0.05          | -0.03          | -0.02          | -0.03          | -0.20          |
| C <sub>6</sub>  | -0.30          | -0.30          | -0.30          | -0.28          | -0.29          | -0.28          | -0.31          |
| C <sub>5</sub>  | 0.30           | 0.29           | 0.29           | 0.30           | 0.30           | 0.30           | 0.30           |
| B               | 1.35           | 1.32           | 1.32           | 1.35           | 1.35           | 1.35           | 1.31           |
| N <sub>m</sub>  | -0.37          | -0.38          | -0.38          | -0.39          | -0.38          | -0.39          | -0.36          |
| F               | -0.55          | -0.57          | -0.57          | -0.55          | -0.55          | -0.55          | -0.56          |
| F               | -0.56          | -0.56          | -0.56          | -0.54          | -0.55          | -0.54          | -0.56          |

<sup>a</sup> CAM-B3LYP/6-31+G(d,p)

**Table S10.** Natural charges at atoms calculated<sup>a</sup> in the framework of natural population analysis for **D1-7**.

|                 | <b>D1</b>      | <b>D2</b>      | <b>D3</b>      | <b>D4</b>      | <b>D5</b>      | <b>D6</b>      | <b>D7</b>       |
|-----------------|----------------|----------------|----------------|----------------|----------------|----------------|-----------------|
| Symmetry        | C <sub>2</sub> | C <sub>1</sub> | C <sub>2</sub> | C <sub>2</sub> | C <sub>2</sub> | C <sub>2</sub> | C <sub>2v</sub> |
| N <sub>4a</sub> | -0.63          | -0.62          | -0.62          | -0.62          | -0.62          | -0.62          | -0.61           |
| C <sub>8a</sub> | 0.32           | 0.33           | 0.34           | 0.32           | 0.33           | 0.33           | 0.29            |
| C <sub>1</sub>  | 0.00           | -0.02          | -0.05          | -0.01          | -0.01          | -0.05          | -0.20           |
| C <sub>2</sub>  | -0.32          | -0.32          | -0.31          | -0.31          | -0.30          | -0.23          | -0.34           |
| C <sub>3</sub>  | 0.10           | 0.10           | 0.09           | 0.10           | 0.10           | 0.08           | 0.11            |
| N <sub>4b</sub> | -0.62          | -0.63          | -0.62          | -0.62          | -0.62          | -0.62          | -0.61           |
| C <sub>8b</sub> | 0.32           | 0.32           | 0.34           | 0.33           | 0.33           | 0.33           | 0.29            |
| C <sub>7</sub>  | 0.00           | -0.02          | -0.05          | -0.01          | -0.02          | -0.05          | -0.20           |
| C <sub>6</sub>  | -0.32          | -0.33          | -0.31          | -0.31          | -0.30          | -0.24          | -0.34           |
| C <sub>5</sub>  | 0.10           | 0.10           | 0.09           | 0.10           | 0.10           | 0.08           | 0.11            |
| B               | 1.35           | 1.31           | 1.31           | 1.35           | 1.35           | 1.35           | 1.31            |
| N <sub>m</sub>  | -0.35          | -0.34          | -0.37          | -0.36          | -0.35          | -0.36          | -0.33           |
| F               | -0.56          | -0.57          | -0.57          | -0.56          | -0.56          | -0.56          | -0.56           |
| F               | -0.56          | -0.57          | -0.57          | -0.56          | -0.56          | -0.56          | -0.56           |

<sup>a</sup> CAM-B3LYP/6-31+G(d,p)**Table S11.** Wiberg bond indexes calculated<sup>a</sup> for **A1-7**.

|                                  | <b>A1</b>      | <b>A2</b>      | <b>A3</b>      | <b>A4</b>      | <b>A5</b>      | <b>A6</b>      | <b>A7</b>      |
|----------------------------------|----------------|----------------|----------------|----------------|----------------|----------------|----------------|
| Symmetry                         | C <sub>2</sub> | C <sub>1</sub> | C <sub>2</sub> |
| C <sub>8a</sub> -N <sub>4a</sub> | 1.08           | 1.08           | 1.08           | 1.08           | 1.08           | 1.08           | 1.07           |
| C <sub>3</sub> -N <sub>4a</sub>  | 1.25           | 1.24           | 1.24           | 1.25           | 1.26           | 1.25           | 1.27           |
| N <sub>4a</sub> -B               | 0.62           | 0.63           | 0.63           | 0.62           | 0.62           | 0.62           | 0.63           |
| C <sub>1</sub> -C <sub>8a</sub>  | 1.18           | 1.16           | 1.17           | 1.18           | 1.18           | 1.18           | 1.22           |
| N <sub>m</sub> -C <sub>4a</sub>  | 1.39           | 1.40           | 1.39           | 1.39           | 1.39           | 1.39           | 1.39           |
| C <sub>1</sub> -C <sub>2</sub>   | 1.47           | 1.44           | 1.43           | 1.48           | 1.48           | 1.48           | 1.55           |
| C <sub>2</sub> -C <sub>3</sub>   | 1.29           | 1.30           | 1.31           | 1.29           | 1.28           | 1.29           | 1.27           |
| B-F                              | 0.65           | 0.67           | 0.68           | 0.65           | 0.65           | 0.65           | 0.68           |

<sup>a</sup> CAM-B3LYP/6-31+G(d,p)**Table S12.** Wiberg bond indexes calculated<sup>a</sup> for **B1-7**.

|                                  | <b>B1</b>      | <b>B2</b>      | <b>B3</b>      | <b>B4</b>      | <b>B5</b>      | <b>B6</b>      | <b>B7</b>       |
|----------------------------------|----------------|----------------|----------------|----------------|----------------|----------------|-----------------|
| Symmetry                         | C <sub>2</sub> | C <sub>1</sub> | C <sub>2</sub> | C <sub>2</sub> | C <sub>2</sub> | C <sub>2</sub> | C <sub>2v</sub> |
| C <sub>8a</sub> -N <sub>4a</sub> | 1.06           | 1.07           | 1.07           | 1.07           | 1.07           | 1.07           | 1.05            |
| C <sub>3</sub> -N <sub>4a</sub>  | 1.29           | 1.27           | 1.28           | 1.30           | 1.30           | 1.29           | 1.32            |
| N <sub>4a</sub> -B               | 0.62           | 0.62           | 0.63           | 0.62           | 0.62           | 0.61           | 0.63            |
| C <sub>1</sub> -C <sub>8a</sub>  | 1.18           | 1.18           | 1.17           | 1.18           | 1.18           | 1.18           | 1.22            |
| N <sub>m</sub> -C <sub>4a</sub>  | 1.40           | 1.39           | 1.40           | 1.40           | 1.40           | 1.40           | 1.40            |
| C <sub>1</sub> -C <sub>2</sub>   | 1.45           | 1.40           | 1.41           | 1.45           | 1.46           | 1.46           | 1.53            |
| C <sub>2</sub> -C <sub>3</sub>   | 1.33           | 1.36           | 1.35           | 1.32           | 1.31           | 1.32           | 1.30            |
| B-F                              | 0.66           | 0.65           | 0.68           | 0.66           | 0.66           | 0.65           | 0.68            |

<sup>a</sup> CAM-B3LYP/6-31+G(d,p)

**Table S13.** Wiberg bond indexes calculated<sup>a</sup> for **C1-7**.

|                                  | <b>C1</b>      | <b>C2</b>      | <b>C3</b>      | <b>C4</b>      | <b>C5</b>      | <b>C6</b>      | <b>C7</b>      |
|----------------------------------|----------------|----------------|----------------|----------------|----------------|----------------|----------------|
| Symmetry                         | C <sub>1</sub> | C <sub>s</sub> |
| C <sub>8a</sub> -N <sub>4a</sub> | 1.07           | 1.07           | 1.08           | 1.08           | 1.08           | 1.08           | 1.06           |
| C <sub>3</sub> -N <sub>4a</sub>  | 1.28           | 1.27           | 1.27           | 1.28           | 1.29           | 1.28           | 1.30           |
| N <sub>4a</sub> -B               | 0.62           | 0.62           | 0.62           | 0.62           | 0.61           | 0.62           | 0.63           |
| C <sub>1</sub> -C <sub>8a</sub>  | 1.18           | 1.16           | 1.17           | 1.18           | 1.18           | 1.18           | 1.22           |
| N <sub>m</sub> -C <sub>4a</sub>  | 1.40           | 1.40           | 1.40           | 1.39           | 1.40           | 1.39           | 1.40           |
| C <sub>1</sub> -C <sub>2</sub>   | 1.46           | 1.44           | 1.43           | 1.47           | 1.48           | 1.47           | 1.55           |
| C <sub>2</sub> -C <sub>3</sub>   | 1.31           | 1.32           | 1.33           | 1.30           | 1.30           | 1.30           | 1.28           |
| B-F                              | 0.66           | 0.65           | 0.65           | 0.64           | 0.64           | 0.64           | 0.66           |

<sup>a</sup> CAM-B3LYP/6-31+G(d,p)**Table S14.** Wiberg bond indexes calculated<sup>a</sup> for **D1-7**.

|                                  | <b>D1</b>      | <b>D2</b>      | <b>D3</b>      | <b>D4</b>      | <b>D5</b>      | <b>D6</b>      | <b>D7</b>       |
|----------------------------------|----------------|----------------|----------------|----------------|----------------|----------------|-----------------|
| Symmetry                         | C <sub>2</sub> | C <sub>1</sub> | C <sub>2</sub> | C <sub>2</sub> | C <sub>2</sub> | C <sub>2</sub> | C <sub>2v</sub> |
| C <sub>8a</sub> -N <sub>4a</sub> | 1.07           | 1.07           | 1.08           | 1.07           | 1.07           | 1.07           | 1.06            |
| C <sub>3</sub> -N <sub>4a</sub>  | 1.32           | 1.31           | 1.30           | 1.33           | 1.34           | 1.33           | 1.35            |
| N <sub>4a</sub> -B               | 0.61           | 0.63           | 0.63           | 0.61           | 0.61           | 0.61           | 0.62            |
| C <sub>1</sub> -C <sub>8a</sub>  | 1.18           | 1.17           | 1.17           | 1.18           | 1.18           | 1.18           | 1.22            |
| N <sub>m</sub> -C <sub>4a</sub>  | 1.40           | 1.41           | 1.40           | 1.40           | 1.40           | 1.40           | 1.40            |
| C <sub>1</sub> -C <sub>2</sub>   | 1.44           | 1.42           | 1.40           | 1.45           | 1.46           | 1.45           | 1.54            |
| C <sub>2</sub> -C <sub>3</sub>   | 1.36           | 1.38           | 1.39           | 1.35           | 1.35           | 1.35           | 1.33            |
| B-F                              | 0.67           | 0.69           | 0.69           | 0.67           | 0.67           | 0.67           | 0.69            |

<sup>a</sup> CAM-B3LYP/6-31+G(d,p)

**Table S15.** Contributions of aza-BODIPY core and substituent groups R<sub>1</sub>-R<sub>4</sub> to frontier MOs of **A1-7**, **B1-B7**, **C1-C7**, **D1-7**.

| Molecule  | HOMO contributors, % |                |                |                |                | LUMO contributors, % |                |                |                |                |
|-----------|----------------------|----------------|----------------|----------------|----------------|----------------------|----------------|----------------|----------------|----------------|
|           | Core                 | R <sub>1</sub> | R <sub>2</sub> | R <sub>3</sub> | R <sub>4</sub> | Core                 | R <sub>1</sub> | R <sub>2</sub> | R <sub>3</sub> | R <sub>4</sub> |
| <b>A1</b> | 61.5                 | 3.2            | 3.2            | 16.1           | 16.1           | 72.8                 | 4.1            | 4.1            | 9.5            | 9.5            |
| <b>A2</b> | 57.9                 | 6.8            | 7.1            | 13.9           | 14.2           | 68.8                 | 6.9            | 7.0            | 8.9            | 8.4            |
| <b>A3</b> | 56.8                 | 8.2            | 8.2            | 13.4           | 13.4           | 69.1                 | 6.7            | 6.7            | 8.8            | 8.8            |
| <b>A4</b> | 61.4                 | 2.3            | 2.3            | 17.0           | 17.0           | 72.7                 | 4.1            | 4.1            | 9.6            | 9.6            |
| <b>A5</b> | 61.3                 | 1.6            | 1.6            | 17.7           | 17.7           | 72.5                 | 4.2            | 4.2            | 9.5            | 9.5            |
| <b>A6</b> | 61.3                 | 2.3            | 2.3            | 17.1           | 17.1           | 71.9                 | 4.8            | 4.8            | 9.3            | 9.3            |
| <b>A7</b> | 64.5                 | 0.0            | 0.0            | 17.7           | 17.7           | 78.1                 | 0.1            | 0.1            | 10.9           | 10.9           |
| <b>B1</b> | 81.5                 | 7.2            | 7.2            | 2.1            | 2.1            | 85.8                 | 5.6            | 5.6            | 1.5            | 1.5            |
| <b>B2</b> | 66.8                 | 15.4           | 15.4           | 1.6            | 1.6            | 79.0                 | 9.2            | 9.2            | 1.3            | 1.3            |
| <b>B3</b> | 63.5                 | 16.8           | 16.8           | 1.5            | 1.5            | 80.3                 | 8.5            | 8.5            | 1.4            | 1.4            |
| <b>B4</b> | 84.9                 | 5.3            | 5.3            | 2.3            | 2.3            | 85.8                 | 5.6            | 5.6            | 1.5            | 1.5            |
| <b>B5</b> | 84.9                 | 5.3            | 5.3            | 2.3            | 2.3            | 85.8                 | 5.6            | 5.6            | 1.5            | 1.5            |
| <b>B6</b> | 84.9                 | 5.3            | 5.3            | 2.3            | 2.3            | 84.1                 | 6.5            | 6.5            | 1.4            | 1.4            |
| <b>B7</b> | 95.1                 | 0.0            | 0.0            | 2.4            | 2.4            | 96.3                 | 0.1            | 0.1            | 1.8            | 1.8            |
| <b>C1</b> | 70.9                 | 4.4            | 4.8            | 9.8            | 10.1           | 78.4                 | 4.7            | 4.9            | 6.0            | 6.0            |
| <b>C2</b> | 63.0                 | 11.5           | 10.2           | 7.5            | 7.9            | 73.5                 | 8.1            | 7.5            | 5.3            | 5.6            |
| <b>C3</b> | 60.7                 | 12.9           | 12.0           | 7.0            | 7.3            | 74.7                 | 7.2            | 7.4            | 5.3            | 5.4            |
| <b>C4</b> | 71.5                 | 3.1            | 3.4            | 10.7           | 11.2           | 75.7                 | 4.7            | 4.9            | 5.8            | 6.0            |
| <b>C5</b> | 72.4                 | 2.0            | 2.2            | 11.5           | 11.9           | 78.3                 | 4.9            | 5.1            | 5.9            | 5.8            |
| <b>C6</b> | 71.8                 | 3.3            | 3.1            | 10.6           | 11.1           | 77.6                 | 5.6            | 5.4            | 5.6            | 5.8            |
| <b>C7</b> | 76.9                 | 0.0            | 0.0            | 11.5           | 11.5           | 84.2                 | 0.1            | 0.1            | 7.4            | 7.4            |
| <b>D1</b> | 77.4                 | 11.2           | 11.2           | 0.0            | 0.0            | 88.6                 | 5.6            | 5.6            | 0.1            | 0.1            |
| <b>D2</b> | 59.6                 | 20.2           | 20.2           | 0.0            | 0.0            | 82.5                 | 8.7            | 8.7            | 0.1            | 0.1            |
| <b>D3</b> | 55.5                 | 22.2           | 22.2           | 0.0            | 0.0            | 82.8                 | 8.5            | 8.5            | 0.1            | 0.1            |
| <b>D4</b> | 84.0                 | 7.9            | 7.9            | 0.1            | 0.1            | 88.6                 | 5.5            | 5.5            | 0.1            | 0.1            |
| <b>D5</b> | 90.9                 | 4.5            | 4.5            | 0.1            | 0.1            | 88.8                 | 5.6            | 5.6            | 0.1            | 0.1            |
| <b>D6</b> | 84.1                 | 7.9            | 7.9            | 0.1            | 0.1            | 87.6                 | 6.1            | 6.1            | 0.1            | 0.1            |
| <b>D7</b> | 99.8                 | 0.0            | 0.0            | 0.1            | 0.1            | 99.7                 | 0.1            | 0.1            | 0.1            | 0.1            |

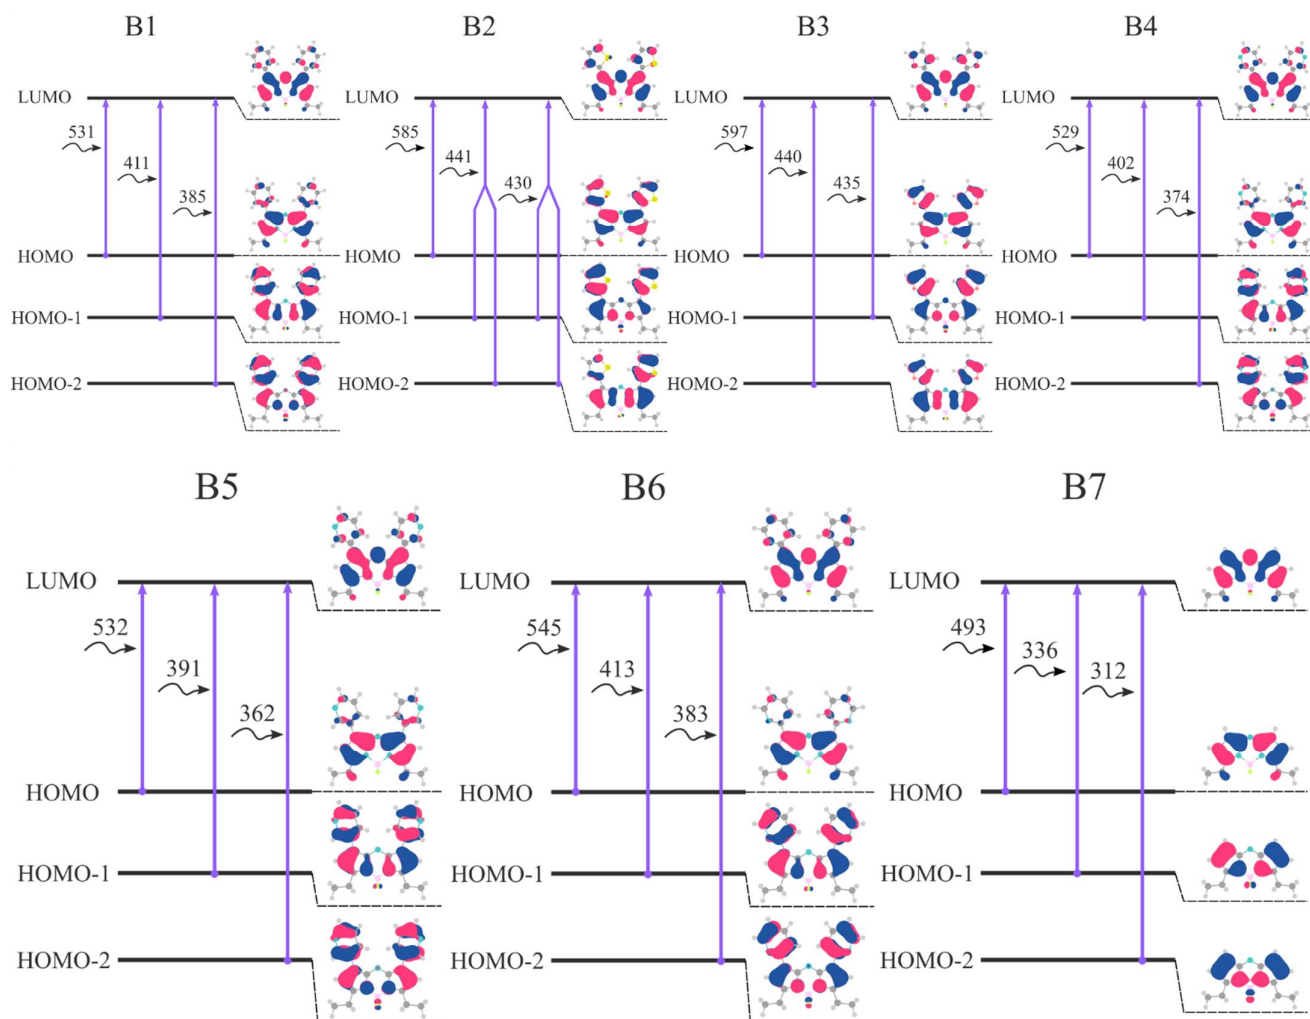

**Figure S5.** Visual representation of the first three transitions for molecules **B1-7** calculated at CAM-B3LYP/6-31+G(d,p) level. Isosurface cutoff is 0.03.

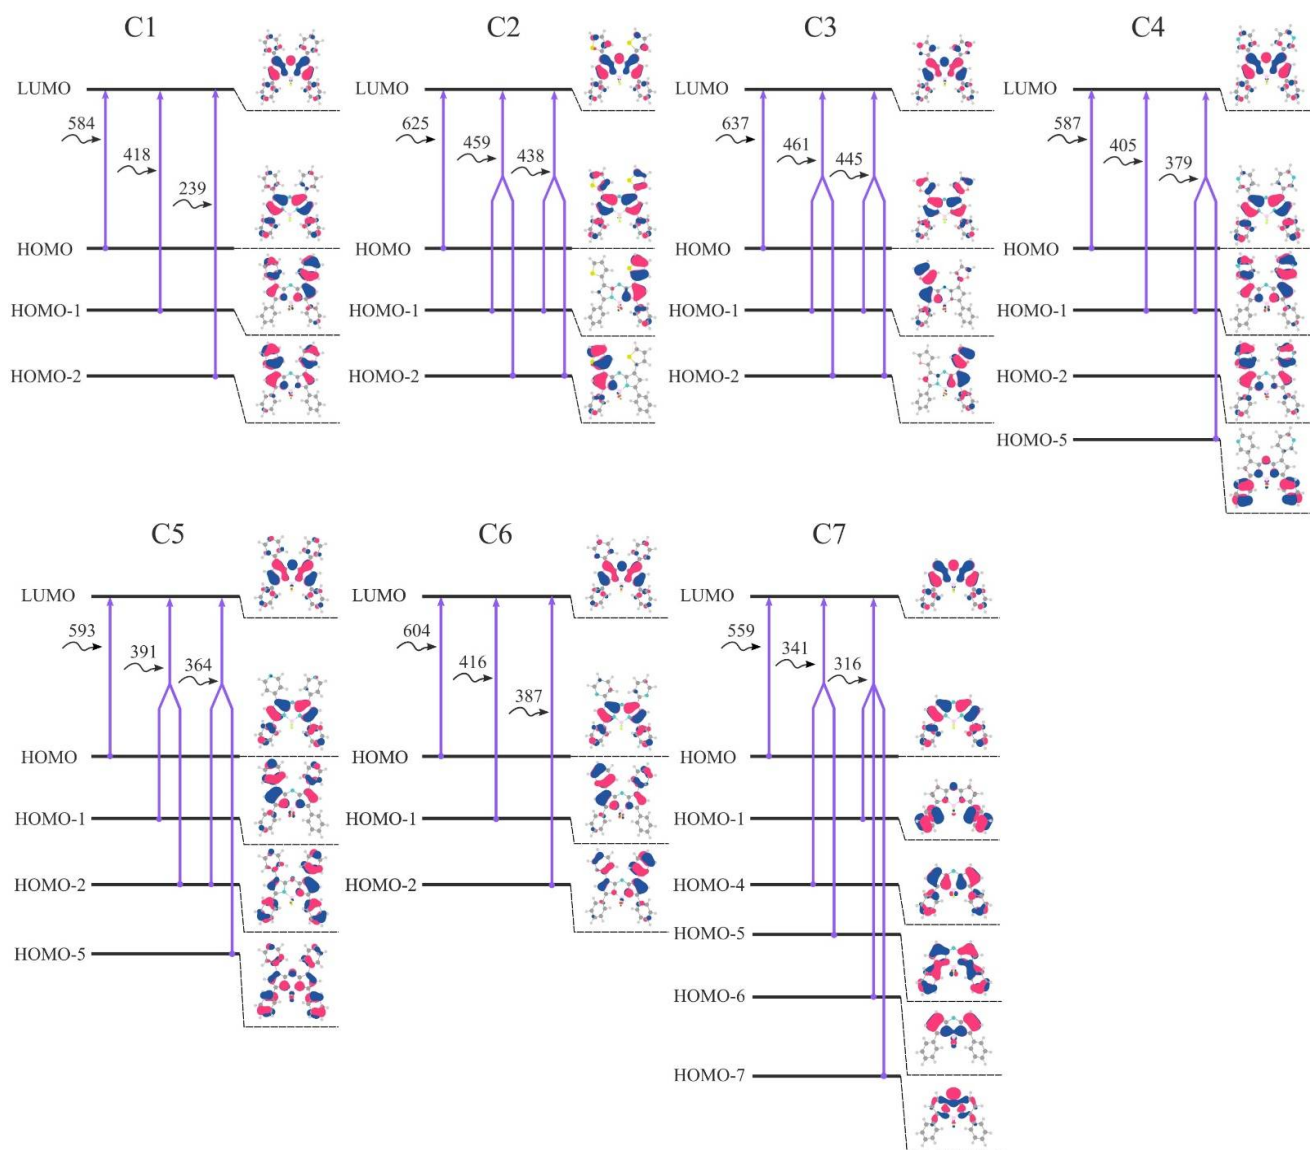

**Figure S6.** Visual representation of the first three transitions for molecules **C1-7** calculated at CAM-B3LYP/6-31+G(d,p) level. Isosurface cutoff is 0.03.

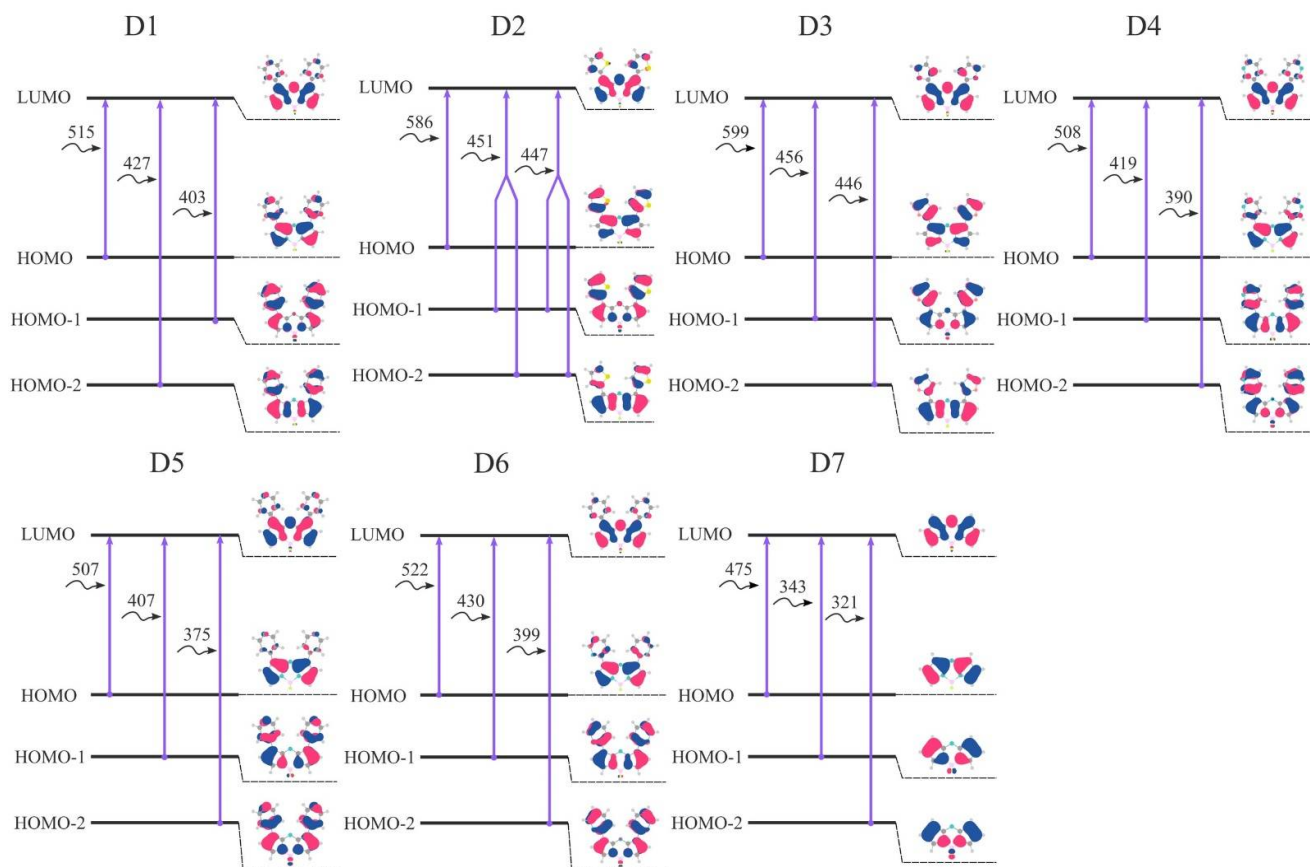

**Figure S7.** Visual representation of the first three transitions for molecules **D1-7** calculated at CAM-B3LYP/6-31+G(d,p) level. Isosurface cutoff is 0.03.



**Table S16.** Calculated (CAM-B3LYP/6-31+G(d,p)) composition of five lowest excited states and corresponding oscillator strengths.

| Compound | Transition and state symmetry | Main determinant contributions (CI expansion coefficient squared), %                          | Energy, eV | Energy, cm <sup>-1</sup> | Wavelength, nm | Oscillator Strength |
|----------|-------------------------------|-----------------------------------------------------------------------------------------------|------------|--------------------------|----------------|---------------------|
| A1       | 1 (B)                         | HOMO -> LUMO, 98.4                                                                            | 1.92       | 15486                    | 647            | 0.918               |
|          | 2 (B)                         | HOMO-1 -> LUMO, 91.4                                                                          | 3.00       | 24197                    | 413            | 0.013               |
|          | 3 (A)                         | HOMO-2 -> LUMO, 87.5<br>HOMO-3 -> LUMO, 7.2                                                   | 3.17       | 25568                    | 391            | 0.536               |
|          | 4 (A)                         | HOMO-2 -> LUMO, 8.3<br>HOMO-3 -> LUMO, 85.9                                                   | 3.71       | 29923                    | 334            | 0.388               |
|          | 5 (B)                         | HOMO-5 -> LUMO, 43.5<br>HOMO-11 -> LUMO, 50.7                                                 | 3.84       | 30972                    | 323            | 0.150               |
| A2       | 1 (A)                         | HOMO -> LUMO, 98.4                                                                            | 1.83       | 14760                    | 679            | 0.886               |
|          | 2 (A)                         | HOMO-1 -> LUMO, 83.9<br>HOMO-2 -> LUMO, 10.0                                                  | 2.69       | 21697                    | 460            | 0.005               |
|          | 3 (A)                         | HOMO-1 -> LUMO, 10.1<br>HOMO-2 -> LUMO, 83.7                                                  | 2.83       | 22826                    | 438            | 0.570               |
|          | 4 (A)                         | HOMO-3 -> LUMO, 90.7                                                                          | 3.67       | 29601                    | 338            | 0.376               |
|          | 5 (A)                         | HOMO-4 -> LUMO, 48.8<br>HOMO-5 -> LUMO, 35.5<br>HOMO-11 -> LUMO, 11.5                         | 3.81       | 30730                    | 326            | 0.051               |
| A3       | 1 (B)                         | HOMO -> LUMO, 98.6                                                                            | 1.79       | 14437                    | 693            | 0.879               |
|          | 2 (B)                         | HOMO-1 -> LUMO, 94.3                                                                          | 2.66       | 21455                    | 466            | 0.006               |
|          | 3 (A)                         | HOMO-2 -> LUMO, 94.6                                                                          | 2.78       | 22422                    | 446            | 0.582               |
|          | 4 (A)                         | HOMO-3 -> LUMO, 91.6                                                                          | 3.67       | 29601                    | 338            | 0.373               |
|          | 5 (B)                         | HOMO-4 -> LUMO, 28.1<br>HOMO-6 -> LUMO, 46.1<br>HOMO-11 -> LUMO, 14.7                         | 4.01       | 32343                    | 309            | 0.002               |
| A4       | 1 (B)                         | HOMO -> LUMO, 98.4                                                                            | 1.89       | 15244                    | 657            | 0.913               |
|          | 2 (B)                         | HOMO-2 -> LUMO, 90.1                                                                          | 3.10       | 25003                    | 400            | 0.024               |
|          | 3 (A)                         | HOMO-1 -> LUMO, 74.8<br>HOMO-3 -> LUMO, 18.9                                                  | 3.28       | 26455                    | 378            | 0.551               |
|          | 4 (A)                         | HOMO-1 -> LUMO, 21.0<br>HOMO-3 -> LUMO, 73.1                                                  | 3.66       | 29520                    | 339            | 0.341               |
|          | 5 (B)                         | HOMO-6 -> LUMO, 30.6<br>HOMO-11 -> LUMO, 45.3<br>HOMO-13 -> LUMO, 11.9                        | 3.92       | 31617                    | 317            | 0.006               |
| A5       | 1 (B)                         | HOMO -> LUMO, 98.4                                                                            | 1.86       | 15002                    | 666            | 0.896               |
|          | 2 (B)                         | HOMO-2 -> LUMO, 88.9                                                                          | 3.22       | 25971                    | 385            | 0.029               |
|          | 3 (A)                         | HOMO-1 -> LUMO, 49.0<br>HOMO-3 -> LUMO, 28.9<br>HOMO-5 -> LUMO, 15.2                          | 3.42       | 27584                    | 363            | 0.569               |
|          | 4 (A)                         | HOMO-1 -> LUMO, 46.7<br>HOMO-3 -> LUMO, 38.7<br>HOMO-5 -> LUMO, 7.9                           | 3.61       | 29117                    | 343            | 0.294               |
|          | 5 (B)                         | HOMO-7 -> LUMO, 28.2<br>HOMO-8 -> LUMO, 11.5<br>HOMO-11 -> LUMO, 50.5                         | 3.83       | 30891                    | 324            | 0.003               |
| A6       | 1 (B)                         | HOMO -> LUMO, 98.5                                                                            | 1.83       | 14760                    | 676            | 0.892               |
|          | 2 (B)                         | HOMO-2 -> LUMO, 91.4                                                                          | 3.02       | 24358                    | 411            | 0.020               |
|          | 3 (A)                         | HOMO-1 -> LUMO, 77.5<br>HOMO-3 -> LUMO, 17.1                                                  | 3.21       | 25891                    | 387            | 0.539               |
|          | 4 (A)                         | HOMO-1 -> LUMO, 18.5<br>HOMO-3 -> LUMO, 76.2                                                  | 3.61       | 29117                    | 343            | 0.377               |
|          | 5 (B)                         | HOMO-4 -> LUMO, 8.4<br>HOMO-10 -> LUMO, 7.9<br>HOMO-11 -> LUMO, 55.3<br>HOMO-12 -> LUMO, 18.4 | 3.92       | 31617                    | 317            | 0.009               |
| A7       | 1 (B)                         | HOMO -> LUMO, 98.5                                                                            | 1.98       | 15970                    | 627            | 0.875               |

|    |        |                                                                        |      |       |     |       |
|----|--------|------------------------------------------------------------------------|------|-------|-----|-------|
|    | 2 (B)  | HOMO-2 -> LUMO, 7.2<br>HOMO-4 -> LUMO, 80.2<br>HOMO-5 -> LUMO, 9.8     | 3.63 | 29278 | 341 | 0.043 |
|    | 3 (A)  | HOMO-1 -> LUMO, 88.0<br>HOMO-6 -> LUMO, 5.8                            | 3.72 | 30004 | 333 | 0.325 |
|    | 4 (A)  | HOMO-1 -> LUMO, 8.6<br>HOMO-3 -> LUMO, 35.1<br>HOMO-6 -> LUMO, 53.8    | 3.95 | 31859 | 314 | 0.114 |
|    | 5 (B)  | HOMO-2 -> LUMO, 14.1<br>HOMO-7 -> LUMO, 80.2                           | 4.06 | 32746 | 306 | 0.019 |
| B1 | 1 (B)  | HOMO -> LUMO, 99.0                                                     | 2.33 | 18793 | 531 | 0.824 |
|    | 2 (B)  | HOMO-1 -> LUMO, 93.5                                                   | 3.02 | 24358 | 411 | 0.002 |
|    | 3 (A)  | HOMO-2 -> LUMO, 94.4                                                   | 3.22 | 25971 | 385 | 0.322 |
|    | 4 (B)  | HOMO-4 -> LUMO, 28.2<br>HOMO-7 -> LUMO, 66.9                           | 3.84 | 30972 | 323 | 0.005 |
|    | 5 (A)  | HOMO-3 -> LUMO, 95.3                                                   | 4.09 | 32988 | 303 | 0.000 |
| B2 | 1 (A)  | HOMO -> LUMO, 98.8                                                     | 2.12 | 17099 | 585 | 0.731 |
|    | 2 (A)  | HOMO-1 -> LUMO, 10.7<br>HOMO-2 -> LUMO, 84.1                           | 2.81 | 22664 | 441 | 0.044 |
|    | 3 (A)  | HOMO-1 -> LUMO, 85.3<br>HOMO-2 -> LUMO, 10.6                           | 2.88 | 23229 | 430 | 0.357 |
|    | 4 (A)  | HOMO-3 -> LUMO, 45.9<br>HOMO-4 -> LUMO, 21.5<br>HOMO-7 -> LUMO, 28.6   | 3.85 | 31053 | 322 | 0.030 |
|    | 5 (A)  | HOMO-3 -> LUMO, 51.4<br>HOMO-4 -> LUMO, 22.8<br>HOMO-7 -> LUMO, 22.2   | 3.97 | 32020 | 312 | 0.001 |
| B3 | 1 (B)  | HOMO -> LUMO, 99.2                                                     | 2.08 | 16776 | 597 | 0.723 |
|    | 2 (B)  | HOMO-2 -> LUMO, 94.9                                                   | 2.81 | 22664 | 440 | 0.049 |
|    | 3 (A)  | HOMO-1 -> LUMO, 96.4                                                   | 2.85 | 22987 | 435 | 0.377 |
|    | 4 (B)  | HOMO-5 -> LUMO, 5.2<br>HOMO-7 -> LUMO, 90.4                            | 4.01 | 32343 | 309 | 0.002 |
|    | 5 (B)  | HOMO-3 -> LUMO, 58.1<br>HOMO-5 -> LUMO, 34.5                           | 4.70 | 37908 | 264 | 0.001 |
| B4 | 1 (B)  | HOMO -> LUMO, 98.9                                                     | 2.34 | 18873 | 529 | 0.818 |
|    | 2 (B)  | HOMO-1 -> LUMO, 93.7                                                   | 3.08 | 24842 | 402 | 0.012 |
|    | 3 (A)  | HOMO-2 -> LUMO, 93.7                                                   | 3.32 | 26778 | 374 | 0.293 |
|    | 4 (B)  | HOMO-3 -> LUMO, 28.3<br>HOMO-7 -> LUMO, 34.7<br>HOMO-9 -> LUMO, 29.9   | 3.87 | 31214 | 320 | 0.001 |
|    | 5 (A)  | HOMO-3 -> LUMO+1, 5.1<br>HOMO-4 -> LUMO, 85.2                          | 4.44 | 35811 | 279 | 0.000 |
| B5 | 1 (B)  | HOMO -> LUMO, 98.8                                                     | 2.33 | 18793 | 532 | 0.790 |
|    | 2 (B)  | HOMO-1 -> LUMO, 95.6                                                   | 3.17 | 25568 | 391 | 0.027 |
|    | 3 (A)  | HOMO-2 -> LUMO, 95.8                                                   | 3.43 | 27665 | 362 | 0.261 |
|    | 4 (B)  | HOMO-4 -> LUMO, 27.0<br>HOMO-5 -> LUMO, 12.7<br>HOMO-7 -> LUMO, 60.5   | 3.79 | 30569 | 327 | 0.005 |
|    | 5 (A)  | HOMO-3 -> LUMO, 94.7                                                   | 4.14 | 33392 | 299 | 0.000 |
| B6 | 1 (B)  | HOMO -> LUMO, 99.0                                                     | 2.27 | 18309 | 545 | 0.794 |
|    | 2 (B)  | HOMO-1 -> LUMO, 94.3                                                   | 3.00 | 24197 | 413 | 0.009 |
|    | 3 (A)  | HOMO-2 -> LUMO, 94.4                                                   | 3.24 | 26132 | 383 | 0.308 |
|    | 4 (B)  | HOMO-5 -> LUMO, 8.3<br>HOMO-7 -> LUMO, 21.1<br>HOMO-8 -> LUMO, 64.8    | 3.86 | 31133 | 321 | 0.002 |
|    | 5 (A)  | HOMO-3 -> LUMO+2, 2.4<br>HOMO-3 -> LUMO, 87.3<br>HOMO-4 -> LUMO+1, 8.1 | 4.13 | 33311 | 301 | 0.002 |
| B7 | 1 (B2) | HOMO -> LUMO, 97.8                                                     | 2.51 | 20245 | 493 | 0.696 |
|    | 2 (B2) | HOMO-1 -> LUMO, 97.1                                                   | 3.69 | 29763 | 336 | 0.105 |
|    | 3 (A1) | HOMO-2 -> LUMO, 98.3                                                   | 3.97 | 32021 | 312 | 0.055 |

|    |        |                                                                                                                       |      |       |     |       |
|----|--------|-----------------------------------------------------------------------------------------------------------------------|------|-------|-----|-------|
|    | 4 (B1) | HOMO-3 -> LUMO, 97.4                                                                                                  | 4.01 | 32344 | 309 | 0.002 |
|    | 5 (A2) | HOMO -> LUMO+3, 9.5<br>HOMO -> LUMO+1, 80.9                                                                           | 5.58 | 45007 | 222 | 0.000 |
| C1 | 1 (A)  | HOMO -> LUMO, 98.3                                                                                                    | 2.12 | 17099 | 584 | 0.902 |
|    | 2 (A)  | HOMO-1 -> LUMO, 89.4                                                                                                  | 2.97 | 23955 | 418 | 0.011 |
|    | 3 (A)  | HOMO-2 -> LUMO, 90.4                                                                                                  | 3.16 | 25487 | 392 | 0.446 |
|    | 4 (A)  | HOMO-4 -> LUMO, 38.0<br>HOMO-11 -> LUMO, 51.3                                                                         | 3.78 | 30488 | 328 | 0.033 |
|    | 5 (A)  | HOMO-3 -> LUMO, 95.2                                                                                                  | 4.00 | 32262 | 310 | 0.004 |
| C2 | 1 (A)  | HOMO -> LUMO, 98.4                                                                                                    | 1.98 | 15970 | 625 | 0.842 |
|    | 2 (A)  | HOMO-1 -> LUMO, 75.7<br>HOMO-2 -> LUMO, 18.1                                                                          | 2.70 | 21777 | 459 | 0.036 |
|    | 3 (A)  | HOMO-1 -> LUMO, 18.8<br>HOMO-2 -> LUMO, 76.5                                                                          | 2.83 | 22826 | 438 | 0.476 |
|    | 4 (A)  | HOMO-3 -> LUMO, 51.4<br>HOMO-6 -> LUMO, 19.0<br>HOMO-7 -> LUMO, 13.7<br>HOMO-11 -> LUMO, 6.1                          | 3.82 | 30811 | 325 | 0.040 |
|    | 5 (A)  | HOMO-3 -> LUMO, 37.3<br>HOMO-6 -> LUMO, 16.1<br>HOMO-7 -> LUMO, 6.7<br>HOMO-11 -> LUMO, 29.4                          | 3.85 | 31053 | 322 | 0.099 |
| C3 | 1 (A)  | HOMO -> LUMO, 98.7                                                                                                    | 1.95 | 15728 | 637 | 0.832 |
|    | 2 (A)  | HOMO-1 -> LUMO, 35.5<br>HOMO-2 -> LUMO, 58.4                                                                          | 2.69 | 21697 | 461 | 0.029 |
|    | 3 (A)  | HOMO-1 -> LUMO, 59.8<br>HOMO-2 -> LUMO, 36.0                                                                          | 2.79 | 22503 | 445 | 0.505 |
|    | 4 (A)  | HOMO-4 -> LUMO, 20.4<br>HOMO-5 -> LUMO, 33.9<br>HOMO-10 -> LUMO, 7.1<br>HOMO-11 -> LUMO, 26.8                         | 3.90 | 31456 | 318 | 0.190 |
|    | 5 (A)  | HOMO-3 -> LUMO, 71.5<br>HOMO-4 -> LUMO, 17.8                                                                          | 4.08 | 32908 | 304 | 0.006 |
| C4 | 1 (A)  | HOMO -> LUMO, 98.2                                                                                                    | 2.11 | 17018 | 587 | 0.895 |
|    | 2 (A)  | HOMO-1 -> LUMO, 89.6                                                                                                  | 3.06 | 24681 | 405 | 0.022 |
|    | 3 (A)  | HOMO-2 -> LUMO, 86.8<br>HOMO-5 -> LUMO, 5.0                                                                           | 3.27 | 26375 | 379 | 0.420 |
|    | 4 (A)  | HOMO-4 -> LUMO, 9.4<br>HOMO-5 -> LUMO, 20.2<br>HOMO-6 -> LUMO, 15.4<br>HOMO-11 -> LUMO, 26.7<br>HOMO-13 -> LUMO, 14.6 | 3.81 | 30730 | 325 | 0.083 |
|    | 5 (A)  | HOMO-4 -> LUMO, 9.0<br>HOMO-5 -> LUMO, 43.9<br>HOMO-6 -> LUMO, 12.2<br>HOMO-11 -> LUMO, 10.7                          | 4.03 | 32504 | 308 | 0.321 |
| C5 | 1 (A)  | HOMO -> LUMO, 98.2                                                                                                    | 2.09 | 16857 | 593 | 0.871 |
|    | 2 (A)  | HOMO-1 -> LUMO, 87.6<br>HOMO-2 -> LUMO, 5.1                                                                           | 3.17 | 25568 | 391 | 0.034 |
|    | 3 (A)  | HOMO-2 -> LUMO, 57.7<br>HOMO-5 -> LUMO, 33.3                                                                          | 3.41 | 27504 | 364 | 0.380 |
|    | 4 (A)  | HOMO-2 -> LUMO, 8.9<br>HOMO-5 -> LUMO, 17.8<br>HOMO-7 -> LUMO, 12.5<br>HOMO-8 -> LUMO, 5.7<br>HOMO-11 -> LUMO, 41.2   | 3.73 | 30085 | 332 | 0.068 |
|    | 5 (A)  | HOMO-2 -> LUMO, 22.2<br>HOMO-4 -> LUMO, 9.1<br>HOMO-5 -> LUMO, 27.4<br>HOMO-7 -> LUMO, 17.0<br>HOMO-11 -> LUMO, 12.6  | 3.96 | 31940 | 313 | 0.329 |
| C6 | 1 (A)  | HOMO -> LUMO, 98.3                                                                                                    | 2.05 | 16535 | 604 | 0.871 |

|    |         |                                                                                                                        |      |       |     |       |
|----|---------|------------------------------------------------------------------------------------------------------------------------|------|-------|-----|-------|
|    | 2 (A)   | HOMO-1 -> LUMO, 89.9                                                                                                   | 2.98 | 24036 | 416 | 0.023 |
|    | 3 (A)   | HOMO-2 -> LUMO, 87.7                                                                                                   | 3.21 | 25891 | 387 | 0.422 |
|    | 4 (A)   | HOMO-4 -> LUMO, 12.9<br>HOMO-5 -> LUMO, 24.4<br>HOMO-11 -> LUMO, 8.2<br>HOMO-12 -> LUMO, 30.3<br>HOMO-13 -> LUMO, 11.1 | 3.79 | 30569 | 327 | 0.130 |
|    | 5 (A)   | HOMO-4 -> LUMO, 8.0<br>HOMO-5 -> LUMO, 42.5<br>HOMO-12 -> LUMO, 22.2                                                   | 3.99 | 32182 | 311 | 0.274 |
| C7 | 1 (A'') | HOMO -> LUMO, 98.0                                                                                                     | 2.22 | 17906 | 559 | 0.829 |
|    | 2 (A'') | HOMO-4 -> LUMO, 81.4<br>HOMO-5 -> LUMO, 15.9                                                                           | 3.64 | 29359 | 341 | 0.077 |
|    | 3 (A')  | HOMO-1 -> LUMO, 38.7<br>HOMO-6 -> LUMO, 13.2<br>HOMO-7 -> LUMO, 42.7                                                   | 3.93 | 31698 | 316 | 0.067 |
|    | 4 (A')  | HOMO-6 -> LUMO, 80.3<br>HOMO-7 -> LUMO, 16.2                                                                           | 3.95 | 31859 | 314 | 0.065 |
|    | 5 (A'') | HOMO-2 -> LUMO, 93.8                                                                                                   | 4.12 | 33230 | 301 | 0.015 |
| D1 | 1 (B)   | HOMO -> LUMO, 99.1                                                                                                     | 2.41 | 19438 | 515 | 0.768 |
|    | 2 (B)   | HOMO-2 -> LUMO, 93.7                                                                                                   | 2.90 | 23390 | 427 | 0.003 |
|    | 3 (A)   | HOMO-1 -> LUMO, 94.7                                                                                                   | 3.08 | 24842 | 403 | 0.290 |
|    | 4 (B)   | HOMO-4 -> LUMO, 36.4<br>HOMO-7 -> LUMO, 58.4                                                                           | 3.72 | 30004 | 333 | 0.007 |
|    | 5 (A)   | HOMO-3 -> LUMO, 96.4                                                                                                   | 3.90 | 31456 | 318 | 0.000 |
| D2 | 1 (A)   | HOMO -> LUMO, 98.5                                                                                                     | 2.12 | 17099 | 586 | 0.628 |
|    | 2 (A)   | HOMO-1 -> LUMO, 89.2<br>HOMO-2 -> LUMO, 7.0                                                                            | 2.75 | 22180 | 451 | 0.300 |
|    | 3 (A)   | HOMO-1 -> LUMO, 7.1<br>HOMO-2 -> LUMO, 87.5                                                                            | 2.78 | 22422 | 447 | 0.113 |
|    | 4 (A)   | HOMO-3 -> LUMO, 64.3<br>HOMO-4 -> LUMO, 19.4<br>HOMO-7 -> LUMO, 13.3                                                   | 3.71 | 29923 | 334 | 0.036 |
|    | 5 (A)   | HOMO-3 -> LUMO, 31.8<br>HOMO-4 -> LUMO, 54.5<br>HOMO-7 -> LUMO, 10.6                                                   | 3.83 | 30891 | 324 | 0.010 |
| D3 | 1 (B)   | HOMO -> LUMO, 98.9                                                                                                     | 2.07 | 16696 | 599 | 0.624 |
|    | 2 (A)   | HOMO-1 -> LUMO, 96.6                                                                                                   | 2.72 | 21938 | 456 | 0.334 |
|    | 3 (B)   | HOMO-2 -> LUMO, 94.9                                                                                                   | 2.78 | 22422 | 446 | 0.102 |
|    | 4 (B)   | HOMO-7 -> LUMO, 94.5                                                                                                   | 3.92 | 31617 | 316 | 0.002 |
|    | 5 (B)   | HOMO-3 -> LUMO, 71.7<br>HOMO-5 -> LUMO, 22.5                                                                           | 4.65 | 37505 | 267 | 0.001 |

|    |       |                                                                        |      |       |     |       |
|----|-------|------------------------------------------------------------------------|------|-------|-----|-------|
| A7 | 1 (B) | HOMO -> LUMO, 98.5                                                     | 1.98 | 15970 | 627 | 0.875 |
|    | 2 (B) | HOMO-2 -> LUMO, 7.2<br>HOMO-4 -> LUMO, 80.2<br>HOMO-5 -> LUMO, 9.8     | 3.63 | 29278 | 341 | 0.043 |
|    | 3 (A) | HOMO-1 -> LUMO, 88.0<br>HOMO-6 -> LUMO, 5.8                            | 3.72 | 30004 | 333 | 0.325 |
|    | 4 (A) | HOMO-1 -> LUMO, 8.6<br>HOMO-3 -> LUMO, 35.1<br>HOMO-6 -> LUMO, 53.8    | 3.95 | 31859 | 314 | 0.114 |
|    | 5 (B) | HOMO-2 -> LUMO, 14.1<br>HOMO-7 -> LUMO, 80.2                           | 4.06 | 32746 | 306 | 0.019 |
| B1 | 1 (B) | HOMO -> LUMO, 98.9                                                     | 2.36 | 19035 | 525 | 0.820 |
|    | 2 (B) | HOMO-1 -> LUMO, 93.5                                                   | 3.06 | 24681 | 405 | 0.005 |
|    | 3 (A) | HOMO-2 -> LUMO, 94.5                                                   | 3.26 | 26294 | 381 | 0.330 |
|    | 4 (B) | HOMO-4 -> LUMO, 27.0<br>HOMO-7 -> LUMO, 67.8                           | 3.86 | 31133 | 321 | 0.006 |
|    | 5 (A) | HOMO-3 -> LUMO, 95.0                                                   | 4.12 | 33230 | 301 | 0.000 |
| B2 | 1 (A) | HOMO -> LUMO, 98.8                                                     | 2.15 | 17341 | 576 | 0.736 |
|    | 2 (A) | HOMO-1 -> LUMO, 11.1<br>HOMO-2 -> LUMO, 83.7                           | 2.83 | 22826 | 438 | 0.035 |
|    | 3 (A) | HOMO-1 -> LUMO, 85.0<br>HOMO-2 -> LUMO, 11.1                           | 2.91 | 23471 | 426 | 0.366 |
|    | 4 (A) | HOMO-3 -> LUMO, 43.5<br>HOMO-4 -> LUMO, 20.0<br>HOMO-7 -> LUMO, 31.8   | 3.87 | 31214 | 320 | 0.027 |
|    | 5 (A) | HOMO-3 -> LUMO, 53.5<br>HOMO-4 -> LUMO, 21.5<br>HOMO-7 -> LUMO, 21.0   | 4.00 | 32262 | 310 | 0.001 |
| B3 | 1 (B) | HOMO -> LUMO, 99.1                                                     | 2.12 | 17099 | 586 | 0.045 |
|    | 2 (B) | HOMO-2 -> LUMO, 95.1                                                   | 2.83 | 22826 | 438 | 0.382 |
|    | 3 (A) | HOMO-1 -> LUMO, 96.5                                                   | 2.88 | 23229 | 431 | 0.003 |
|    | 4 (B) | HOMO-5 -> LUMO, 9.1<br>HOMO-6 -> LUMO, 94.6                            | 4.03 | 32504 | 308 | 0.002 |
|    | 5 (B) | HOMO-3 -> LUMO, 56.3<br>HOMO-2 -> LUMO, 35.3                           | 4.75 | 38312 | 261 | 0.202 |
| B4 | 1 (B) | HOMO -> LUMO, 98.8                                                     | 2.37 | 19116 | 524 | 0.813 |
|    | 2 (B) | HOMO-1 -> LUMO, 93.7                                                   | 3.13 | 25245 | 396 | 0.018 |
|    | 3 (A) | HOMO-2 -> LUMO, 93.7                                                   | 3.36 | 27020 | 369 | 0.303 |
|    | 4 (B) | HOMO-3 -> LUMO, 27.6<br>HOMO-7 -> LUMO, 41.8<br>HOMO-8 -> LUMO, 23.0   | 3.90 | 31456 | 318 | 0.000 |
|    | 5 (A) | HOMO-3 -> LUMO+3, 2.6<br>HOMO-3 -> LUMO+1, 5.4<br>HOMO-4 -> LUMO, 84.6 | 4.48 | 36134 | 277 | 0.000 |
| B5 | 1 (B) | HOMO -> LUMO, 98.8                                                     | 2.35 | 18954 | 527 | 0.785 |
|    | 2 (B) | HOMO-1 -> LUMO, 95.6                                                   | 3.23 | 26052 | 384 | 0.034 |
|    | 3 (A) | HOMO-2 -> LUMO, 95.8                                                   | 3.48 | 28068 | 357 | 0.272 |
|    | 4 (B) | HOMO-4 -> LUMO, 20.5<br>HOMO-5 -> LUMO, 12.3<br>HOMO-7 -> LUMO, 61.1   | 3.82 | 30811 | 325 | 0.005 |
|    | 5 (A) | HOMO-3 -> LUMO, 94.4                                                   | 4.19 | 33795 | 296 | 0.000 |
| B6 | 1 (B) | HOMO -> LUMO, 98.9                                                     | 2.30 | 18551 | 539 | 0.789 |
|    | 2 (B) | HOMO-1 -> LUMO, 94.3                                                   | 3.05 | 24600 | 407 | 0.014 |
|    | 3 (A) | HOMO-2 -> LUMO, 94.6                                                   | 3.28 | 26455 | 378 | 0.319 |
|    | 4 (B) | HOMO-5 -> LUMO, 8.3<br>HOMO-7 -> LUMO, 37.9<br>HOMO-8 -> LUMO, 47.8    | 3.89 | 31375 | 319 | 0.002 |
|    | 5 (A) | HOMO-3 -> LUMO, 86.6<br>HOMO-4 -> LUMO+1, 8.5                          | 4.16 | 33553 | 298 | 0.002 |

|    |         |                                                                                                                       |      |       |     |       |
|----|---------|-----------------------------------------------------------------------------------------------------------------------|------|-------|-----|-------|
| B7 | 1 (A'') | HOMO -> LUMO, 98.0                                                                                                    | 2.53 | 20406 | 491 | 0.695 |
|    | 2 (A'') | HOMO-1 -> LUMO, 97.4                                                                                                  | 3.76 | 30327 | 330 | 0.108 |
|    | 3 (A')  | HOMO-2 -> LUMO, 63.4<br>HOMO-3 -> LUMO, 34.4                                                                          | 4.03 | 32504 | 307 | 0.039 |
|    | 4 (A')  | HOMO-2 -> LUMO, 34.6<br>HOMO-3 -> LUMO, 62.6                                                                          | 4.03 | 32504 | 307 | 0.025 |
|    | 5 (A'') | HOMO -> LUMO+3, 13.9<br>HOMO -> LUMO+1, 76.6                                                                          | 5.59 | 45087 | 222 | 0.000 |
| C1 | 1 (A)   | HOMO -> LUMO, 98.3                                                                                                    | 2.12 | 17099 | 584 | 0.902 |
|    | 2 (A)   | HOMO-1 -> LUMO, 89.4                                                                                                  | 2.97 | 23955 | 418 | 0.011 |
|    | 3 (A)   | HOMO-2 -> LUMO, 90.4                                                                                                  | 3.16 | 25487 | 392 | 0.446 |
|    | 4 (A)   | HOMO-4 -> LUMO, 38.0<br>HOMO-11 -> LUMO, 51.3                                                                         | 3.78 | 30488 | 328 | 0.033 |
|    | 5 (A)   | HOMO-3 -> LUMO, 95.2                                                                                                  | 4.00 | 32262 | 310 | 0.004 |
| C2 | 1 (A)   | HOMO -> LUMO, 98.4                                                                                                    | 1.98 | 15970 | 625 | 0.842 |
|    | 2 (A)   | HOMO-1 -> LUMO, 75.7<br>HOMO-2 -> LUMO, 18.1                                                                          | 2.70 | 21777 | 459 | 0.036 |
|    | 3 (A)   | HOMO-1 -> LUMO, 18.8<br>HOMO-2 -> LUMO, 76.5                                                                          | 2.83 | 22826 | 438 | 0.476 |
|    | 4 (A)   | HOMO-3 -> LUMO, 51.4<br>HOMO-6 -> LUMO, 19.0<br>HOMO-7 -> LUMO, 13.7<br>HOMO-11 -> LUMO, 6.1                          | 3.82 | 30811 | 325 | 0.040 |
|    | 5 (A)   | HOMO-3 -> LUMO, 37.3<br>HOMO-6 -> LUMO, 16.1<br>HOMO-7 -> LUMO, 6.7<br>HOMO-11 -> LUMO, 29.4                          | 3.85 | 31053 | 322 | 0.099 |
| C3 | 1 (A)   | HOMO -> LUMO, 98.7                                                                                                    | 1.95 | 15728 | 637 | 0.832 |
|    | 2 (A)   | HOMO-1 -> LUMO, 35.5<br>HOMO-2 -> LUMO, 58.4                                                                          | 2.69 | 21697 | 461 | 0.029 |
|    | 3 (A)   | HOMO-1 -> LUMO, 59.8<br>HOMO-2 -> LUMO, 36.0                                                                          | 2.79 | 22503 | 445 | 0.505 |
|    | 4 (A)   | HOMO-4 -> LUMO, 20.4<br>HOMO-5 -> LUMO, 33.9<br>HOMO-10 -> LUMO, 7.1<br>HOMO-11 -> LUMO, 26.8                         | 3.90 | 31456 | 318 | 0.190 |
|    | 5 (A)   | HOMO-3 -> LUMO, 71.5<br>HOMO-4 -> LUMO, 17.8                                                                          | 4.08 | 32908 | 304 | 0.006 |
| C4 | 1 (A)   | HOMO -> LUMO, 98.2                                                                                                    | 2.11 | 17018 | 587 | 0.895 |
|    | 2 (A)   | HOMO-1 -> LUMO, 89.6                                                                                                  | 3.06 | 24681 | 405 | 0.022 |
|    | 3 (A)   | HOMO-2 -> LUMO, 86.8<br>HOMO-5 -> LUMO, 5.0                                                                           | 3.27 | 26375 | 379 | 0.420 |
|    | 4 (A)   | HOMO-4 -> LUMO, 9.4<br>HOMO-5 -> LUMO, 20.2<br>HOMO-6 -> LUMO, 15.4<br>HOMO-11 -> LUMO, 26.7<br>HOMO-13 -> LUMO, 14.6 | 3.81 | 30730 | 325 | 0.083 |
|    | 5 (A)   | HOMO-4 -> LUMO, 9.0<br>HOMO-5 -> LUMO, 43.9<br>HOMO-6 -> LUMO, 12.2<br>HOMO-11 -> LUMO, 10.7                          | 4.03 | 32504 | 308 | 0.321 |

|    |         |                                                                                                                        |      |       |     |       |
|----|---------|------------------------------------------------------------------------------------------------------------------------|------|-------|-----|-------|
| C5 | 1 (A)   | HOMO -> LUMO, 98.2                                                                                                     | 2.09 | 16857 | 593 | 0.871 |
|    | 2 (A)   | HOMO-1 -> LUMO, 87.6<br>HOMO-2 -> LUMO, 5.1                                                                            | 3.17 | 25568 | 391 | 0.034 |
|    | 3 (A)   | HOMO-2 -> LUMO, 57.7<br>HOMO-5 -> LUMO, 33.3                                                                           | 3.41 | 27504 | 364 | 0.380 |
|    | 4 (A)   | HOMO-2 -> LUMO, 8.9<br>HOMO-5 -> LUMO, 17.8<br>HOMO-7 -> LUMO, 12.5<br>HOMO-8 -> LUMO, 5.7<br>HOMO-11 -> LUMO, 41.2    | 3.73 | 30085 | 332 | 0.068 |
|    | 5 (A)   | HOMO-2 -> LUMO, 22.2<br>HOMO-4 -> LUMO, 9.1<br>HOMO-5 -> LUMO, 27.4<br>HOMO-7 -> LUMO, 17.0<br>HOMO-11 -> LUMO, 12.6   | 3.96 | 31940 | 313 | 0.329 |
| C6 | 1 (A)   | HOMO -> LUMO, 98.3                                                                                                     | 2.05 | 16535 | 604 | 0.871 |
|    | 2 (A)   | HOMO-1 -> LUMO, 89.9                                                                                                   | 2.98 | 24036 | 416 | 0.023 |
|    | 3 (A)   | HOMO-2 -> LUMO, 87.7                                                                                                   | 3.21 | 25891 | 387 | 0.422 |
|    | 4 (A)   | HOMO-4 -> LUMO, 12.9<br>HOMO-5 -> LUMO, 24.4<br>HOMO-11 -> LUMO, 8.2<br>HOMO-12 -> LUMO, 30.3<br>HOMO-13 -> LUMO, 11.1 | 3.79 | 30569 | 327 | 0.130 |
|    | 5 (A)   | HOMO-4 -> LUMO, 8.0<br>HOMO-5 -> LUMO, 42.5<br>HOMO-12 -> LUMO, 22.2                                                   | 3.99 | 32182 | 311 | 0.274 |
| C7 | 1 (A'') | HOMO -> LUMO, 98.0                                                                                                     | 2.22 | 17906 | 559 | 0.829 |
|    | 2 (A'') | HOMO-4 -> LUMO, 81.4<br>HOMO-5 -> LUMO, 15.9                                                                           | 3.64 | 29359 | 341 | 0.077 |
|    | 3 (A')  | HOMO-1 -> LUMO, 38.7<br>HOMO-6 -> LUMO, 13.2<br>HOMO-7 -> LUMO, 42.7                                                   | 3.93 | 31698 | 316 | 0.067 |
|    | 4 (A')  | HOMO-6 -> LUMO, 80.3<br>HOMO-7 -> LUMO, 16.2                                                                           | 3.95 | 31859 | 314 | 0.065 |
|    | 5 (A'') | HOMO-2 -> LUMO, 93.8                                                                                                   | 4.12 | 33230 | 301 | 0.015 |
| D1 | 1 (B)   | HOMO -> LUMO, 99.1                                                                                                     | 2.41 | 19438 | 515 | 0.768 |
|    | 2 (B)   | HOMO-2 -> LUMO, 93.7                                                                                                   | 2.90 | 23390 | 427 | 0.003 |
|    | 3 (A)   | HOMO-1 -> LUMO, 94.7                                                                                                   | 3.08 | 24842 | 403 | 0.290 |
|    | 4 (B)   | HOMO-4 -> LUMO, 36.4<br>HOMO-7 -> LUMO, 58.4                                                                           | 3.72 | 30004 | 333 | 0.007 |
|    | 5 (A)   | HOMO-3 -> LUMO, 96.4                                                                                                   | 3.90 | 31456 | 318 | 0.000 |
| D2 | 1 (A)   | HOMO -> LUMO, 98.5                                                                                                     | 2.12 | 17099 | 586 | 0.628 |
|    | 2 (A)   | HOMO-1 -> LUMO, 89.2<br>HOMO-2 -> LUMO, 7.0                                                                            | 2.75 | 22180 | 451 | 0.300 |
|    | 3 (A)   | HOMO-1 -> LUMO, 7.1<br>HOMO-2 -> LUMO, 87.5                                                                            | 2.78 | 22422 | 447 | 0.113 |
|    | 4 (A)   | HOMO-3 -> LUMO, 64.3<br>HOMO-4 -> LUMO, 19.4<br>HOMO-7 -> LUMO, 13.3                                                   | 3.71 | 29923 | 334 | 0.036 |
|    | 5 (A)   | HOMO-3 -> LUMO, 31.8<br>HOMO-4 -> LUMO, 54.5<br>HOMO-7 -> LUMO, 10.6                                                   | 3.83 | 30891 | 324 | 0.010 |
| D3 | 1 (B)   | HOMO -> LUMO, 98.9                                                                                                     | 2.07 | 16696 | 599 | 0.624 |
|    | 2 (A)   | HOMO-1 -> LUMO, 96.6                                                                                                   | 2.72 | 21938 | 456 | 0.334 |
|    | 3 (B)   | HOMO-2 -> LUMO, 94.9                                                                                                   | 2.78 | 22422 | 446 | 0.102 |
|    | 4 (B)   | HOMO-7 -> LUMO, 94.5                                                                                                   | 3.92 | 31617 | 316 | 0.002 |
|    | 5 (B)   | HOMO-3 -> LUMO, 71.7<br>HOMO-5 -> LUMO, 22.5                                                                           | 4.65 | 37505 | 267 | 0.001 |

|    |        |                                                                                             |      |       |     |       |
|----|--------|---------------------------------------------------------------------------------------------|------|-------|-----|-------|
| D4 | 1 (B)  | HOMO -> LUMO, 98.9                                                                          | 2.44 | 19680 | 508 | 0.775 |
|    | 2 (B)  | HOMO-1 -> LUMO, 93.6                                                                        | 2.96 | 23874 | 419 | 0.003 |
|    | 3 (A)  | HOMO-2 -> LUMO, 93.9                                                                        | 3.18 | 25649 | 390 | 0.266 |
|    | 4 (B)  | HOMO-3 -> LUMO, 29.0<br>HOMO-7 -> LUMO, 16.1<br>HOMO-9 -> LUMO, 48.3                        | 3.77 | 30407 | 329 | 0.002 |
|    | 5 (A)  | HOMO-4 -> LUMO, 87.8                                                                        | 4.28 | 34521 | 290 | 0.001 |
| D5 | 1 (B)  | HOMO -> LUMO, 98.6                                                                          | 2.45 | 19761 | 507 | 0.739 |
|    | 2 (B)  | HOMO-1 -> LUMO, 95.3                                                                        | 3.05 | 24600 | 407 | 0.027 |
|    | 3 (A)  | HOMO-2 -> LUMO, 96.0                                                                        | 3.30 | 26617 | 375 | 0.241 |
|    | 4 (B)  | HOMO-4 -> LUMO, 25.0<br>HOMO-5 -> LUMO, 11.8<br>HOMO-7 -> LUMO, 53.8<br>HOMO-8 -> LUMO, 5.5 | 3.69 | 29762 | 336 | 0.006 |
|    | 5 (A)  | HOMO-3 -> LUMO, 96.1                                                                        | 3.97 | 32020 | 312 | 0.000 |
| D6 | 1 (B)  | HOMO -> LUMO, 99.0                                                                          | 2.38 | 19196 | 522 | 0.751 |
|    | 2 (B)  | HOMO-1 -> LUMO, 94.3                                                                        | 2.88 | 23229 | 430 | 0.002 |
|    | 3 (A)  | HOMO-2 -> LUMO, 94.7                                                                        | 3.10 | 25003 | 399 | 0.279 |
|    | 4 (B)  | HOMO-5 -> LUMO, 6.3<br>HOMO-9 -> LUMO, 84.2                                                 | 3.77 | 30407 | 329 | 0.002 |
|    | 5 (A)  | HOMO-3 -> LUMO+2, 2.0<br>HOMO-3 -> LUMO+1, 89.6<br>HOMO-4 -> LUMO, 6.6                      | 3.99 | 32182 | 311 | 0.002 |
| D7 | 1 (B2) | HOMO -> LUMO, 96.4                                                                          | 2.61 | 21051 | 475 | 0.592 |
|    | 2 (B2) | HOMO-1 -> LUMO, 96.0                                                                        | 3.62 | 29198 | 343 | 0.146 |
|    | 3 (A1) | HOMO-2 -> LUMO, 98.6                                                                        | 3.86 | 31133 | 321 | 0.062 |
|    | 4 (B1) | HOMO-3 -> LUMO, 98.1                                                                        | 3.90 | 31456 | 318 | 0.003 |
|    | 5 (A2) | HOMO-5 -> LUMO, 94.8                                                                        | 5.84 | 47103 | 212 | 0.000 |

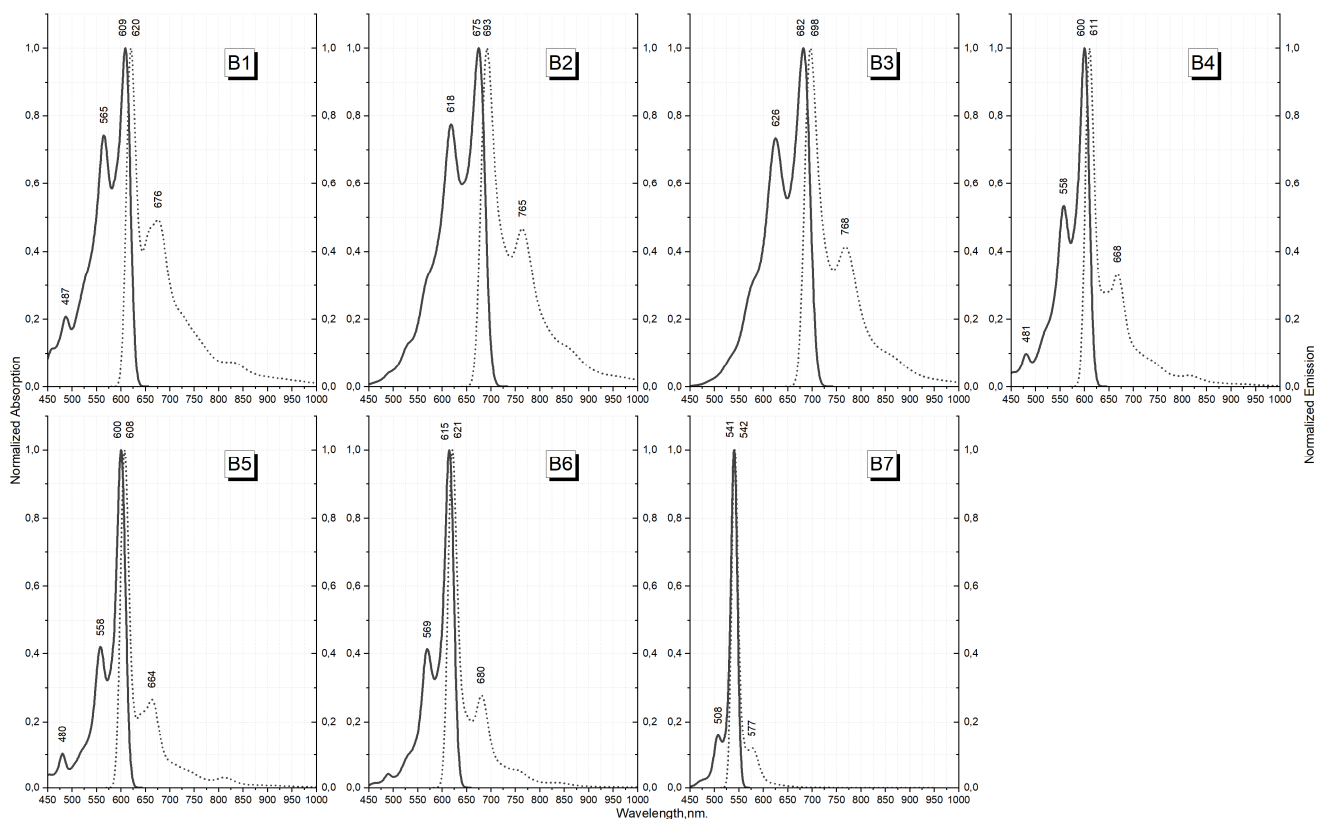

**Figure S8.** Calculated vibronic (FC, CAM-B3LYP/6-31G(d)) electronic absorption and emission spectra for **B1-B7** aza-BODIPY derivatives. Solid lines correspond to absorption and dotted lines correspond to emission.



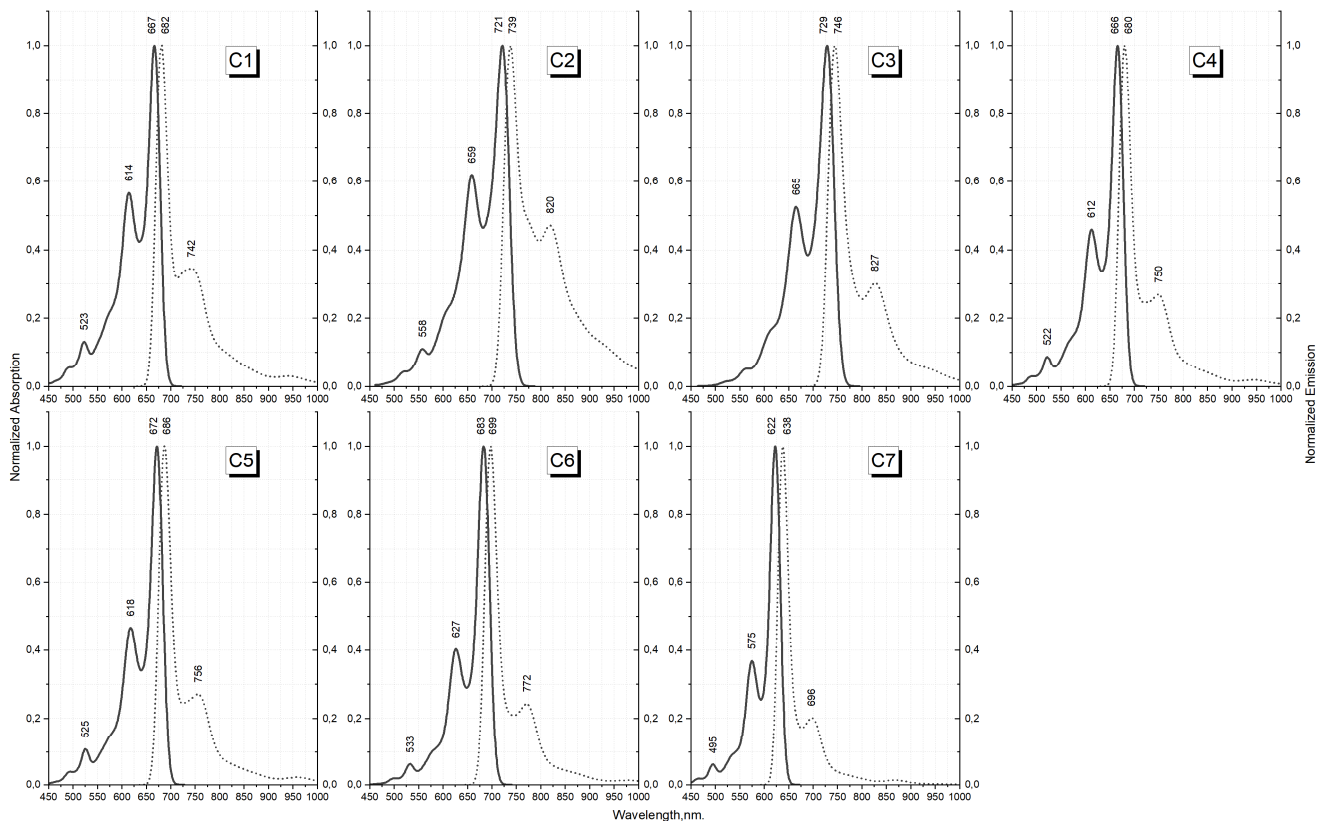

**Figure S9.** Calculated vibronic (FC, CAM-B3LYP/6-31G(d)) electronic absorption and emission spectra for **C1-C7** aza-BODIPY derivatives. Solid lines correspond to absorption and dotted lines correspond to emission.

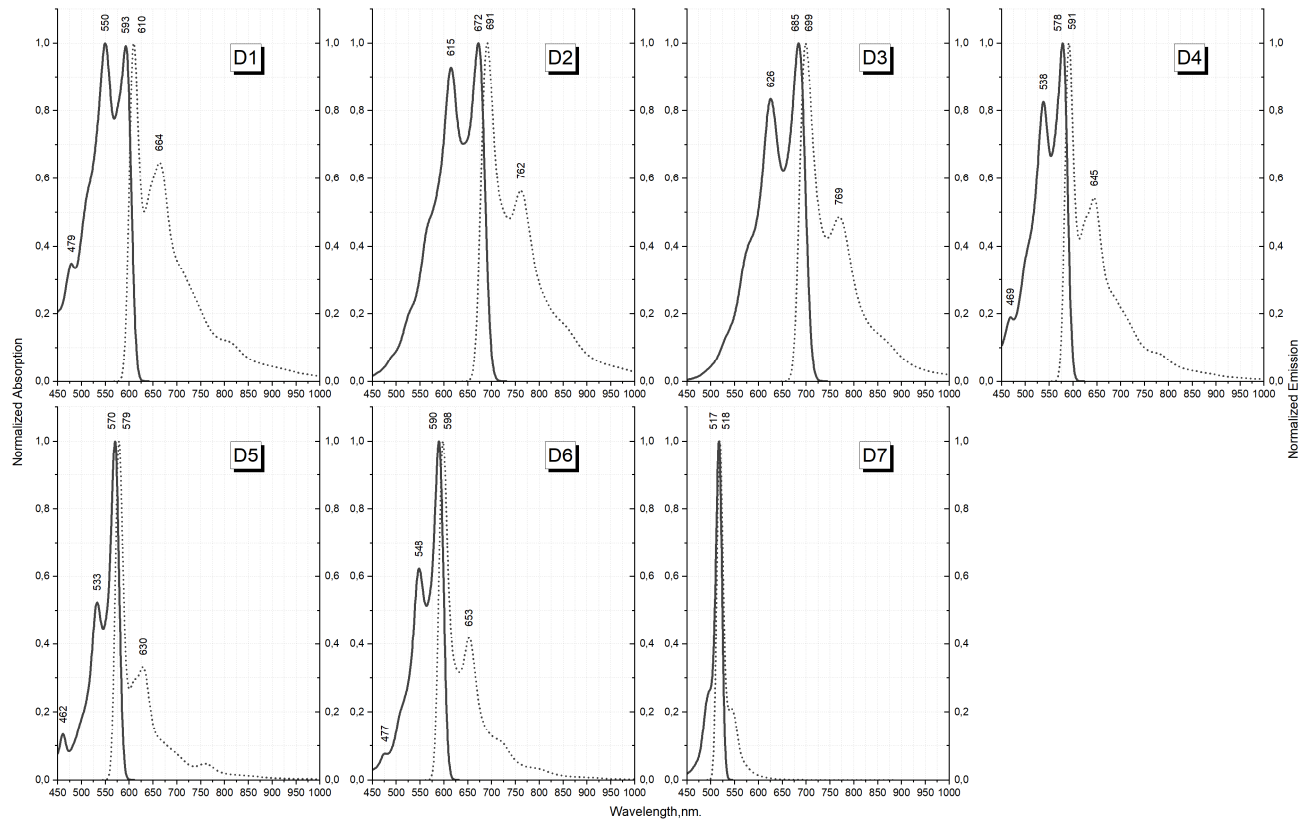

**Figure S10.** Calculated vibronic (FC, CAM-B3LYP/6-31G(d)) electronic absorption and emission spectra for **D1-D7**. Solid lines correspond to absorption and dotted lines correspond to emission.

**Table S17.** Experimental [42] and theoretical (CAM-B3LYP/6-31G(d)) bands of absorption and emission spectra.

|              |       | <b>A1</b> | <b>A2</b> | <b>C1</b> |
|--------------|-------|-----------|-----------|-----------|
| Abs main     | Exp   | 710       | 733       | 643       |
|              | Theor | 739       | 781       | 672       |
| Abs shoulder | Exp   | ~645      | ~660      | -         |
|              | Theor | 671       | 706       | 618       |
| Em main      | Exp   | 732       | 757       | 673       |
|              | Theor | 793       | 795       | 682       |
| Em shoulder  | Exp   | -         | -         | -         |
|              | Theor | 891       | 891       | 742       |

A1-A3

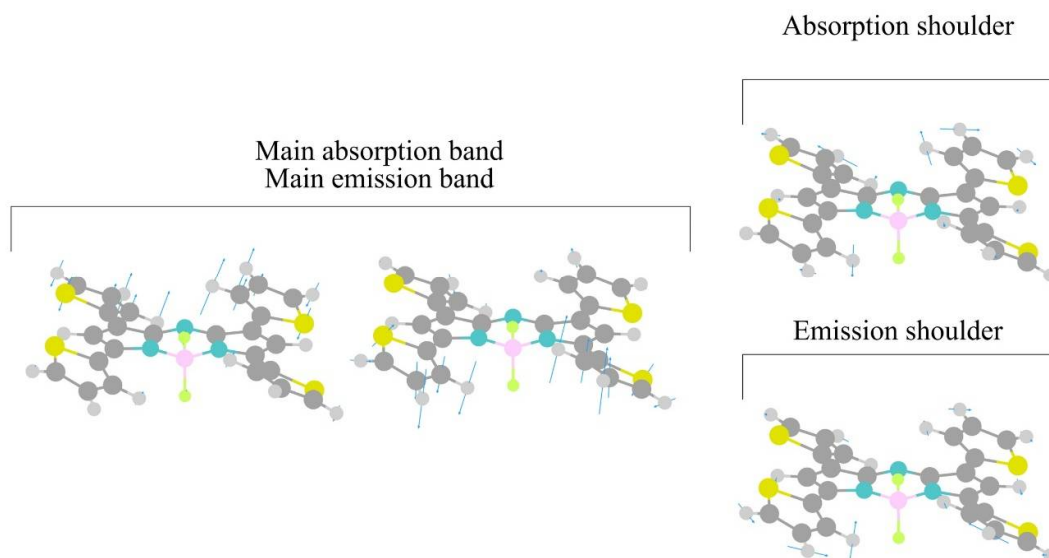

**Figure S11.** Scaled displacement vectors for some of the main molecular vibrations affecting the line shapes of absorption/emission for **A1-A3** (this is shown by the example of **A2**).

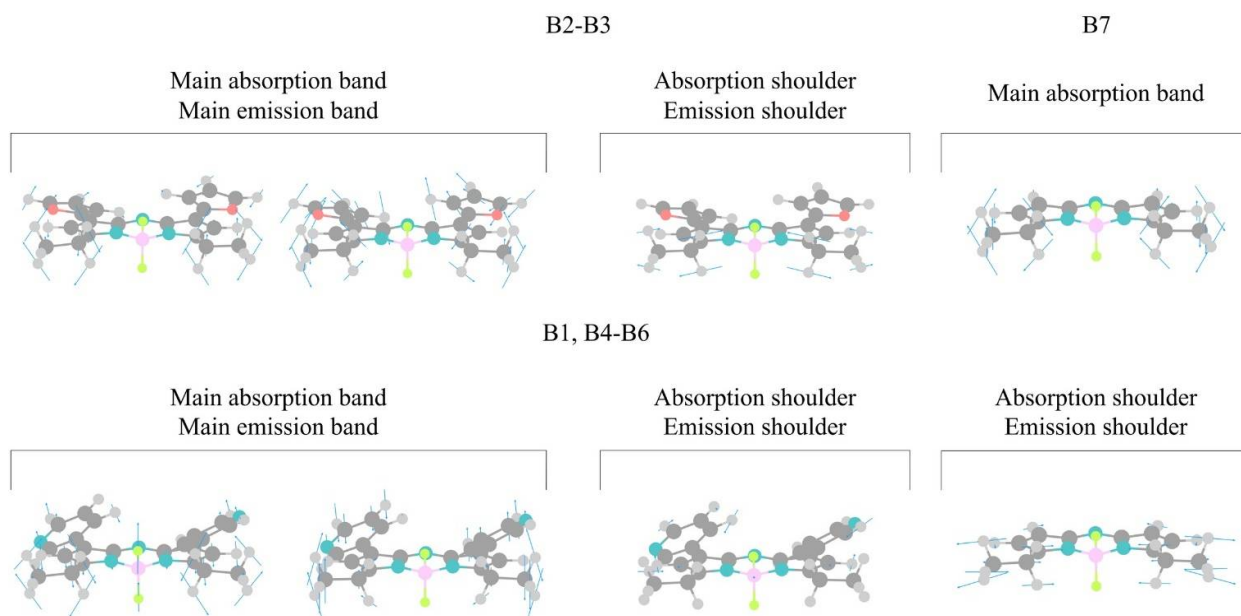

**Figure S12.** Scaled displacement vectors for some of the main molecular vibrations affecting the lineshapes of absorption/emission for **B1-B7** (for **B2-B3** – is shown by the example of **B3**, for **B1, B4-B6** – is shown by the example of **B4**).

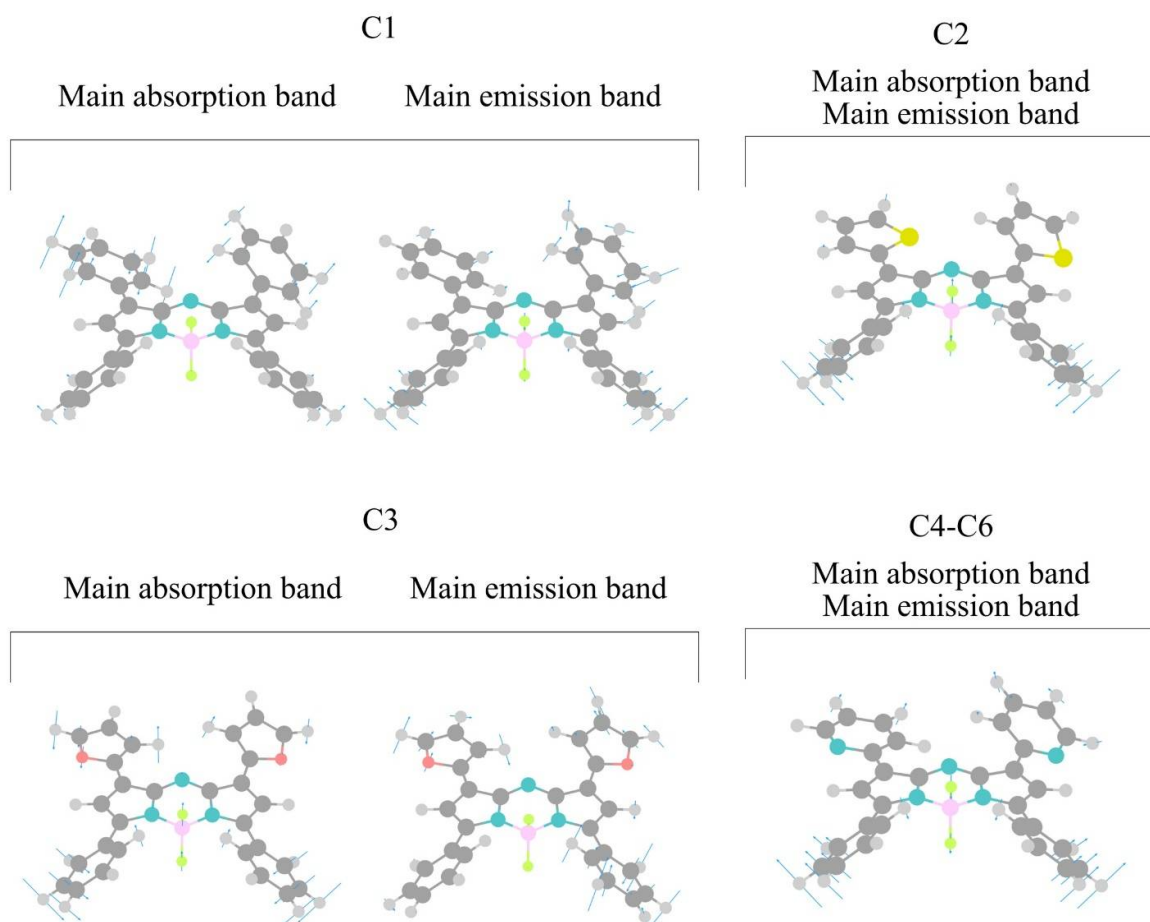

**Figure S13.** Scaled displacement vectors for some of the main molecular vibrations affecting the lineshapes of absorption/emission for **C1-C6** (for **C4-D6** – is shown by the example of **D6**).

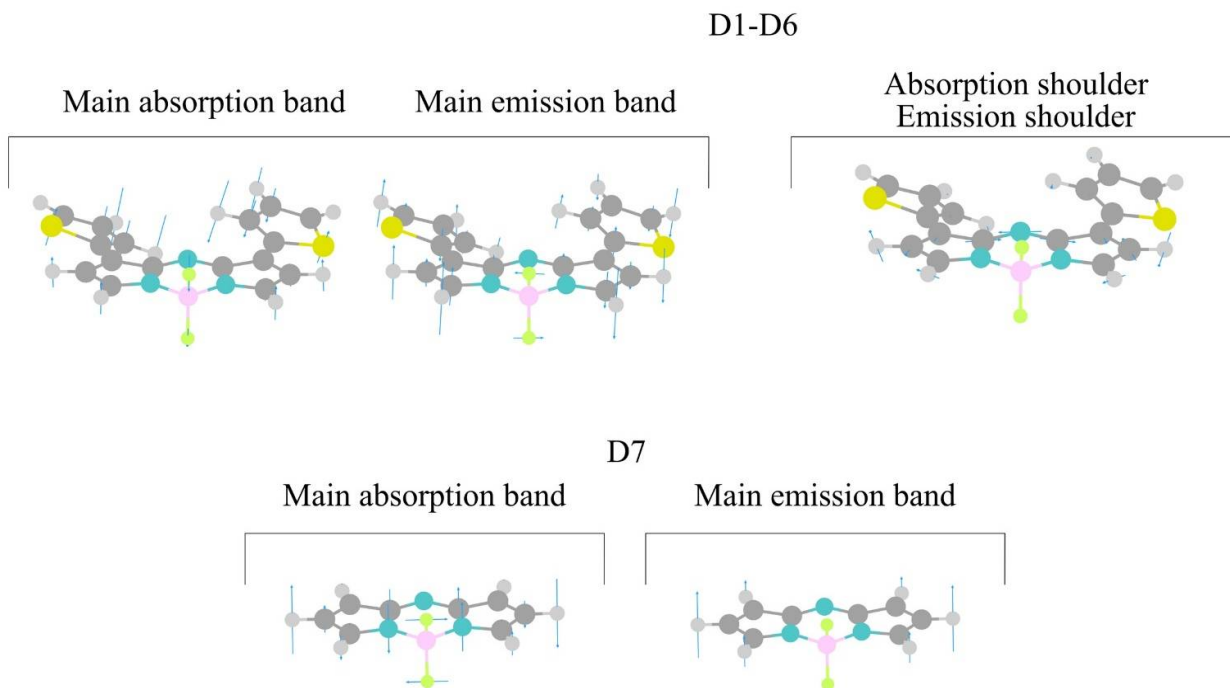

**Figure S14.** Scaled displacement vectors for some of the main molecular vibrations affecting the lineshapes of absorption/emission for **D1-D7** (for **D1-D6** – is shown by the example of **D2**).
