# Supplementary material for: Quantum Chemical Study Aimed at Modeling Efficient Aza-BODIPY NIR Dyes: Molecular and Electronic Structure, Absorption, and Emission Spectra
Source: MDPI journal article supplement (doi:10.3390/molecules25225361), 2020-11-17
Supplement: s1 [file s1]

## A1 GS CAM-B3LYP/6-31+G(d,p)

|   |              |              |              |
|---|--------------|--------------|--------------|
| N | 0.042956000  | 1.245241000  | -0.745274000 |
| C | 0.051579000  | 1.141292000  | 0.645464000  |
| C | 0.043581000  | 2.454532000  | 1.213919000  |
| C | 0.000000000  | 3.324307000  | 0.142262000  |
| C | 0.005333000  | 2.566498000  | -1.054274000 |
| N | -0.042956000 | -1.245241000 | -0.745274000 |
| C | -0.051579000 | -1.141292000 | 0.645464000  |
| C | -0.043581000 | -2.454532000 | 1.213919000  |
| C | 0.000000000  | -3.324307000 | 0.142262000  |
| C | -0.005333000 | -2.566498000 | -1.054274000 |
| B | 0.000000000  | 0.000000000  | -1.667456000 |
| N | 0.000000000  | 0.000000000  | 1.298677000  |
| F | 1.144817000  | -0.063016000 | -2.475746000 |
| F | -1.144817000 | 0.063016000  | -2.475746000 |
| C | 0.066462000  | 2.803583000  | 2.638261000  |
| H | 0.017450000  | 4.403565000  | 0.187220000  |
| C | -0.022221000 | 3.137619000  | -2.383960000 |
| C | 0.022221000  | -3.137619000 | -2.383960000 |
| H | -0.017450000 | -4.403565000 | 0.187220000  |
| C | -0.066462000 | -2.803583000 | 2.638261000  |
| C | 0.760799000  | 2.374729000  | 4.920635000  |
| C | 0.733355000  | 2.007023000  | 3.579513000  |
| C | -0.541256000 | 4.338590000  | 4.416690000  |
| C | -0.760799000 | -2.374729000 | 4.920635000  |
| C | 0.124343000  | 3.539318000  | 5.344566000  |

|   |              |              |              |
|---|--------------|--------------|--------------|
| C | -0.569338000 | 3.974483000  | 3.075717000  |
| C | -0.733355000 | -2.007023000 | 3.579513000  |
| C | -0.124343000 | -3.539318000 | 5.344566000  |
| H | 0.147017000  | 3.823225000  | 6.391909000  |
| H | -1.235828000 | -1.104025000 | 3.255150000  |
| H | -0.147017000 | -3.823225000 | 6.391909000  |
| H | -1.044392000 | 5.244741000  | 4.738681000  |
| H | -1.286204000 | -1.750494000 | 5.636469000  |
| H | -1.104683000 | 4.592956000  | 2.362485000  |
| S | 0.516381000  | -4.803452000 | -2.567738000 |
| C | 0.270221000  | -4.748083000 | -4.263697000 |
| C | -0.168862000 | -3.521425000 | -4.677223000 |
| C | -0.310029000 | -2.600280000 | -3.607686000 |
| C | 0.310029000  | 2.600280000  | -3.607686000 |
| C | 0.168862000  | 3.521425000  | -4.677223000 |
| C | -0.270221000 | 4.748083000  | -4.263697000 |
| S | -0.516381000 | 4.803452000  | -2.567738000 |
| H | 0.468653000  | -5.623819000 | -4.866353000 |
| H | -0.387783000 | -3.282009000 | -5.710488000 |
| H | -0.662980000 | -1.587125000 | -3.730498000 |
| H | 0.662980000  | 1.587125000  | -3.730498000 |
| H | 0.387783000  | 3.282009000  | -5.710488000 |
| H | -0.468653000 | 5.623819000  | -4.866353000 |
| C | 0.569338000  | -3.974483000 | 3.075717000  |
| C | 0.541256000  | -4.338590000 | 4.416690000  |
| H | 1.286204000  | 1.750494000  | 5.636469000  |
| H | 1.235828000  | 1.104025000  | 3.255150000  |
| H | 1.104683000  | -4.592956000 | 2.362485000  |
| H | 1.044392000  | -5.244741000 | 4.738681000  |

## A2 GS CAM-B3LYP/6-31+G(d,p)

|   |              |              |              |
|---|--------------|--------------|--------------|
| N | -0.847570000 | -1.067989000 | -0.094364000 |
| C | -1.203391000 | 0.280105000  | -0.111842000 |
| C | -2.633211000 | 0.382914000  | -0.153294000 |
| C | -3.103383000 | -0.917722000 | -0.121841000 |
| C | -1.995516000 | -1.794585000 | -0.088782000 |
| N | 1.502292000  | -0.259192000 | 0.044416000  |
| C | 0.950120000  | 1.018429000  | 0.039387000  |
| C | 2.002944000  | 1.985030000  | 0.079828000  |
| C | 3.181093000  | 1.255199000  | 0.082122000  |
| C | 2.855546000  | -0.117613000 | 0.059504000  |
| B | 0.628811000  | -1.535461000 | -0.020138000 |
| N | -0.340289000 | 1.269576000  | -0.039865000 |
| F | 0.974891000  | -2.278810000 | -1.158792000 |
| F | 0.806139000  | -2.323629000 | 1.126971000  |
| H | -4.136311000 | -1.231512000 | -0.165905000 |
| H | 4.184617000  | 1.649941000  | 0.138542000  |
| C | 1.878691000  | 3.426963000  | 0.112038000  |
| S | 0.395276000  | 4.255669000  | 0.490352000  |
| C | 2.891484000  | 4.332915000  | -0.109056000 |
| C | 1.154874000  | 5.791597000  | 0.350123000  |
| C | 2.477627000  | 5.683997000  | 0.023893000  |
| H | 3.900132000  | 4.036933000  | -0.371027000 |
| H | 0.579777000  | 6.693415000  | 0.510336000  |
| H | 3.132291000  | 6.534839000  | -0.119137000 |
| C | -3.410265000 | 1.601484000  | -0.222261000 |
| S | -5.109777000 | 1.590741000  | 0.162461000  |
| C | -3.009377000 | 2.860985000  | -0.600974000 |

|   |              |              |              |
|---|--------------|--------------|--------------|
| C | -5.255702000 | 3.267895000  | -0.187709000 |
| C | -4.065483000 | 3.811923000  | -0.579733000 |
| H | -1.991645000 | 3.086965000  | -0.887606000 |
| H | -6.212160000 | 3.760658000  | -0.079987000 |
| H | -3.945195000 | 4.854483000  | -0.847748000 |
| C | -2.098843000 | -3.237942000 | -0.054841000 |
| S | -3.622425000 | -3.954753000 | 0.411512000  |
| C | -1.183448000 | -4.219406000 | -0.363495000 |
| C | -3.009690000 | -5.539917000 | 0.185265000  |
| C | -1.706396000 | -5.530905000 | -0.227088000 |
| H | -0.179029000 | -4.005059000 | -0.697026000 |
| H | -3.643498000 | -6.395303000 | 0.375169000  |
| H | -1.137444000 | -6.429746000 | -0.430096000 |
| C | 3.829656000  | -1.189534000 | 0.052317000  |
| S | 5.477844000  | -0.816848000 | -0.391392000 |
| C | 3.711179000  | -2.523300000 | 0.372398000  |
| C | 5.972235000  | -2.439711000 | -0.139560000 |
| C | 4.935014000  | -3.233179000 | 0.263311000  |
| H | 2.783585000  | -2.972110000 | 0.695188000  |
| H | 7.002231000  | -2.722294000 | -0.308927000 |
| H | 5.039066000  | -4.289415000 | 0.478813000  |

48

A3 GS CAM-B3LYP/6-31+G(d,p)

|   |              |              |              |
|---|--------------|--------------|--------------|
| N | 0.028888000  | 1.244725000  | -0.455156000 |
| C | 0.043277000  | 1.138761000  | 0.933870000  |
| C | 0.049391000  | 2.453996000  | 1.494861000  |
| C | 0.000000000  | 3.329517000  | 0.425143000  |
| C | -0.008072000 | 2.568865000  | -0.765607000 |
| N | -0.028888000 | -1.244725000 | -0.455156000 |

|   |              |              |              |
|---|--------------|--------------|--------------|
| C | -0.043277000 | -1.138761000 | 0.933870000  |
| C | -0.049391000 | -2.453996000 | 1.494861000  |
| C | 0.000000000  | -3.329517000 | 0.425143000  |
| C | 0.008072000  | -2.568865000 | -0.765607000 |
| B | 0.000000000  | 0.000000000  | -1.377577000 |
| N | 0.000000000  | 0.000000000  | 1.592666000  |
| F | 1.145262000  | -0.047943000 | -2.186445000 |
| F | -1.145262000 | 0.047943000  | -2.186445000 |
| H | 0.006162000  | 4.407739000  | 0.479249000  |
| H | -0.006162000 | -4.407739000 | 0.479249000  |
| C | -0.111260000 | -2.791749000 | 2.890419000  |
| O | 0.077786000  | -4.109733000 | 3.204011000  |
| C | -0.357420000 | -2.083986000 | 4.034500000  |
| C | -0.043471000 | -4.228076000 | 4.548217000  |
| C | -0.310484000 | -3.018922000 | 5.109819000  |
| H | -0.562806000 | -1.026581000 | 4.086287000  |
| H | 0.086113000  | -5.220990000 | 4.949939000  |
| H | -0.459689000 | -2.818233000 | 6.160484000  |
| C | 0.111260000  | 2.791749000  | 2.890419000  |
| O | -0.077786000 | 4.109733000  | 3.204011000  |
| C | 0.357420000  | 2.083986000  | 4.034500000  |
| C | 0.043471000  | 4.228076000  | 4.548217000  |
| C | 0.310484000  | 3.018922000  | 5.109819000  |
| H | 0.562806000  | 1.026581000  | 4.086287000  |
| H | -0.086113000 | 5.220990000  | 4.949939000  |
| H | 0.459689000  | 2.818233000  | 6.160484000  |
| C | -0.052419000 | 3.137017000  | -2.096472000 |
| C | 0.263627000  | 2.597444000  | -3.323418000 |
| C | 0.110908000  | 3.517445000  | -4.392435000 |

|   |              |              |              |
|---|--------------|--------------|--------------|
| C | -0.320842000 | 4.745390000  | -3.975200000 |
| S | -0.546172000 | 4.803369000  | -2.276397000 |
| H | 0.613635000  | 1.583804000  | -3.449688000 |
| H | 0.316546000  | 3.276086000  | -5.427971000 |
| H | -0.525511000 | 5.620618000  | -4.576503000 |
| C | 0.052419000  | -3.137017000 | -2.096472000 |
| C | -0.263627000 | -2.597444000 | -3.323418000 |
| C | -0.110908000 | -3.517445000 | -4.392435000 |
| C | 0.320842000  | -4.745390000 | -3.975200000 |
| S | 0.546172000  | -4.803369000 | -2.276397000 |
| H | -0.613635000 | -1.583804000 | -3.449688000 |
| H | -0.316546000 | -3.276086000 | -5.427971000 |
| H | 0.525511000  | -5.620618000 | -4.576503000 |

52

A4 GS CAM-B3LYP/6-31+G(d,p)

|   |              |              |              |
|---|--------------|--------------|--------------|
| N | 0.040939000  | 1.246371000  | -0.739270000 |
| C | 0.046425000  | 1.140538000  | 0.650003000  |
| C | 0.037498000  | 2.452193000  | 1.219024000  |
| C | 0.000000000  | 3.325208000  | 0.151611000  |
| C | 0.006508000  | 2.567786000  | -1.047515000 |
| N | -0.040939000 | -1.246371000 | -0.739270000 |
| C | -0.046425000 | -1.140538000 | 0.650003000  |
| C | -0.037498000 | -2.452193000 | 1.219024000  |
| C | 0.000000000  | -3.325208000 | 0.151611000  |
| C | -0.006508000 | -2.567786000 | -1.047515000 |
| B | 0.000000000  | 0.000000000  | -1.662844000 |
| N | 0.000000000  | 0.000000000  | 1.304710000  |
| F | 1.144933000  | -0.061118000 | -2.468644000 |
| F | -1.144933000 | 0.061118000  | -2.468644000 |

|   |              |              |              |
|---|--------------|--------------|--------------|
| H | 0.019354000  | 4.404358000  | 0.197965000  |
| H | -0.019354000 | -4.404358000 | 0.197965000  |
| C | -0.050686000 | -2.786321000 | 2.644791000  |
| C | 0.588325000  | -3.948677000 | 3.095930000  |
| C | -0.695465000 | -1.995572000 | 3.601673000  |
| N | 0.608642000  | -4.341884000 | 4.368386000  |
| C | -0.675450000 | -2.395625000 | 4.930357000  |
| C | -0.017178000 | -3.573942000 | 5.266370000  |
| H | -1.207787000 | -1.088908000 | 3.303596000  |
| H | -1.169787000 | -1.809185000 | 5.696787000  |
| H | 0.009028000  | -3.917403000 | 6.296945000  |
| H | 1.122136000  | -4.580431000 | 2.390571000  |
| C | 0.050686000  | 2.786321000  | 2.644791000  |
| C | -0.588325000 | 3.948677000  | 3.095930000  |
| C | 0.695465000  | 1.995572000  | 3.601673000  |
| N | -0.608642000 | 4.341884000  | 4.368386000  |
| C | 0.675450000  | 2.395625000  | 4.930357000  |
| C | 0.017178000  | 3.573942000  | 5.266370000  |
| H | -1.122136000 | 4.580431000  | 2.390571000  |
| H | 1.207787000  | 1.088908000  | 3.303596000  |
| H | 1.169787000  | 1.809185000  | 5.696787000  |
| H | -0.009028000 | 3.917403000  | 6.296945000  |
| C | 0.017494000  | -3.140883000 | -2.375147000 |
| C | -0.302796000 | -2.599916000 | -3.601116000 |
| C | -0.169751000 | -3.523506000 | -4.668727000 |
| C | 0.251281000  | -4.755723000 | -4.251901000 |
| S | 0.489759000  | -4.813539000 | -2.555640000 |
| H | -0.642250000 | -1.582609000 | -3.726958000 |
| H | -0.381245000 | -3.282410000 | -5.703091000 |

|   |              |              |              |
|---|--------------|--------------|--------------|
| H | 0.440375000  | -5.634551000 | -4.853081000 |
| C | -0.017494000 | 3.140883000  | -2.375147000 |
| C | 0.302796000  | 2.599916000  | -3.601116000 |
| C | 0.169751000  | 3.523506000  | -4.668727000 |
| C | -0.251281000 | 4.755723000  | -4.251901000 |
| S | -0.489759000 | 4.813539000  | -2.555640000 |
| H | 0.642250000  | 1.582609000  | -3.726958000 |
| H | 0.381245000  | 3.282410000  | -5.703091000 |
| H | -0.440375000 | 5.634551000  | -4.853081000 |

52

A5 GS CAM-B3LYP/6-31+G(d,p)

|   |              |              |              |
|---|--------------|--------------|--------------|
| N | 0.043511000  | 1.246820000  | -0.742045000 |
| C | 0.046037000  | 1.140824000  | 0.646842000  |
| C | 0.033807000  | 2.453288000  | 1.213936000  |
| C | 0.000000000  | 3.325356000  | 0.147558000  |
| C | 0.011652000  | 2.567433000  | -1.052442000 |
| N | -0.043511000 | -1.246820000 | -0.742045000 |
| C | -0.046037000 | -1.140824000 | 0.646842000  |
| C | -0.033807000 | -2.453288000 | 1.213936000  |
| C | 0.000000000  | -3.325356000 | 0.147558000  |
| C | -0.011652000 | -2.567433000 | -1.052442000 |
| B | 0.000000000  | 0.000000000  | -1.665997000 |
| N | 0.000000000  | 0.000000000  | 1.300850000  |
| F | 1.144911000  | -0.063442000 | -2.470181000 |
| F | -1.144911000 | 0.063442000  | -2.470181000 |
| H | 0.016183000  | 4.404547000  | 0.194725000  |
| H | -0.016183000 | -4.404547000 | 0.194725000  |
| C | -0.046382000 | -2.798229000 | 2.639851000  |
| C | 0.564740000  | -3.973770000 | 3.088173000  |



|   |              |              |              |
|---|--------------|--------------|--------------|
| C | -0.676232000 | -1.997619000 | 3.597605000  |
| C | 0.518829000  | -4.289181000 | 4.439626000  |
| C | -0.665461000 | -2.402994000 | 4.926749000  |
| N | -0.083056000 | -3.526099000 | 5.357505000  |
| H | -1.171182000 | -1.077668000 | 3.314810000  |
| H | 0.991952000  | -5.198016000 | 4.801751000  |
| H | -1.153550000 | -1.792940000 | 5.682187000  |
| H | 1.085880000  | -4.630070000 | 2.400221000  |
| C | 0.046382000  | 2.798229000  | 2.639851000  |
| C | -0.564740000 | 3.973770000  | 3.088173000  |
| C | 0.676232000  | 1.997619000  | 3.597605000  |
| C | -0.518829000 | 4.289181000  | 4.439626000  |
| C | 0.665461000  | 2.402994000  | 4.926749000  |
| N | 0.083056000  | 3.526099000  | 5.357505000  |
| H | -1.085880000 | 4.630070000  | 2.400221000  |
| H | 1.171182000  | 1.077668000  | 3.314810000  |
| H | -0.991952000 | 5.198016000  | 4.801751000  |
| H | 1.153550000  | 1.792940000  | 5.682187000  |
| C | 0.007403000  | -3.140403000 | -2.379435000 |
| C | -0.306291000 | -2.595985000 | -3.605980000 |
| C | -0.180903000 | -3.520325000 | -4.673335000 |
| C | 0.227671000  | -4.756785000 | -4.256059000 |
| S | 0.463361000  | -4.817764000 | -2.559949000 |
| H | -0.635925000 | -1.575592000 | -3.732451000 |
| H | -0.388821000 | -3.277095000 | -5.707889000 |
| H | 0.408824000  | -5.637268000 | -4.857279000 |
| C | -0.007403000 | 3.140403000  | -2.379435000 |
| C | 0.306291000  | 2.595985000  | -3.605980000 |
| C | 0.180903000  | 3.520325000  | -4.673335000 |

|   |              |             |              |
|---|--------------|-------------|--------------|
| C | -0.227671000 | 4.756785000 | -4.256059000 |
| S | -0.463361000 | 4.817764000 | -2.559949000 |
| H | 0.635925000  | 1.575592000 | -3.732451000 |
| H | 0.388821000  | 3.277095000 | -5.707889000 |
| H | -0.408824000 | 5.637268000 | -4.857279000 |

52

A6 GS CAM-B3LYP/6-31+G(d,p)

|   |              |              |              |
|---|--------------|--------------|--------------|
| N | 0.040226000  | 1.246077000  | -0.721705000 |
| C | 0.048366000  | 1.143066000  | 0.668143000  |
| C | 0.043718000  | 2.459273000  | 1.230200000  |
| C | 0.000000000  | 3.327185000  | 0.161338000  |
| C | 0.005394000  | 2.567071000  | -1.034778000 |
| N | -0.040226000 | -1.246077000 | -0.721705000 |
| C | -0.048366000 | -1.143066000 | 0.668143000  |
| C | -0.043718000 | -2.459273000 | 1.230200000  |
| C | 0.000000000  | -3.327185000 | 0.161338000  |
| C | -0.005394000 | -2.567071000 | -1.034778000 |
| B | 0.000000000  | 0.000000000  | -1.643468000 |
| N | 0.000000000  | 0.000000000  | 1.319356000  |
| F | 1.145069000  | -0.058567000 | -2.450192000 |
| F | -1.145069000 | 0.058567000  | -2.450192000 |
| H | -0.002524000 | 4.404787000  | 0.221497000  |
| H | 0.002524000  | -4.404787000 | 0.221497000  |
| C | -0.079788000 | -2.845502000 | 2.648515000  |
| N | 0.305407000  | -4.105671000 | 2.914902000  |
| C | -0.518199000 | -1.975524000 | 3.651529000  |
| C | 0.274539000  | -4.523506000 | 4.178276000  |
| C | -0.543860000 | -2.425516000 | 4.965976000  |
| C | -0.138320000 | -3.724826000 | 5.242572000  |

|   |              |              |              |
|---|--------------|--------------|--------------|
| H | -0.833211000 | -0.972369000 | 3.397297000  |
| H | 0.595854000  | -5.547293000 | 4.352417000  |
| H | -0.882026000 | -1.768725000 | 5.760858000  |
| H | -0.142475000 | -4.118423000 | 6.252789000  |
| C | 0.079788000  | 2.845502000  | 2.648515000  |
| N | -0.305407000 | 4.105671000  | 2.914902000  |
| C | 0.518199000  | 1.975524000  | 3.651529000  |
| C | -0.274539000 | 4.523506000  | 4.178276000  |
| C | 0.543860000  | 2.425516000  | 4.965976000  |
| C | 0.138320000  | 3.724826000  | 5.242572000  |
| H | 0.833211000  | 0.972369000  | 3.397297000  |
| H | -0.595854000 | 5.547293000  | 4.352417000  |
| H | 0.882026000  | 1.768725000  | 5.760858000  |
| H | 0.142475000  | 4.118423000  | 6.252789000  |
| C | -0.023210000 | 3.136876000  | -2.363575000 |
| C | 0.279279000  | 2.590823000  | -3.592021000 |
| C | 0.147413000  | 3.514477000  | -4.659569000 |
| C | -0.254986000 | 4.752236000  | -4.240427000 |
| S | -0.476525000 | 4.815235000  | -2.542189000 |
| H | 0.605237000  | 1.569492000  | -3.720019000 |
| H | 0.346423000  | 3.269480000  | -5.695506000 |
| H | -0.438802000 | 5.632524000  | -4.841118000 |
| C | 0.023210000  | -3.136876000 | -2.363575000 |
| C | -0.279279000 | -2.590823000 | -3.592021000 |
| C | -0.147413000 | -3.514477000 | -4.659569000 |
| C | 0.254986000  | -4.752236000 | -4.240427000 |
| S | 0.476525000  | -4.815235000 | -2.542189000 |
| H | -0.605237000 | -1.569492000 | -3.720019000 |
| H | -0.346423000 | -3.269480000 | -5.695506000 |

|                             |              |              |              |
|-----------------------------|--------------|--------------|--------------|
| H                           | 0.438802000  | -5.632524000 | -4.841118000 |
| 34                          |              |              |              |
| A7 GS CAM-B3LYP/6-31+G(d,p) |              |              |              |
| N                           | 0.034541000  | 1.247174000  | 1.049691000  |
| C                           | 0.018424000  | 1.140437000  | 2.441928000  |
| C                           | -0.002344000 | 2.443245000  | 3.000532000  |
| C                           | -0.011954000 | 3.325652000  | 1.952561000  |
| C                           | 0.010442000  | 2.568377000  | 0.743774000  |
| N                           | -0.034541000 | -1.247174000 | 1.049691000  |
| C                           | -0.018424000 | -1.140437000 | 2.441928000  |
| C                           | 0.002344000  | -2.443245000 | 3.000532000  |
| C                           | 0.011954000  | -3.325652000 | 1.952561000  |
| C                           | -0.010442000 | -2.568377000 | 0.743774000  |
| B                           | 0.000000000  | 0.000000000  | 0.126016000  |
| N                           | 0.000000000  | 0.000000000  | 3.101882000  |
| F                           | 1.145357000  | -0.055143000 | -0.679826000 |
| F                           | -1.145357000 | 0.055143000  | -0.679826000 |
| H                           | -0.015787000 | 4.404520000  | 2.007330000  |
| C                           | 0.000000000  | 3.146213000  | -0.581380000 |
| C                           | 0.000000000  | -3.146213000 | -0.581380000 |
| H                           | 0.015787000  | -4.404520000 | 2.007330000  |
| S                           | 0.415512000  | -4.835472000 | -0.754030000 |
| C                           | 0.192291000  | -4.774997000 | -2.452117000 |
| C                           | -0.182808000 | -3.530364000 | -2.875902000 |
| C                           | -0.292399000 | -2.599453000 | -1.812248000 |
| C                           | 0.292399000  | 2.599453000  | -1.812248000 |
| C                           | 0.182808000  | 3.530364000  | -2.875902000 |
| C                           | -0.192291000 | 4.774997000  | -2.452117000 |
| S                           | -0.415512000 | 4.835472000  | -0.754030000 |

|   |              |              |              |
|---|--------------|--------------|--------------|
| H | 0.354965000  | -5.661952000 | -3.049085000 |
| H | -0.377838000 | -3.285367000 | -3.912584000 |
| H | -0.595686000 | -1.571833000 | -1.944955000 |
| H | 0.595686000  | 1.571833000  | -1.944955000 |
| H | 0.377838000  | 3.285367000  | -3.912584000 |
| H | -0.354965000 | 5.661952000  | -3.049085000 |
| H | -0.008656000 | 2.656264000  | 4.059853000  |
| H | 0.008656000  | -2.656264000 | 4.059853000  |

52

B1 GS CAM-B3LYP/6-31+G(d,p)

|   |              |              |              |
|---|--------------|--------------|--------------|
| N | -0.016703000 | 1.230185000  | -1.670809000 |
| C | 0.011636000  | 1.140592000  | -0.277960000 |
| C | 0.000000000  | 2.466907000  | 0.261841000  |
| C | -0.049552000 | 3.318717000  | -0.833405000 |
| C | -0.053814000 | 2.533881000  | -2.004752000 |
| N | 0.016703000  | -1.230185000 | -1.670809000 |
| C | -0.011636000 | -1.140592000 | -0.277960000 |
| C | 0.000000000  | -2.466907000 | 0.261841000  |
| C | 0.049552000  | -3.318717000 | -0.833405000 |
| C | 0.053814000  | -2.533881000 | -2.004752000 |
| B | 0.000000000  | 0.000000000  | -2.605023000 |
| N | 0.000000000  | 0.000000000  | 0.380834000  |
| F | 1.141465000  | 0.015646000  | -3.422489000 |
| F | -1.141465000 | -0.015646000 | -3.422489000 |
| C | 0.023886000  | 2.846612000  | 1.677763000  |
| H | -0.051269000 | 4.398145000  | -0.812848000 |
| H | 0.051269000  | -4.398145000 | -0.812848000 |
| C | -0.023886000 | -2.846612000 | 1.677763000  |
| C | 0.700382000  | 2.455534000  | 3.973177000  |

|   |              |              |              |
|---|--------------|--------------|--------------|
| C | 0.674364000  | 2.060552000  | 2.639855000  |
| C | -0.568609000 | 4.427857000  | 3.421462000  |
| C | -0.700382000 | -2.455534000 | 3.973177000  |
| C | 0.079775000  | 3.638176000  | 4.369640000  |
| C | -0.595733000 | 4.036312000  | 2.088347000  |
| C | -0.674364000 | -2.060552000 | 2.639855000  |
| C | -0.079775000 | -3.638176000 | 4.369640000  |
| H | 0.101765000  | 3.943692000  | 5.410897000  |
| H | -1.165879000 | -1.144205000 | 2.336989000  |
| H | -0.101765000 | -3.943692000 | 5.410897000  |
| H | -1.059144000 | 5.348270000  | 3.721812000  |
| H | -1.213046000 | -1.838611000 | 4.704467000  |
| H | -1.117782000 | 4.648042000  | 1.359730000  |
| C | 0.595733000  | -4.036312000 | 2.088347000  |
| C | 0.568609000  | -4.427857000 | 3.421462000  |
| H | 1.213046000  | 1.838611000  | 4.704467000  |
| H | 1.165879000  | 1.144205000  | 2.336989000  |
| H | 1.117782000  | -4.648042000 | 1.359730000  |
| H | 1.059144000  | -5.348270000 | 3.721812000  |
| C | 0.081703000  | -2.991976000 | -3.426802000 |
| H | -0.789421000 | -2.567905000 | -3.938758000 |
| H | 0.953637000  | -2.539595000 | -3.912404000 |
| C | 0.109428000  | -4.507909000 | -3.596589000 |
| H | -0.776309000 | -4.977691000 | -3.159715000 |
| H | 0.994658000  | -4.948345000 | -3.129160000 |
| H | 0.131957000  | -4.761990000 | -4.658778000 |
| C | -0.081703000 | 2.991976000  | -3.426802000 |
| H | 0.789421000  | 2.567905000  | -3.938758000 |
| H | -0.953637000 | 2.539595000  | -3.912404000 |

|   |              |             |              |
|---|--------------|-------------|--------------|
| C | -0.109428000 | 4.507909000 | -3.596589000 |
| H | 0.776309000  | 4.977691000 | -3.159715000 |
| H | -0.994658000 | 4.948345000 | -3.129160000 |
| H | -0.131957000 | 4.761990000 | -4.658778000 |

46

B2 GS CAM-B3LYP/6-31+G(d,p)

|   |              |              |              |
|---|--------------|--------------|--------------|
| N | -1.569374000 | -1.429183000 | 0.023965000  |
| C | -1.279024000 | -0.066963000 | 0.012903000  |
| C | -2.511494000 | 0.659803000  | 0.001282000  |
| C | -3.518754000 | -0.303467000 | 0.015556000  |
| C | -2.912086000 | -1.570148000 | 0.028185000  |
| N | 0.862638000  | -1.780209000 | 0.006532000  |
| C | 0.975374000  | -0.389623000 | 0.041666000  |
| C | 2.370391000  | -0.052563000 | 0.055937000  |
| C | 3.053051000  | -1.263767000 | 0.009443000  |
| C | 2.104877000  | -2.302414000 | -0.017022000 |
| B | -0.488601000 | -2.529173000 | 0.010293000  |
| N | -0.057003000 | 0.426922000  | 0.031219000  |
| F | -0.611139000 | -3.332739000 | -1.135195000 |
| F | -0.597050000 | -3.347254000 | 1.147060000  |
| H | -4.583346000 | -0.126937000 | 0.000517000  |
| H | 4.123878000  | -1.402914000 | 0.014916000  |
| C | 2.937637000  | 1.276274000  | 0.113575000  |
| S | 4.623933000  | 1.535034000  | -0.243769000 |
| C | 2.330923000  | 2.462286000  | 0.456685000  |
| C | 4.488789000  | 3.220402000  | 0.068552000  |
| C | 3.218540000  | 3.571559000  | 0.429112000  |
| H | 1.284860000  | 2.525296000  | 0.723065000  |
| H | 5.354388000  | 3.860116000  | -0.035273000 |

|   |              |              |              |
|---|--------------|--------------|--------------|
| H | 2.925562000  | 4.585994000  | 0.670664000  |
| C | -2.688842000 | 2.095501000  | -0.018245000 |
| S | -1.399627000 | 3.219914000  | -0.344930000 |
| C | -3.871667000 | 2.770399000  | 0.186878000  |
| C | -2.462474000 | 4.563952000  | -0.202464000 |
| C | -3.742250000 | 4.179965000  | 0.084374000  |
| H | -4.803981000 | 2.268398000  | 0.415402000  |
| H | -2.082412000 | 5.567787000  | -0.334931000 |
| H | -4.561876000 | 4.874860000  | 0.219706000  |
| C | 2.348032000  | -3.775949000 | -0.056351000 |
| H | 1.834657000  | -4.228481000 | 0.799348000  |
| H | 1.846050000  | -4.178614000 | -0.943252000 |
| C | 3.822209000  | -4.168541000 | -0.058464000 |
| H | 4.333799000  | -3.814406000 | 0.840947000  |
| H | 4.344585000  | -3.763991000 | -0.929966000 |
| H | 3.916144000  | -5.256413000 | -0.088993000 |
| C | -3.568511000 | -2.912534000 | 0.036030000  |
| H | -3.202490000 | -3.475728000 | -0.829727000 |
| H | -3.209233000 | -3.461412000 | 0.913802000  |
| C | -5.093313000 | -2.864910000 | 0.030130000  |
| H | -5.476155000 | -2.360786000 | -0.861730000 |
| H | -5.482468000 | -2.344268000 | 0.909687000  |
| H | -5.496425000 | -3.880158000 | 0.038154000  |

46

B3 GS CAM-B3LYP/6-31+G(d,p)

|   |              |             |              |
|---|--------------|-------------|--------------|
| N | -0.007749000 | 1.229041000 | -1.361053000 |
| C | 0.017703000  | 1.137616000 | 0.030237000  |
| C | 0.035040000  | 2.466519000 | 0.561356000  |
| C | 0.000000000  | 3.324074000 | -0.533245000 |



|   |              |              |              |
|---|--------------|--------------|--------------|
| C | -0.021754000 | 2.535835000  | -1.697693000 |
| N | 0.007749000  | -1.229041000 | -1.361053000 |
| C | -0.017703000 | -1.137616000 | 0.030237000  |
| C | -0.035040000 | -2.466519000 | 0.561356000  |
| C | 0.000000000  | -3.324074000 | -0.533245000 |
| C | 0.021754000  | -2.535835000 | -1.697693000 |
| B | 0.000000000  | 0.000000000  | -2.295470000 |
| N | 0.000000000  | 0.000000000  | 0.694939000  |
| F | 1.141237000  | 0.007788000  | -3.113915000 |
| F | -1.141237000 | -0.007788000 | -3.113915000 |
| H | 0.002000000  | 4.402576000  | -0.503833000 |
| H | -0.002000000 | -4.402576000 | -0.503833000 |
| C | -0.090085000 | -2.836144000 | 1.948152000  |
| O | 0.051873000  | -4.168005000 | 2.227979000  |
| C | -0.286179000 | -2.147569000 | 3.114143000  |
| C | -0.049233000 | -4.313835000 | 3.570805000  |
| C | -0.256988000 | -3.108864000 | 4.165972000  |
| H | -0.446149000 | -1.084270000 | 3.195024000  |
| H | 0.047294000  | -5.320531000 | 3.946766000  |
| H | -0.378415000 | -2.927957000 | 5.223784000  |
| C | 0.090085000  | 2.836144000  | 1.948152000  |
| O | -0.051873000 | 4.168005000  | 2.227979000  |
| C | 0.286179000  | 2.147569000  | 3.114143000  |
| C | 0.049233000  | 4.313835000  | 3.570805000  |
| C | 0.256988000  | 3.108864000  | 4.165972000  |
| H | 0.446149000  | 1.084270000  | 3.195024000  |
| H | -0.047294000 | 5.320531000  | 3.946766000  |
| H | 0.378415000  | 2.927957000  | 5.223784000  |
| C | -0.051513000 | 2.989149000  | -3.121074000 |

|   |              |              |              |
|---|--------------|--------------|--------------|
| H | 0.804216000  | 2.541926000  | -3.639106000 |
| H | -0.938783000 | 2.556668000  | -3.597043000 |
| C | -0.043581000 | 4.504711000  | -3.295688000 |
| H | 0.856348000  | 4.953869000  | -2.866209000 |
| H | -0.914455000 | 4.968036000  | -2.823494000 |
| H | -0.067378000 | 4.755923000  | -4.358526000 |
| C | 0.051513000  | -2.989149000 | -3.121074000 |
| H | -0.804216000 | -2.541926000 | -3.639106000 |
| H | 0.938783000  | -2.556668000 | -3.597043000 |
| C | 0.043581000  | -4.504711000 | -3.295688000 |
| H | -0.856348000 | -4.953869000 | -2.866209000 |
| H | 0.914455000  | -4.968036000 | -2.823494000 |
| H | 0.067378000  | -4.755923000 | -4.358526000 |

50

B4 GS CAM-B3LYP/6-31+G(d,p)

|   |              |              |              |
|---|--------------|--------------|--------------|
| N | 0.015003000  | 1.231198000  | -1.662112000 |
| C | -0.009708000 | 1.139689000  | -0.270541000 |
| C | 0.000000000  | 2.464622000  | 0.269778000  |
| C | 0.042326000  | 3.319521000  | -0.821445000 |
| C | 0.046761000  | 2.534628000  | -1.995034000 |
| N | -0.015003000 | -1.231198000 | -1.662112000 |
| C | 0.009708000  | -1.139689000 | -0.270541000 |
| C | 0.000000000  | -2.464622000 | 0.269778000  |
| C | -0.042326000 | -3.319521000 | -0.821445000 |
| C | -0.046761000 | -2.534628000 | -1.995034000 |
| B | 0.000000000  | 0.000000000  | -2.598420000 |
| N | 0.000000000  | 0.000000000  | 0.389477000  |
| F | 1.141653000  | -0.013803000 | -3.412462000 |
| F | -1.141653000 | 0.013803000  | -3.412462000 |

|   |              |              |              |
|---|--------------|--------------|--------------|
| H | 0.039380000  | 4.398929000  | -0.800481000 |
| H | -0.039380000 | -4.398929000 | -0.800481000 |
| C | 0.015777000  | -2.829969000 | 1.687274000  |
| C | -0.606160000 | -4.012025000 | 2.111740000  |
| C | 0.644974000  | -2.050505000 | 2.664199000  |
| N | -0.624874000 | -4.432689000 | 3.375300000  |
| C | 0.626181000  | -2.479095000 | 3.983970000  |
| C | -0.014581000 | -3.674495000 | 4.292197000  |
| H | 1.145227000  | -1.130398000 | 2.387573000  |
| H | 1.108739000  | -1.901762000 | 4.764707000  |
| H | -0.038835000 | -4.040600000 | 5.314989000  |
| H | -1.127395000 | -4.636845000 | 1.391097000  |
| C | -0.015777000 | 2.829969000  | 1.687274000  |
| C | 0.606160000  | 4.012025000  | 2.111740000  |
| C | -0.644974000 | 2.050505000  | 2.664199000  |
| N | 0.624874000  | 4.432689000  | 3.375300000  |
| C | -0.626181000 | 2.479095000  | 3.983970000  |
| C | 0.014581000  | 3.674495000  | 4.292197000  |
| H | 1.127395000  | 4.636845000  | 1.391097000  |
| H | -1.145227000 | 1.130398000  | 2.387573000  |
| H | -1.108739000 | 1.901762000  | 4.764707000  |
| H | 0.038835000  | 4.040600000  | 5.314989000  |
| C | -0.071237000 | -2.994849000 | -3.416014000 |
| H | -0.946923000 | -2.549460000 | -3.901444000 |
| H | 0.796454000  | -2.564283000 | -3.928320000 |
| C | -0.087455000 | -4.511148000 | -3.583862000 |
| H | -0.969708000 | -4.957790000 | -3.116797000 |
| H | 0.801733000  | -4.973691000 | -3.146358000 |
| H | -0.107513000 | -4.766091000 | -4.645811000 |

|   |              |             |              |
|---|--------------|-------------|--------------|
| C | 0.071237000  | 2.994849000 | -3.416014000 |
| H | 0.946923000  | 2.549460000 | -3.901444000 |
| H | -0.796454000 | 2.564283000 | -3.928320000 |
| C | 0.087455000  | 4.511148000 | -3.583862000 |
| H | 0.969708000  | 4.957790000 | -3.116797000 |
| H | -0.801733000 | 4.973691000 | -3.146358000 |
| H | 0.107513000  | 4.766091000 | -4.645811000 |

50

B5 GS CAM-B3LYP/6-31+G(d,p)

|   |              |              |              |
|---|--------------|--------------|--------------|
| N | 0.011568000  | 1.231898000  | -1.666230000 |
| C | -0.010684000 | 1.140047000  | -0.275029000 |
| C | 0.000000000  | 2.465735000  | 0.263555000  |
| C | 0.037808000  | 3.319728000  | -0.826416000 |
| C | 0.039086000  | 2.534174000  | -2.000976000 |
| N | -0.011568000 | -1.231898000 | -1.666230000 |
| C | 0.010684000  | -1.140047000 | -0.275029000 |
| C | 0.000000000  | -2.465735000 | 0.263555000  |
| C | -0.037808000 | -3.319728000 | -0.826416000 |
| C | -0.039086000 | -2.534174000 | -2.000976000 |
| B | 0.000000000  | 0.000000000  | -2.603476000 |
| N | 0.000000000  | 0.000000000  | 0.384014000  |
| F | 1.141875000  | -0.011255000 | -3.415125000 |
| F | -1.141875000 | 0.011255000  | -3.415125000 |
| H | 0.036031000  | 4.399124000  | -0.804903000 |
| H | -0.036031000 | -4.399124000 | -0.804903000 |
| C | 0.016690000  | -2.841281000 | 1.681096000  |
| C | -0.576920000 | -4.035584000 | 2.103855000  |
| C | 0.632436000  | -2.051961000 | 2.657847000  |
| C | -0.529518000 | -4.378341000 | 3.448436000  |

|   |              |              |              |
|---|--------------|--------------|--------------|
| C | 0.624368000  | -2.484999000 | 3.978208000  |
| N | 0.058237000  | -3.625579000 | 4.383992000  |
| H | 1.115576000  | -1.119674000 | 2.395700000  |
| H | -0.989271000 | -5.301844000 | 3.790140000  |
| H | 1.101452000  | -1.883578000 | 4.747502000  |
| H | -1.085827000 | -4.685515000 | 1.400947000  |
| C | -0.016690000 | 2.841281000  | 1.681096000  |
| C | 0.576920000  | 4.035584000  | 2.103855000  |
| C | -0.632436000 | 2.051961000  | 2.657847000  |
| C | 0.529518000  | 4.378341000  | 3.448436000  |
| C | -0.624368000 | 2.484999000  | 3.978208000  |
| N | -0.058237000 | 3.625579000  | 4.383992000  |
| H | 1.085827000  | 4.685515000  | 1.400947000  |
| H | -1.115576000 | 1.119674000  | 2.395700000  |
| H | 0.989271000  | 5.301844000  | 3.790140000  |
| H | -1.101452000 | 1.883578000  | 4.747502000  |
| C | 0.058309000  | 2.994121000  | -3.421880000 |
| H | 0.927658000  | 2.542376000  | -3.912652000 |
| H | -0.815799000 | 2.569589000  | -3.928398000 |
| C | 0.083754000  | 4.510299000  | -3.589586000 |
| H | 0.971685000  | 4.950904000  | -3.127589000 |
| H | -0.799941000 | 4.978788000  | -3.147352000 |
| H | 0.099552000  | 4.764952000  | -4.651629000 |
| C | -0.058309000 | -2.994121000 | -3.421880000 |
| H | -0.927658000 | -2.542376000 | -3.912652000 |
| H | 0.815799000  | -2.569589000 | -3.928398000 |
| C | -0.083754000 | -4.510299000 | -3.589586000 |
| H | -0.971685000 | -4.950904000 | -3.127589000 |
| H | 0.799941000  | -4.978788000 | -3.147352000 |

|                             |              |              |              |
|-----------------------------|--------------|--------------|--------------|
| H                           | -0.099552000 | -4.764952000 | -4.651629000 |
| 50                          |              |              |              |
| B6 GS CAM-B3LYP/6-31+G(d,p) |              |              |              |
| N                           | 0.000000000  | 1.231189000  | -1.641508000 |
| C                           | -0.025313000 | 1.142140000  | -0.249424000 |
| C                           | -0.034896000 | 2.471716000  | 0.283883000  |
| C                           | 0.002212000  | 3.321894000  | -0.808597000 |
| C                           | 0.016917000  | 2.534100000  | -1.979250000 |
| N                           | 0.000000000  | -1.231189000 | -1.641508000 |
| C                           | 0.025313000  | -1.142140000 | -0.249424000 |
| C                           | 0.034896000  | -2.471716000 | 0.283883000  |
| C                           | -0.002212000 | -3.321894000 | -0.808597000 |
| C                           | -0.016917000 | -2.534100000 | -1.979250000 |
| B                           | 0.000000000  | 0.000000000  | -2.576367000 |
| N                           | 0.000000000  | 0.000000000  | 0.406859000  |
| F                           | 1.141780000  | -0.000615000 | -3.390988000 |
| F                           | -1.141780000 | 0.000615000  | -3.390988000 |
| H                           | 0.006082000  | 4.399798000  | -0.774154000 |
| H                           | -0.006082000 | -4.399798000 | -0.774154000 |
| C                           | 0.076552000  | -2.885666000 | 1.693636000  |
| N                           | -0.281854000 | -4.158863000 | 1.936199000  |
| C                           | 0.492040000  | -2.025175000 | 2.715146000  |
| C                           | -0.246418000 | -4.598665000 | 3.191906000  |
| C                           | 0.522574000  | -2.498145000 | 4.021244000  |
| C                           | 0.144920000  | -3.810996000 | 4.272464000  |
| H                           | 0.786725000  | -1.011040000 | 2.480678000  |
| H                           | -0.545819000 | -5.632265000 | 3.346244000  |
| H                           | 0.843143000  | -1.848687000 | 4.829345000  |
| H                           | 0.154195000  | -4.222996000 | 5.275286000  |

|   |              |              |              |
|---|--------------|--------------|--------------|
| C | -0.076552000 | 2.885666000  | 1.693636000  |
| N | 0.281854000  | 4.158863000  | 1.936199000  |
| C | -0.492040000 | 2.025175000  | 2.715146000  |
| C | 0.246418000  | 4.598665000  | 3.191906000  |
| C | -0.522574000 | 2.498145000  | 4.021244000  |
| C | -0.144920000 | 3.810996000  | 4.272464000  |
| H | -0.786725000 | 1.011040000  | 2.480678000  |
| H | 0.545819000  | 5.632265000  | 3.346244000  |
| H | -0.843143000 | 1.848687000  | 4.829345000  |
| H | -0.154195000 | 4.222996000  | 5.275286000  |
| C | -0.043667000 | -2.989504000 | -3.401715000 |
| H | -0.929978000 | -2.557478000 | -3.879963000 |
| H | 0.813107000  | -2.543015000 | -3.918737000 |
| C | -0.035670000 | -4.505424000 | -3.573594000 |
| H | -0.907793000 | -4.967645000 | -3.102773000 |
| H | 0.863008000  | -4.954001000 | -3.141046000 |
| H | -0.056894000 | -4.758135000 | -4.636104000 |
| C | 0.043667000  | 2.989504000  | -3.401715000 |
| H | 0.929978000  | 2.557478000  | -3.879963000 |
| H | -0.813107000 | 2.543015000  | -3.918737000 |
| C | 0.035670000  | 4.505424000  | -3.573594000 |
| H | 0.907793000  | 4.967645000  | -3.102773000 |
| H | -0.863008000 | 4.954001000  | -3.141046000 |
| H | 0.056894000  | 4.758135000  | -4.636104000 |

32

B7 GS CAM-B3LYP/6-31+G(d,p)

|   |             |             |             |
|---|-------------|-------------|-------------|
| N | 0.000000000 | 1.231838000 | 0.251175000 |
| C | 0.000000000 | 1.139069000 | 1.646559000 |
| C | 0.000000000 | 2.454835000 | 2.176601000 |

|   |              |              |              |
|---|--------------|--------------|--------------|
| C | 0.000000000  | 3.319632000  | 1.104976000  |
| C | 0.000000000  | 2.534337000  | -0.078893000 |
| N | 0.000000000  | -1.231838000 | 0.251175000  |
| C | 0.000000000  | -1.139069000 | 1.646559000  |
| C | 0.000000000  | -2.454835000 | 2.176601000  |
| C | 0.000000000  | -3.319632000 | 1.104976000  |
| C | 0.000000000  | -2.534337000 | -0.078893000 |
| B | 0.000000000  | 0.000000000  | -0.685947000 |
| N | 0.000000000  | 0.000000000  | 2.310980000  |
| F | 1.142029000  | 0.000000000  | -1.499257000 |
| F | -1.142029000 | 0.000000000  | -1.499257000 |
| H | 0.000000000  | 4.398816000  | 1.133708000  |
| H | 0.000000000  | -4.398816000 | 1.133708000  |
| C | 0.000000000  | -2.998940000 | -1.498823000 |
| H | -0.871883000 | -2.563162000 | -1.999646000 |
| H | 0.871883000  | -2.563162000 | -1.999646000 |
| C | 0.000000000  | -4.515998000 | -1.661532000 |
| H | -0.885797000 | -4.968896000 | -1.207379000 |
| H | 0.885797000  | -4.968896000 | -1.207379000 |
| H | 0.000000000  | -4.775088000 | -2.722711000 |
| C | 0.000000000  | 2.998940000  | -1.498823000 |
| H | 0.871883000  | 2.563162000  | -1.999646000 |
| H | -0.871883000 | 2.563162000  | -1.999646000 |
| C | 0.000000000  | 4.515998000  | -1.661532000 |
| H | 0.885797000  | 4.968896000  | -1.207379000 |
| H | -0.885797000 | 4.968896000  | -1.207379000 |
| H | 0.000000000  | 4.775088000  | -2.722711000 |
| H | 0.000000000  | -2.691636000 | 3.231250000  |
| H | 0.000000000  | 2.691636000  | 3.231250000  |



## C1 GS CAM-B3LYP/6-31+G(d,p)

|   |              |              |              |
|---|--------------|--------------|--------------|
| N | -0.678532000 | -1.252136000 | 0.147489000  |
| C | 0.712686000  | -1.140964000 | 0.180105000  |
| C | 1.287658000  | -2.448959000 | 0.084973000  |
| C | 0.217871000  | -3.315737000 | -0.045170000 |
| C | -0.978433000 | -2.563626000 | 0.009717000  |
| N | -0.695442000 | 1.237801000  | 0.113872000  |
| C | 0.697586000  | 1.143782000  | 0.096360000  |
| C | 1.252018000  | 2.455232000  | -0.049389000 |
| C | 0.166983000  | 3.309374000  | -0.128905000 |
| C | -1.016956000 | 2.544454000  | -0.024934000 |
| B | -1.599969000 | -0.011261000 | 0.297623000  |
| N | 1.356853000  | 0.005954000  | 0.156389000  |
| F | -2.144033000 | -0.000847000 | 1.599431000  |
| F | -2.618534000 | -0.029368000 | -0.649672000 |
| H | 0.258978000  | -4.392974000 | -0.110774000 |
| H | 0.192957000  | 4.382172000  | -0.250320000 |
| C | -2.372391000 | 3.110145000  | -0.080453000 |
| C | -3.422517000 | 2.655640000  | 0.727487000  |
| C | -2.602730000 | 4.188735000  | -0.947916000 |
| C | -4.670631000 | 3.264850000  | 0.661988000  |
| C | -3.854642000 | 4.787489000  | -1.017005000 |
| C | -4.893536000 | 4.327697000  | -0.210435000 |
| H | -3.259011000 | 1.836710000  | 1.415583000  |
| H | -1.802252000 | 4.545489000  | -1.587376000 |
| H | -5.472802000 | 2.907450000  | 1.299664000  |
| H | -4.018783000 | 5.612140000  | -1.702991000 |
| H | -5.871006000 | 4.796744000  | -0.260211000 |

|   |              |              |              |
|---|--------------|--------------|--------------|
| C | -2.324434000 | -3.147631000 | -0.062397000 |
| C | -2.523534000 | -4.245364000 | -0.913233000 |
| C | -3.395762000 | -2.690766000 | 0.715961000  |
| C | -3.766566000 | -4.860551000 | -0.996267000 |
| C | -4.634757000 | -3.316468000 | 0.637091000  |
| C | -4.826891000 | -4.398146000 | -0.219567000 |
| H | -1.705106000 | -4.604204000 | -1.528443000 |
| H | -3.255725000 | -1.857303000 | 1.391897000  |
| H | -3.907069000 | -5.700143000 | -1.669222000 |
| H | -5.454039000 | -2.957493000 | 1.251673000  |
| H | -5.797495000 | -4.880019000 | -0.280009000 |
| C | 2.713202000  | -2.789212000 | 0.103208000  |
| C | 3.168802000  | -3.915371000 | -0.597702000 |
| C | 3.639282000  | -2.027537000 | 0.829806000  |
| C | 4.512481000  | -4.269088000 | -0.575320000 |
| C | 4.983293000  | -2.384585000 | 0.851001000  |
| C | 5.425111000  | -3.504224000 | 0.149430000  |
| H | 2.467391000  | -4.505912000 | -1.178210000 |
| H | 3.300695000  | -1.160696000 | 1.384147000  |
| H | 4.848887000  | -5.140048000 | -1.128650000 |
| H | 5.687183000  | -1.788072000 | 1.422689000  |
| H | 6.474602000  | -3.780382000 | 0.167775000  |
| C | 2.671569000  | 2.823145000  | -0.101374000 |
| C | 3.638088000  | 1.968101000  | -0.649784000 |
| C | 3.078313000  | 4.074052000  | 0.385779000  |
| C | 4.972293000  | 2.357315000  | -0.706810000 |
| C | 4.412436000  | 4.459124000  | 0.328602000  |
| C | 5.365220000  | 3.601407000  | -0.218369000 |
| H | 3.338785000  | 1.002384000  | -1.037559000 |

|   |             |             |              |
|---|-------------|-------------|--------------|
| H | 2.345937000 | 4.741052000 | 0.828987000  |
| H | 5.707207000 | 1.686314000 | -1.140245000 |
| H | 4.709517000 | 5.428233000 | 0.716608000  |
| H | 6.407264000 | 3.901579000 | -0.264069000 |

54

C2 GS CAM-B3LYP/6-31+G(d,p)

|   |              |              |              |
|---|--------------|--------------|--------------|
| N | 0.297125000  | 1.299549000  | 0.157720000  |
| C | -0.998759000 | 0.782387000  | 0.194331000  |
| C | -1.932094000 | 1.867558000  | 0.100020000  |
| C | -1.162578000 | 3.010853000  | -0.043693000 |
| C | 0.198095000  | 2.641307000  | 0.007162000  |
| N | 1.052428000  | -1.069330000 | 0.151359000  |
| C | -0.303232000 | -1.390928000 | 0.140531000  |
| C | -0.446763000 | -2.806112000 | -0.010886000 |
| C | 0.846383000  | -3.303045000 | -0.106316000 |
| C | 1.745689000  | -2.225148000 | 0.001175000  |
| B | 1.546393000  | 0.390595000  | 0.319370000  |
| N | -1.275238000 | -0.503517000 | 0.184594000  |
| F | 2.069827000  | 0.559440000  | 1.619255000  |
| F | 2.514446000  | 0.700447000  | -0.630814000 |
| H | -1.518063000 | 4.028114000  | -0.118758000 |
| H | 1.140335000  | -4.335028000 | -0.224508000 |
| C | -1.674079000 | -3.571065000 | -0.063863000 |
| S | -3.256385000 | -2.853581000 | -0.182385000 |
| C | -1.770915000 | -4.944689000 | -0.045048000 |
| C | -4.012717000 | -4.397598000 | -0.204865000 |
| C | -3.106682000 | -5.417270000 | -0.123359000 |
| H | -0.908282000 | -5.595247000 | 0.033113000  |
| H | -5.089634000 | -4.468403000 | -0.275733000 |

|   |              |              |              |
|---|--------------|--------------|--------------|
| H | -3.379719000 | -6.465296000 | -0.118101000 |
| C | -3.373899000 | 1.768116000  | 0.148332000  |
| S | -4.375156000 | 3.060329000  | -0.453949000 |
| C | -4.149425000 | 0.756499000  | 0.663908000  |
| C | -5.812162000 | 2.226918000  | -0.009683000 |
| C | -5.542839000 | 1.020128000  | 0.571594000  |
| H | -3.726435000 | -0.138551000 | 1.099007000  |
| H | -6.777605000 | 2.672526000  | -0.206265000 |
| H | -6.310915000 | 0.343549000  | 0.925863000  |
| C | 1.313482000  | 3.593425000  | -0.081680000 |
| C | 2.470744000  | 3.485473000  | 0.699966000  |
| C | 1.181231000  | 4.685879000  | -0.951915000 |
| C | 3.470565000  | 4.446886000  | 0.605676000  |
| C | 2.188203000  | 5.638199000  | -1.050305000 |
| C | 3.336674000  | 5.522078000  | -0.270026000 |
| H | 2.581479000  | 2.659235000  | 1.390056000  |
| H | 0.294090000  | 4.776924000  | -1.569824000 |
| H | 4.358510000  | 4.355805000  | 1.222981000  |
| H | 2.076115000  | 6.470059000  | -1.738024000 |
| H | 4.122410000  | 6.267270000  | -0.342452000 |
| C | 3.208313000  | -2.360387000 | -0.054368000 |
| C | 4.071881000  | -1.621490000 | 0.764121000  |
| C | 3.752477000  | -3.311236000 | -0.930616000 |
| C | 5.445203000  | -1.829602000 | 0.700880000  |
| C | 5.126312000  | -3.508704000 | -0.997036000 |
| C | 5.977917000  | -2.768520000 | -0.179622000 |
| H | 3.668623000  | -0.895204000 | 1.457706000  |
| H | 3.096248000  | -3.883084000 | -1.578211000 |
| H | 6.102218000  | -1.255691000 | 1.346499000  |

|   |             |              |              |
|---|-------------|--------------|--------------|
| H | 5.531519000 | -4.239369000 | -1.689506000 |
| H | 7.050989000 | -2.923916000 | -0.227522000 |

54

C3 GS CAM-B3LYP/6-31+G(d,p)

|   |              |              |              |
|---|--------------|--------------|--------------|
| N | 0.000000000  | 1.247306000  | -0.396909000 |
| C | 0.007116000  | 1.140058000  | 0.993994000  |
| C | -0.073306000 | 2.452384000  | 1.556356000  |
| C | -0.186768000 | 3.322187000  | 0.483773000  |
| C | -0.136609000 | 2.562193000  | -0.702566000 |
| N | 0.000000000  | -1.247306000 | -0.396909000 |
| C | -0.007116000 | -1.140058000 | 0.993994000  |
| C | 0.073306000  | -2.452384000 | 1.556356000  |
| C | 0.186768000  | -3.322187000 | 0.483773000  |
| C | 0.136609000  | -2.562193000 | -0.702566000 |
| B | 0.000000000  | 0.000000000  | -1.325403000 |
| N | 0.000000000  | 0.000000000  | 1.650853000  |
| F | 1.146708000  | -0.046697000 | -2.128224000 |
| F | -1.146708000 | 0.046697000  | -2.128224000 |
| H | -0.251689000 | 4.398633000  | 0.528511000  |
| H | 0.251689000  | -4.398633000 | 0.528511000  |
| C | 0.032400000  | -2.790768000 | 2.951874000  |
| O | 0.311633000  | -4.091742000 | 3.269742000  |
| C | -0.265309000 | -2.098839000 | 4.093888000  |
| C | 0.195185000  | -4.214648000 | 4.613690000  |
| C | -0.156559000 | -3.025424000 | 5.171590000  |
| H | -0.543016000 | -1.057777000 | 4.142649000  |
| H | 0.391896000  | -5.195180000 | 5.018604000  |
| H | -0.322155000 | -2.833148000 | 6.221373000  |
| C | -0.032400000 | 2.790768000  | 2.951874000  |

|   |              |              |              |
|---|--------------|--------------|--------------|
| O | -0.311633000 | 4.091742000  | 3.269742000  |
| C | 0.265309000  | 2.098839000  | 4.093888000  |
| C | -0.195185000 | 4.214648000  | 4.613690000  |
| C | 0.156559000  | 3.025424000  | 5.171590000  |
| H | 0.543016000  | 1.057777000  | 4.142649000  |
| H | -0.391896000 | 5.195180000  | 5.018604000  |
| H | 0.322155000  | 2.833148000  | 6.221373000  |
| C | -0.235273000 | 3.142402000  | -2.049780000 |
| C | 0.549612000  | 2.716435000  | -3.128603000 |
| C | -1.124255000 | 4.211639000  | -2.238764000 |
| C | 0.439208000  | 3.343102000  | -4.365217000 |
| C | -1.237838000 | 4.827947000  | -3.478733000 |
| C | -0.454612000 | 4.395754000  | -4.547054000 |
| H | 1.250831000  | 1.903318000  | -2.997557000 |
| H | -1.744368000 | 4.546496000  | -1.413937000 |
| H | 1.059150000  | 3.007511000  | -5.190370000 |
| H | -1.939884000 | 5.644841000  | -3.610574000 |
| H | -0.539142000 | 4.878480000  | -5.515436000 |
| C | 0.235273000  | -3.142402000 | -2.049780000 |
| C | -0.549612000 | -2.716435000 | -3.128603000 |
| C | 1.124255000  | -4.211639000 | -2.238764000 |
| C | -0.439208000 | -3.343102000 | -4.365217000 |
| C | 1.237838000  | -4.827947000 | -3.478733000 |
| C | 0.454612000  | -4.395754000 | -4.547054000 |
| H | -1.250831000 | -1.903318000 | -2.997557000 |
| H | 1.744368000  | -4.546496000 | -1.413937000 |
| H | -1.059150000 | -3.007511000 | -5.190370000 |
| H | 1.939884000  | -5.644841000 | -3.610574000 |
| H | 0.539142000  | -4.878480000 | -5.515436000 |

## C4 GS CAM-B3LYP/6-31+G(d,p)

|   |              |              |              |
|---|--------------|--------------|--------------|
| N | 0.083443000  | 1.246668000  | -0.670847000 |
| C | 0.077395000  | 1.141891000  | 0.721053000  |
| C | 0.058739000  | 2.457192000  | 1.284682000  |
| C | 0.000000000  | 3.324552000  | 0.213442000  |
| C | 0.022146000  | 2.563566000  | -0.978591000 |
| N | -0.083443000 | -1.246668000 | -0.670847000 |
| C | -0.077395000 | -1.141891000 | 0.721053000  |
| C | -0.058739000 | -2.457192000 | 1.284682000  |
| C | 0.000000000  | -3.324552000 | 0.213442000  |
| C | -0.022146000 | -2.563566000 | -0.978591000 |
| B | 0.000000000  | 0.000000000  | -1.599375000 |
| N | 0.000000000  | 0.000000000  | 1.370117000  |
| F | 1.141437000  | -0.124211000 | -2.398992000 |
| F | -1.141437000 | 0.124211000  | -2.398992000 |
| H | -0.011568000 | 4.402258000  | 0.263517000  |
| H | 0.011568000  | -4.402258000 | 0.263517000  |
| C | -0.092435000 | -2.838583000 | 2.703881000  |
| N | 0.316315000  | -4.089743000 | 2.977867000  |
| C | -0.552635000 | -1.972657000 | 3.700877000  |
| C | 0.287446000  | -4.502142000 | 4.243074000  |
| C | -0.575802000 | -2.416900000 | 5.017274000  |
| C | -0.146291000 | -3.706814000 | 5.301626000  |
| H | -0.885413000 | -0.976540000 | 3.441239000  |
| H | 0.627993000  | -5.518551000 | 4.423750000  |
| H | -0.930474000 | -1.763260000 | 5.807534000  |
| H | -0.147756000 | -4.095899000 | 6.313602000  |
| C | 0.092435000  | 2.838583000  | 2.703881000  |

|   |              |              |              |
|---|--------------|--------------|--------------|
| N | -0.316315000 | 4.089743000  | 2.977867000  |
| C | 0.552635000  | 1.972657000  | 3.700877000  |
| C | -0.287446000 | 4.502142000  | 4.243074000  |
| C | 0.575802000  | 2.416900000  | 5.017274000  |
| C | 0.146291000  | 3.706814000  | 5.301626000  |
| H | 0.885413000  | 0.976540000  | 3.441239000  |
| H | -0.627993000 | 5.518551000  | 4.423750000  |
| H | 0.930474000  | 1.763260000  | 5.807534000  |
| H | 0.147756000  | 4.095899000  | 6.313602000  |
| C | -0.026874000 | 3.149843000  | -2.324613000 |
| C | 0.734490000  | 2.672034000  | -3.398872000 |
| C | -0.839885000 | 4.277515000  | -2.518042000 |
| C | 0.674398000  | 3.305031000  | -4.635563000 |
| C | -0.904492000 | 4.899537000  | -3.758440000 |
| C | -0.145659000 | 4.415332000  | -4.822149000 |
| H | 1.379225000  | 1.814109000  | -3.263948000 |
| H | -1.440278000 | 4.654396000  | -1.696803000 |
| H | 1.275747000  | 2.928931000  | -5.456961000 |
| H | -1.548724000 | 5.762100000  | -3.894235000 |
| H | -0.191393000 | 4.902893000  | -5.790713000 |
| C | 0.026874000  | -3.149843000 | -2.324613000 |
| C | -0.734490000 | -2.672034000 | -3.398872000 |
| C | 0.839885000  | -4.277515000 | -2.518042000 |
| C | -0.674398000 | -3.305031000 | -4.635563000 |
| C | 0.904492000  | -4.899537000 | -3.758440000 |
| C | 0.145659000  | -4.415332000 | -4.822149000 |
| H | -1.379225000 | -1.814109000 | -3.263948000 |
| H | 1.440278000  | -4.654396000 | -1.696803000 |
| H | -1.275747000 | -2.928931000 | -5.456961000 |



|                             |              |              |              |
|-----------------------------|--------------|--------------|--------------|
| H                           | 1.548724000  | -5.762100000 | -3.894235000 |
| H                           | 0.191393000  | -4.902893000 | -5.790713000 |
| 58                          |              |              |              |
| C5 GS CAM-B3LYP/6-31+G(d,p) |              |              |              |
| N                           | -0.683215000 | 1.250404000  | -0.149982000 |
| C                           | 0.706899000  | 1.145142000  | -0.176445000 |
| C                           | 1.272722000  | 2.455058000  | -0.075538000 |
| C                           | 0.202892000  | 3.318310000  | 0.045838000  |
| C                           | -0.992236000 | 2.559321000  | -0.016119000 |
| N                           | -0.684774000 | -1.243288000 | -0.114123000 |
| C                           | 0.706072000  | -1.138986000 | -0.103512000 |
| C                           | 1.267689000  | -2.446971000 | 0.038240000  |
| C                           | 0.193407000  | -3.308662000 | 0.127993000  |
| C                           | -0.998820000 | -2.550002000 | 0.029750000  |
| B                           | -1.599567000 | 0.001947000  | -0.298309000 |
| N                           | 1.358485000  | 0.002299000  | -0.158281000 |
| F                           | -2.139592000 | -0.013926000 | -1.598577000 |
| F                           | -2.612607000 | 0.014778000  | 0.651477000  |
| H                           | 0.239489000  | 4.395587000  | 0.112918000  |
| H                           | 0.227174000  | -4.381120000 | 0.249955000  |
| C                           | 2.690874000  | -2.803112000 | 0.080234000  |
| C                           | 3.669131000  | -1.939056000 | 0.582474000  |
| C                           | 3.115473000  | -4.056977000 | -0.372321000 |
| C                           | 4.992598000  | -2.362227000 | 0.608239000  |
| C                           | 4.463223000  | -4.383231000 | -0.303116000 |
| N                           | 5.400240000  | -3.559769000 | 0.177465000  |
| H                           | 2.411582000  | -4.767932000 | -0.790126000 |
| H                           | 5.763125000  | -1.702963000 | 0.999118000  |
| H                           | 4.805978000  | -5.352966000 | -0.654022000 |

|   |              |              |              |
|---|--------------|--------------|--------------|
| H | 3.406451000  | -0.956437000 | 0.951658000  |
| C | 2.698179000  | 2.799231000  | -0.082526000 |
| C | 3.645446000  | 2.040905000  | -0.777373000 |
| C | 3.157648000  | 3.930053000  | 0.600559000  |
| C | 4.976082000  | 2.440919000  | -0.755563000 |
| C | 4.509432000  | 4.244344000  | 0.559206000  |
| N | 5.417347000  | 3.521060000  | -0.104005000 |
| H | 3.353682000  | 1.158199000  | -1.331689000 |
| H | 2.477944000  | 4.551446000  | 1.172758000  |
| H | 5.723509000  | 1.863384000  | -1.293024000 |
| H | 4.880485000  | 5.118444000  | 1.087590000  |
| C | -2.339925000 | 3.137272000  | 0.049505000  |
| C | -3.408909000 | 2.667854000  | -0.724910000 |
| C | -2.543961000 | 4.241536000  | 0.891120000  |
| C | -4.650813000 | 3.287881000  | -0.650928000 |
| C | -3.790164000 | 4.850268000  | 0.969590000  |
| C | -4.848066000 | 4.375478000  | 0.197003000  |
| H | -3.264894000 | 1.830664000  | -1.395212000 |
| H | -1.727910000 | 4.610243000  | 1.503579000  |
| H | -5.468242000 | 2.919981000  | -1.262559000 |
| H | -3.935086000 | 5.694621000  | 1.635488000  |
| H | -5.821093000 | 4.852818000  | 0.253618000  |
| C | -2.348560000 | -3.125170000 | 0.091209000  |
| C | -3.407736000 | -2.672743000 | -0.706356000 |
| C | -2.564222000 | -4.210179000 | 0.954801000  |
| C | -4.651032000 | -3.290367000 | -0.633894000 |
| C | -3.811794000 | -4.816391000 | 1.031341000  |
| C | -4.859804000 | -4.358671000 | 0.235398000  |
| H | -3.255032000 | -1.850623000 | -1.393031000 |

|   |              |              |              |
|---|--------------|--------------|--------------|
| H | -1.756731000 | -4.565562000 | 1.586104000  |
| H | -5.460487000 | -2.935529000 | -1.263599000 |
| H | -3.965427000 | -5.645408000 | 1.714355000  |
| H | -5.833814000 | -4.834159000 | 0.290645000  |

58

C6 GS CAM-B3LYP/6-31+G(d,p)

|   |              |              |              |
|---|--------------|--------------|--------------|
| N | -0.663419000 | 1.253599000  | -0.139885000 |
| C | 0.727290000  | 1.152338000  | -0.172305000 |
| C | 1.287416000  | 2.464747000  | -0.061379000 |
| C | 0.215944000  | 3.321775000  | 0.081815000  |
| C | -0.975436000 | 2.560845000  | 0.014352000  |
| N | -0.661916000 | -1.238352000 | -0.133492000 |
| C | 0.730370000  | -1.136958000 | -0.116564000 |
| C | 1.286275000  | -2.449991000 | 0.023420000  |
| C | 0.208254000  | -3.307666000 | 0.101053000  |
| C | -0.979512000 | -2.546264000 | 0.000423000  |
| B | -1.575596000 | 0.007144000  | -0.304980000 |
| N | 1.378255000  | 0.008018000  | -0.161586000 |
| F | -2.115606000 | 0.007776000  | -1.607201000 |
| F | -2.593109000 | 0.006055000  | 0.641943000  |
| H | 0.265080000  | 4.395176000  | 0.179750000  |
| H | 0.254847000  | -4.380790000 | 0.199676000  |
| C | 2.700969000  | -2.849670000 | 0.086206000  |
| N | 2.933163000  | -4.165840000 | -0.063157000 |
| C | 3.735502000  | -1.936054000 | 0.310694000  |
| C | 4.189707000  | -4.599399000 | -0.001766000 |
| C | 5.042708000  | -2.403637000 | 0.372138000  |
| C | 5.282703000  | -3.762047000 | 0.211746000  |
| H | 3.509992000  | -0.885949000 | 0.437159000  |

|   |              |              |              |
|---|--------------|--------------|--------------|
| H | 4.334379000  | -5.669190000 | -0.129776000 |
| H | 5.860791000  | -1.712581000 | 0.547604000  |
| H | 6.286012000  | -4.170920000 | 0.252580000  |
| C | 2.706223000  | 2.846078000  | -0.084485000 |
| N | 3.000463000  | 4.033235000  | 0.473267000  |
| C | 3.682454000  | 2.043273000  | -0.682634000 |
| C | 4.267921000  | 4.440235000  | 0.461150000  |
| C | 5.001405000  | 2.480379000  | -0.685917000 |
| C | 5.307574000  | 3.702429000  | -0.100940000 |
| H | 3.404774000  | 1.102560000  | -1.139527000 |
| H | 4.466297000  | 5.403664000  | 0.923870000  |
| H | 5.776074000  | 1.875407000  | -1.145713000 |
| H | 6.322191000  | 4.084041000  | -0.081029000 |
| C | -2.325287000 | 3.132860000  | 0.093987000  |
| C | -3.395796000 | 2.672068000  | -0.683482000 |
| C | -2.529768000 | 4.224248000  | 0.952048000  |
| C | -4.639258000 | 3.287470000  | -0.596444000 |
| C | -3.777382000 | 4.828465000  | 1.043477000  |
| C | -4.836796000 | 4.362148000  | 0.267771000  |
| H | -3.251731000 | 1.844733000  | -1.365977000 |
| H | -1.712000000 | 4.586589000  | 1.565986000  |
| H | -5.457763000 | 2.926045000  | -1.210576000 |
| H | -3.922122000 | 5.662883000  | 1.721893000  |
| H | -5.810943000 | 4.835945000  | 0.334554000  |
| C | -2.331042000 | -3.119517000 | 0.046372000  |
| C | -3.385332000 | -2.657848000 | -0.752355000 |
| C | -2.553025000 | -4.214362000 | 0.895866000  |
| C | -4.629441000 | -3.275576000 | -0.694719000 |
| C | -3.801251000 | -4.821036000 | 0.957724000  |

|   |              |              |              |
|---|--------------|--------------|--------------|
| C | -4.844313000 | -4.353747000 | 0.160807000  |
| H | -3.228155000 | -1.827715000 | -1.428233000 |
| H | -1.748703000 | -4.577778000 | 1.526575000  |
| H | -5.434795000 | -2.912969000 | -1.325343000 |
| H | -3.959212000 | -5.658141000 | 1.629868000  |
| H | -5.818889000 | -4.829356000 | 0.204489000  |

40

C7 GS CAM-B3LYP/6-31+G(d,p)

|   |              |              |              |
|---|--------------|--------------|--------------|
| N | 1.173558000  | 0.107117000  | 1.247060000  |
| C | 2.567742000  | 0.099044000  | 1.141476000  |
| C | 3.121818000  | -0.027242000 | 2.440756000  |
| C | 2.067432000  | -0.118845000 | 3.313911000  |
| C | 0.865431000  | -0.025108000 | 2.555590000  |
| N | 1.173558000  | 0.107117000  | -1.247060000 |
| C | 2.567742000  | 0.099044000  | -1.141476000 |
| C | 3.121818000  | -0.027242000 | -2.440756000 |
| C | 2.067432000  | -0.118845000 | -3.313911000 |
| C | 0.865431000  | -0.025108000 | -2.555590000 |
| B | 0.259749000  | 0.281585000  | 0.000000000  |
| N | 3.225999000  | 0.109295000  | 0.000000000  |
| F | -0.269677000 | 1.587362000  | 0.000000000  |
| F | -0.763604000 | -0.658543000 | 0.000000000  |
| H | 2.109225000  | -0.214170000 | 4.388744000  |
| H | 2.109225000  | -0.214170000 | -4.388744000 |
| C | -0.481897000 | -0.071259000 | -3.137046000 |
| C | -1.542164000 | 0.717871000  | -2.671942000 |
| C | -0.695424000 | -0.911012000 | -4.241236000 |
| C | -2.783591000 | 0.659824000  | -3.294883000 |
| C | -1.940935000 | -0.973015000 | -4.853440000 |

|   |              |              |              |
|---|--------------|--------------|--------------|
| C | -2.989838000 | -0.185989000 | -4.382393000 |
| H | -1.391411000 | 1.387050000  | -1.835158000 |
| H | 0.112860000  | -1.534926000 | -4.607662000 |
| H | -3.593545000 | 1.282770000  | -2.929296000 |
| H | -2.092350000 | -1.637613000 | -5.697738000 |
| H | -3.962269000 | -0.229830000 | -4.862325000 |
| C | -0.481897000 | -0.071259000 | 3.137046000  |
| C | -0.695424000 | -0.911012000 | 4.241236000  |
| C | -1.542164000 | 0.717871000  | 2.671942000  |
| C | -1.940935000 | -0.973015000 | 4.853440000  |
| C | -2.783591000 | 0.659824000  | 3.294883000  |
| C | -2.989838000 | -0.185989000 | 4.382393000  |
| H | 0.112860000  | -1.534926000 | 4.607662000  |
| H | -1.391411000 | 1.387050000  | 1.835158000  |
| H | -2.092350000 | -1.637613000 | 5.697738000  |
| H | -3.593545000 | 1.282770000  | 2.929296000  |
| H | -3.962269000 | -0.229830000 | 4.862325000  |
| H | 4.180532000  | -0.054906000 | 2.655816000  |
| H | 4.180532000  | -0.054906000 | -2.655816000 |

40

D1 GS CAM-B3LYP/6-31+G(d,p)

|   |              |              |             |
|---|--------------|--------------|-------------|
| N | 0.014242000  | 1.224168000  | 2.316483000 |
| C | -0.013086000 | 1.140936000  | 0.923446000 |
| C | 0.000000000  | 2.472393000  | 0.388294000 |
| C | 0.051251000  | 3.321057000  | 1.489347000 |
| C | 0.053867000  | 2.520050000  | 2.641226000 |
| N | -0.014242000 | -1.224168000 | 2.316483000 |
| C | 0.013086000  | -1.140936000 | 0.923446000 |
| C | 0.000000000  | -2.472393000 | 0.388294000 |

|   |              |              |              |
|---|--------------|--------------|--------------|
| C | -0.051251000 | -3.321057000 | 1.489347000  |
| C | -0.053867000 | -2.520050000 | 2.641226000  |
| B | 0.000000000  | 0.000000000  | 3.260678000  |
| N | 0.000000000  | 0.000000000  | 0.264740000  |
| F | -1.140011000 | 0.010863000  | 4.071893000  |
| F | 1.140011000  | -0.010863000 | 4.071893000  |
| C | -0.023086000 | 2.856006000  | -1.025655000 |
| H | 0.055504000  | 4.400989000  | 1.483005000  |
| H | -0.055504000 | -4.400989000 | 1.483005000  |
| C | 0.023086000  | -2.856006000 | -1.025655000 |
| C | -0.689437000 | 2.466020000  | -3.323721000 |
| C | -0.665231000 | 2.067584000  | -1.991569000 |
| C | 0.564817000  | 4.445746000  | -2.762431000 |
| C | 0.689437000  | -2.466020000 | -3.323721000 |
| C | -0.075311000 | 3.653908000  | -3.714512000 |
| C | 0.589865000  | 4.051302000  | -1.430367000 |
| C | 0.665231000  | -2.067584000 | -1.991569000 |
| C | 0.075311000  | -3.653908000 | -3.714512000 |
| H | -0.095933000 | 3.962042000  | -4.754992000 |
| H | 1.152729000  | -1.147569000 | -1.693383000 |
| H | 0.095933000  | -3.962042000 | -4.754992000 |
| H | 1.050082000  | 5.370079000  | -3.058987000 |
| H | 1.195718000  | -1.847941000 | -4.058354000 |
| H | 1.105549000  | 4.664667000  | -0.698677000 |
| C | -0.589865000 | -4.051302000 | -1.430367000 |
| C | -0.564817000 | -4.445746000 | -2.762431000 |
| H | -1.195718000 | 1.847941000  | -4.058354000 |
| H | -1.152729000 | 1.147569000  | -1.693383000 |
| H | -1.105549000 | -4.664667000 | -0.698677000 |

|   |              |              |              |
|---|--------------|--------------|--------------|
| H | -1.050082000 | -5.370079000 | -3.058987000 |
| H | 0.073607000  | 2.834484000  | 3.676340000  |
| H | -0.073607000 | -2.834484000 | 3.676340000  |

34

D2 GS CAM-B3LYP/6-31+G(d,p)

|   |              |              |              |
|---|--------------|--------------|--------------|
| N | 0.868530000  | 2.352886000  | 0.005119000  |
| C | 0.915339000  | 0.958852000  | -0.032612000 |
| C | 2.295963000  | 0.555046000  | -0.038733000 |
| C | 3.036580000  | 1.735400000  | 0.015213000  |
| C | 2.129216000  | 2.800161000  | 0.037478000  |
| N | -1.566022000 | 2.131321000  | -0.020212000 |
| C | -1.353614000 | 0.754896000  | -0.013823000 |
| C | -2.628138000 | 0.097685000  | -0.008160000 |
| C | -3.581188000 | 1.118964000  | -0.021169000 |
| C | -2.891169000 | 2.334048000  | -0.027359000 |
| B | -0.435918000 | 3.181903000  | -0.004607000 |
| N | -0.158833000 | 0.197502000  | -0.029354000 |
| F | -0.497154000 | 3.996402000  | -1.141960000 |
| F | -0.517996000 | 3.987963000  | 1.137060000  |
| H | 4.112293000  | 1.833359000  | 0.019032000  |
| H | -4.655424000 | 1.012524000  | -0.010259000 |
| C | -2.885083000 | -1.324510000 | 0.005977000  |
| S | -1.659646000 | -2.521551000 | 0.319475000  |
| C | -4.105618000 | -1.930355000 | -0.197869000 |
| C | -2.797104000 | -3.801692000 | 0.173281000  |
| C | -4.055045000 | -3.344827000 | -0.104838000 |
| H | -5.009406000 | -1.375545000 | -0.418606000 |
| H | -2.473805000 | -4.826176000 | 0.298289000  |
| H | -4.912785000 | -3.991966000 | -0.240055000 |



|   |              |              |              |
|---|--------------|--------------|--------------|
| C | 2.798721000  | -0.797966000 | -0.094281000 |
| S | 4.475936000  | -1.134303000 | 0.240471000  |
| C | 2.130031000  | -1.956821000 | -0.417465000 |
| C | 4.254418000  | -2.812848000 | -0.053684000 |
| C | 2.963253000  | -3.106419000 | -0.392463000 |
| H | 1.078365000  | -1.972495000 | -0.668260000 |
| H | 5.089628000  | -3.492798000 | 0.043218000  |
| H | 2.618803000  | -4.107726000 | -0.620074000 |
| H | 2.342647000  | 3.860330000  | 0.068427000  |
| H | -3.300120000 | 3.335700000  | -0.029531000 |

34

D3 GS CAM-B3LYP/6-31+G(d,p)

|   |              |              |              |
|---|--------------|--------------|--------------|
| N | -0.020866000 | 1.222386000  | -1.993564000 |
| C | 0.002232000  | 1.138036000  | -0.601946000 |
| C | 0.000000000  | 2.472734000  | -0.076619000 |
| C | -0.042699000 | 3.326309000  | -1.178182000 |
| C | -0.050633000 | 2.521010000  | -2.322089000 |
| N | 0.020866000  | -1.222386000 | -1.993564000 |
| C | -0.002232000 | -1.138036000 | -0.601946000 |
| C | 0.000000000  | -2.472734000 | -0.076619000 |
| C | 0.042699000  | -3.326309000 | -1.178182000 |
| C | 0.050633000  | -2.521010000 | -2.322089000 |
| B | 0.000000000  | 0.000000000  | -2.937654000 |
| N | 0.000000000  | 0.000000000  | 0.063055000  |
| F | 1.139471000  | 0.018598000  | -3.750674000 |
| F | -1.139471000 | -0.018598000 | -3.750674000 |
| H | -0.055673000 | 4.405354000  | -1.163173000 |
| H | 0.055673000  | -4.405354000 | -1.163173000 |
| C | -0.044658000 | -2.850339000 | 1.306729000  |

|   |              |              |              |
|---|--------------|--------------|--------------|
| O | 0.097414000  | -4.184002000 | 1.576962000  |
| C | -0.228638000 | -2.168228000 | 2.479153000  |
| C | 0.007940000  | -4.337436000 | 2.918918000  |
| C | -0.192082000 | -3.135494000 | 3.523953000  |
| H | -0.384716000 | -1.105098000 | 2.568819000  |
| H | 0.105597000  | -5.346535000 | 3.288144000  |
| H | -0.303553000 | -2.961111000 | 4.583894000  |
| C | 0.044658000  | 2.850339000  | 1.306729000  |
| O | -0.097414000 | 4.184002000  | 1.576962000  |
| C | 0.228638000  | 2.168228000  | 2.479153000  |
| C | -0.007940000 | 4.337436000  | 2.918918000  |
| C | 0.192082000  | 3.135494000  | 3.523953000  |
| H | 0.384716000  | 1.105098000  | 2.568819000  |
| H | -0.105597000 | 5.346535000  | 3.288144000  |
| H | 0.303553000  | 2.961111000  | 4.583894000  |
| H | -0.072371000 | 2.830804000  | -3.358429000 |
| H | 0.072371000  | -2.830804000 | -3.358429000 |

38

D4 GS CAM-B3LYP/6-31+G(d,p)

|   |              |              |             |
|---|--------------|--------------|-------------|
| N | 0.013569000  | 1.225445000  | 2.306121000 |
| C | -0.010618000 | 1.140093000  | 0.914190000 |
| C | 0.000000000  | 2.470029000  | 0.378373000 |
| C | 0.043824000  | 3.321908000  | 1.475131000 |
| C | 0.047240000  | 2.520982000  | 2.629373000 |
| N | -0.013569000 | -1.225445000 | 2.306121000 |
| C | 0.010618000  | -1.140093000 | 0.914190000 |
| C | 0.000000000  | -2.470029000 | 0.378373000 |
| C | -0.043824000 | -3.321908000 | 1.475131000 |
| C | -0.047240000 | -2.520982000 | 2.629373000 |

|   |              |              |              |
|---|--------------|--------------|--------------|
| B | 0.000000000  | 0.000000000  | 3.252617000  |
| N | 0.000000000  | 0.000000000  | 0.254477000  |
| F | -1.140356000 | 0.010601000  | 4.059868000  |
| F | 1.140356000  | -0.010601000 | 4.059868000  |
| H | 0.043021000  | 4.401850000  | 1.468254000  |
| H | -0.043021000 | -4.401850000 | 1.468254000  |
| C | 0.015415000  | -2.839062000 | -1.037491000 |
| C | -0.605288000 | -4.023446000 | -1.457596000 |
| C | 0.641675000  | -2.060137000 | -2.016831000 |
| N | -0.625278000 | -4.446547000 | -2.719981000 |
| C | 0.621530000  | -2.491865000 | -3.335372000 |
| C | -0.017719000 | -3.689206000 | -3.639444000 |
| H | 1.141978000  | -1.138959000 | -1.743756000 |
| H | 1.101997000  | -1.915790000 | -4.118235000 |
| H | -0.042736000 | -4.057874000 | -4.661252000 |
| H | -1.124542000 | -4.647415000 | -0.734829000 |
| C | -0.015415000 | 2.839062000  | -1.037491000 |
| C | 0.605288000  | 4.023446000  | -1.457596000 |
| C | -0.641675000 | 2.060137000  | -2.016831000 |
| N | 0.625278000  | 4.446547000  | -2.719981000 |
| C | -0.621530000 | 2.491865000  | -3.335372000 |
| C | 0.017719000  | 3.689206000  | -3.639444000 |
| H | 1.124542000  | 4.647415000  | -0.734829000 |
| H | -1.141978000 | 1.138959000  | -1.743756000 |
| H | -1.101997000 | 1.915790000  | -4.118235000 |
| H | 0.042736000  | 4.057874000  | -4.661252000 |
| H | 0.063910000  | 2.837545000  | 3.663817000  |
| H | -0.063910000 | -2.837545000 | 3.663817000  |

D5 GS CAM-B3LYP/6-31+G(d,p)

|   |              |              |              |
|---|--------------|--------------|--------------|
| N | 0.009663000  | 1.226276000  | 2.311716000  |
| C | -0.011728000 | 1.140481000  | 0.919996000  |
| C | 0.000000000  | 2.471013000  | 0.385996000  |
| C | 0.039068000  | 3.322080000  | 1.481115000  |
| C | 0.039237000  | 2.520525000  | 2.636543000  |
| N | -0.009663000 | -1.226276000 | 2.311716000  |
| C | 0.011728000  | -1.140481000 | 0.919996000  |
| C | 0.000000000  | -2.471013000 | 0.385996000  |
| C | -0.039068000 | -3.322080000 | 1.481115000  |
| C | -0.039237000 | -2.520525000 | 2.636543000  |
| B | 0.000000000  | 0.000000000  | 3.259317000  |
| N | 0.000000000  | 0.000000000  | 0.261362000  |
| F | -1.140635000 | 0.007543000  | 4.063882000  |
| F | 1.140635000  | -0.007543000 | 4.063882000  |
| H | 0.039306000  | 4.402029000  | 1.473432000  |
| H | -0.039306000 | -4.402029000 | 1.473432000  |
| C | 0.016425000  | -2.849591000 | -1.030492000 |
| C | -0.583655000 | -4.041289000 | -1.450840000 |
| C | 0.637118000  | -2.064356000 | -2.007171000 |
| C | -0.537530000 | -4.385800000 | -2.795075000 |
| C | 0.627214000  | -2.499169000 | -3.327015000 |
| N | 0.054775000  | -3.637072000 | -3.730871000 |
| H | 1.126414000  | -1.134787000 | -1.746585000 |
| H | -1.002197000 | -5.307029000 | -3.136029000 |
| H | 1.107898000  | -1.901587000 | -4.096955000 |
| H | -1.096522000 | -4.687300000 | -0.747244000 |
| C | -0.016425000 | 2.849591000  | -1.030492000 |
| C | 0.583655000  | 4.041289000  | -1.450840000 |

|   |              |              |              |
|---|--------------|--------------|--------------|
| C | -0.637118000 | 2.064356000  | -2.007171000 |
| C | 0.537530000  | 4.385800000  | -2.795075000 |
| C | -0.627214000 | 2.499169000  | -3.327015000 |
| N | -0.054775000 | 3.637072000  | -3.730871000 |
| H | 1.096522000  | 4.687300000  | -0.747244000 |
| H | -1.126414000 | 1.134787000  | -1.746585000 |
| H | 1.002197000  | 5.307029000  | -3.136029000 |
| H | -1.107898000 | 1.901587000  | -4.096955000 |
| H | 0.053125000  | 2.836643000  | 3.671124000  |
| H | -0.053125000 | -2.836643000 | 3.671124000  |

38

D6 GS CAM-B3LYP/6-31+G(d,p)

|   |              |              |              |
|---|--------------|--------------|--------------|
| N | 0.000000000  | 1.225209000  | 2.282275000  |
| C | -0.025351000 | 1.142472000  | 0.889717000  |
| C | -0.032507000 | 2.477039000  | 0.361524000  |
| C | 0.007133000  | 3.324130000  | 1.459438000  |
| C | 0.020372000  | 2.520016000  | 2.610706000  |
| N | 0.000000000  | -1.225209000 | 2.282275000  |
| C | 0.025351000  | -1.142472000 | 0.889717000  |
| C | 0.032507000  | -2.477039000 | 0.361524000  |
| C | -0.007133000 | -3.324130000 | 1.459438000  |
| C | -0.020372000 | -2.520016000 | 2.610706000  |
| B | 0.000000000  | 0.000000000  | 3.227362000  |
| N | 0.000000000  | 0.000000000  | 0.233599000  |
| F | -1.140360000 | -0.001547000 | 4.035366000  |
| F | 1.140360000  | 0.001547000  | 4.035366000  |
| H | 0.014083000  | 4.402715000  | 1.438789000  |
| H | -0.014083000 | -4.402715000 | 1.438789000  |
| C | 0.072648000  | -2.896096000 | -1.046314000 |

|   |              |              |              |
|---|--------------|--------------|--------------|
| N | -0.288939000 | -4.169528000 | -1.281957000 |
| C | 0.489201000  | -2.040467000 | -2.070995000 |
| C | -0.255988000 | -4.614872000 | -2.535414000 |
| C | 0.517356000  | -2.519408000 | -3.375185000 |
| C | 0.136263000  | -3.832251000 | -3.619746000 |
| H | 0.787837000  | -1.026147000 | -1.842141000 |
| H | -0.557912000 | -5.648334000 | -2.685089000 |
| H | 0.838785000  | -1.874491000 | -4.186480000 |
| H | 0.143616000  | -4.248692000 | -4.620721000 |
| C | -0.072648000 | 2.896096000  | -1.046314000 |
| N | 0.288939000  | 4.169528000  | -1.281957000 |
| C | -0.489201000 | 2.040467000  | -2.070995000 |
| C | 0.255988000  | 4.614872000  | -2.535414000 |
| C | -0.517356000 | 2.519408000  | -3.375185000 |
| C | -0.136263000 | 3.832251000  | -3.619746000 |
| H | -0.787837000 | 1.026147000  | -1.842141000 |
| H | 0.557912000  | 5.648334000  | -2.685089000 |
| H | -0.838785000 | 1.874491000  | -4.186480000 |
| H | -0.143616000 | 4.248692000  | -4.620721000 |
| H | 0.039935000  | 2.831311000  | 3.646742000  |
| H | -0.039935000 | -2.831311000 | 3.646742000  |

20

D7 GS CAM-B3LYP/6-31+G(d,p)

|   |             |              |              |
|---|-------------|--------------|--------------|
| N | 0.000000000 | 1.226503000  | -0.297754000 |
| C | 0.000000000 | 1.139653000  | 1.098027000  |
| C | 0.000000000 | 2.460102000  | 1.623440000  |
| C | 0.000000000 | 3.321902000  | 0.547038000  |
| C | 0.000000000 | 2.521013000  | -0.618177000 |
| N | 0.000000000 | -1.226503000 | -0.297754000 |

|   |              |              |              |
|---|--------------|--------------|--------------|
| C | 0.000000000  | -1.139653000 | 1.098027000  |
| C | 0.000000000  | -2.460102000 | 1.623440000  |
| C | 0.000000000  | -3.321902000 | 0.547038000  |
| C | 0.000000000  | -2.521013000 | -0.618177000 |
| B | 0.000000000  | 0.000000000  | -1.245289000 |
| N | 0.000000000  | 0.000000000  | 1.761804000  |
| F | 1.140879000  | 0.000000000  | -2.050907000 |
| F | -1.140879000 | 0.000000000  | -2.050907000 |
| H | 0.000000000  | 2.700392000  | 2.677147000  |
| H | 0.000000000  | 4.401704000  | 0.562460000  |
| H | 0.000000000  | 2.839776000  | -1.652236000 |
| H | 0.000000000  | -2.700392000 | 2.677147000  |
| H | 0.000000000  | -4.401704000 | 0.562460000  |
| H | 0.000000000  | -2.839776000 | -1.652236000 |

54

A1 GS CAM-B3LYP/6-31G(d)

|   |              |              |              |
|---|--------------|--------------|--------------|
| N | 0.059246000  | 1.242983000  | -0.736344000 |
| C | 0.049123000  | 1.141344000  | 0.652867000  |
| C | 0.027667000  | 2.455674000  | 1.221362000  |
| C | 0.000000000  | 3.322322000  | 0.146534000  |
| C | 0.026689000  | 2.561245000  | -1.046127000 |
| N | -0.059246000 | -1.242983000 | -0.736344000 |
| C | -0.049123000 | -1.141344000 | 0.652867000  |
| C | -0.027667000 | -2.455674000 | 1.221362000  |
| C | 0.000000000  | -3.322322000 | 0.146534000  |
| C | -0.026689000 | -2.561245000 | -1.046127000 |
| B | 0.000000000  | 0.000000000  | -1.671713000 |
| N | 0.000000000  | 0.000000000  | 1.305309000  |
| F | 1.139106000  | -0.086901000 | -2.464366000 |

|   |              |              |              |
|---|--------------|--------------|--------------|
| F | -1.139106000 | 0.086901000  | -2.464366000 |
| C | 0.021249000  | 2.807254000  | 2.644338000  |
| H | 0.019273000  | 4.401907000  | 0.184897000  |
| C | 0.023189000  | 3.118813000  | -2.380890000 |
| C | -0.023189000 | -3.118813000 | -2.380890000 |
| H | -0.019273000 | -4.401907000 | 0.184897000  |
| C | -0.021249000 | -2.807254000 | 2.644338000  |
| C | 0.577061000  | 2.338061000  | 4.954759000  |
| C | 0.581858000  | 1.967116000  | 3.615990000  |
| C | -0.541483000 | 4.393110000  | 4.390930000  |
| C | -0.577061000 | -2.338061000 | 4.954759000  |
| C | 0.017496000  | 3.550182000  | 5.347764000  |
| C | -0.539520000 | 4.025217000  | 3.052653000  |
| C | -0.581858000 | -1.967116000 | 3.615990000  |
| C | -0.017496000 | -3.550182000 | 5.347764000  |
| H | 0.016137000  | 3.836980000  | 6.394609000  |
| H | -1.021500000 | -1.024287000 | 3.316403000  |
| H | -0.016137000 | -3.836980000 | 6.394609000  |
| H | -0.985333000 | 5.337855000  | 4.688344000  |
| H | -1.018468000 | -1.677445000 | 5.694375000  |
| H | -0.995106000 | 4.678905000  | 2.315900000  |
| S | 0.555250000  | -4.750566000 | -2.611804000 |
| C | 0.220869000  | -4.686948000 | -4.294524000 |
| C | -0.306905000 | -3.484299000 | -4.664376000 |
| C | -0.447876000 | -2.586760000 | -3.575196000 |
| C | 0.447876000  | 2.586760000  | -3.575196000 |
| C | 0.306905000  | 3.484299000  | -4.664376000 |
| C | -0.220869000 | 4.686948000  | -4.294524000 |
| S | -0.555250000 | 4.750566000  | -2.611804000 |



|   |              |              |              |
|---|--------------|--------------|--------------|
| H | 0.439075000  | -5.540735000 | -4.921096000 |
| H | -0.591892000 | -3.244294000 | -5.681378000 |
| H | -0.869615000 | -1.595725000 | -3.655294000 |
| H | 0.869615000  | 1.595725000  | -3.655294000 |
| H | 0.591892000  | 3.244294000  | -5.681378000 |
| H | -0.439075000 | 5.540735000  | -4.921096000 |
| C | 0.539520000  | -4.025217000 | 3.052653000  |
| C | 0.541483000  | -4.393110000 | 4.390930000  |
| H | 1.018468000  | 1.677445000  | 5.694375000  |
| H | 1.021500000  | 1.024287000  | 3.316403000  |
| H | 0.995106000  | -4.678905000 | 2.315900000  |
| H | 0.985333000  | -5.337855000 | 4.688344000  |

48

A2 GS CAM-B3LYP/6-31G(d)

|   |              |              |              |
|---|--------------|--------------|--------------|
| N | 0.771651000  | -1.113393000 | 0.114461000  |
| C | 1.221524000  | 0.204740000  | 0.118930000  |
| C | 2.655806000  | 0.205756000  | 0.147810000  |
| C | 3.031507000  | -1.124767000 | 0.122335000  |
| C | 1.862814000  | -1.917784000 | 0.108367000  |
| N | -1.510979000 | -0.147454000 | -0.058916000 |
| C | -0.874559000 | 1.088749000  | -0.040515000 |
| C | -1.860267000 | 2.125084000  | -0.077975000 |
| C | -3.083771000 | 1.475653000  | -0.092609000 |
| C | -2.848236000 | 0.085109000  | -0.082423000 |
| B | -0.735974000 | -1.491957000 | 0.025998000  |
| N | 0.429229000  | 1.252192000  | 0.042673000  |
| F | -1.146912000 | -2.183058000 | 1.160633000  |
| F | -0.939971000 | -2.263525000 | -1.112822000 |
| H | 4.039070000  | -1.513310000 | 0.165487000  |

|   |              |              |              |
|---|--------------|--------------|--------------|
| H | -4.059950000 | 1.933957000  | -0.153107000 |
| C | -1.637953000 | 3.553772000  | -0.101631000 |
| S | -0.079838000 | 4.281421000  | -0.380860000 |
| C | -2.597776000 | 4.525543000  | 0.054209000  |
| C | -0.745302000 | 5.865111000  | -0.288286000 |
| C | -2.088145000 | 5.845317000  | -0.050140000 |
| H | -3.639406000 | 4.298241000  | 0.247012000  |
| H | -0.103753000 | 6.727261000  | -0.408775000 |
| H | -2.694959000 | 6.736906000  | 0.049415000  |
| C | 3.517042000  | 1.365839000  | 0.200177000  |
| S | 5.207242000  | 1.231856000  | -0.206219000 |
| C | 3.213613000  | 2.650719000  | 0.576712000  |
| C | 5.475598000  | 2.897294000  | 0.132783000  |
| C | 4.333661000  | 3.523882000  | 0.536131000  |
| H | 2.219256000  | 2.949296000  | 0.878305000  |
| H | 6.462330000  | 3.321982000  | 0.010673000  |
| H | 4.289332000  | 4.573469000  | 0.800239000  |
| C | 1.849376000  | -3.364261000 | 0.093346000  |
| S | 3.267162000  | -4.214645000 | -0.469316000 |
| C | 0.884007000  | -4.255143000 | 0.498257000  |
| C | 2.541733000  | -5.738474000 | -0.155074000 |
| C | 1.282790000  | -5.608646000 | 0.354885000  |
| H | -0.064573000 | -3.941153000 | 0.908099000  |
| H | 3.083072000  | -6.649076000 | -0.371610000 |
| H | 0.657888000  | -6.450929000 | 0.625295000  |
| C | -3.882863000 | -0.927141000 | -0.092421000 |
| S | -5.490184000 | -0.494461000 | 0.436218000  |
| C | -3.847771000 | -2.240259000 | -0.496436000 |
| C | -6.080019000 | -2.073356000 | 0.108175000  |

|   |              |              |              |
|---|--------------|--------------|--------------|
| C | -5.103226000 | -2.890728000 | -0.380525000 |
| H | -2.955604000 | -2.707104000 | -0.886792000 |
| H | -7.116381000 | -2.313782000 | 0.301193000  |
| H | -5.271412000 | -3.924923000 | -0.654900000 |

48

A3 GS CAM-B3LYP/6-31G(d)

|   |              |              |              |
|---|--------------|--------------|--------------|
| N | 0.045424000  | 1.242195000  | -0.446812000 |
| C | 0.048631000  | 1.137514000  | 0.940916000  |
| C | 0.044513000  | 2.453065000  | 1.501506000  |
| C | 0.000000000  | 3.327143000  | 0.430955000  |
| C | 0.008708000  | 2.563609000  | -0.756650000 |
| N | -0.045424000 | -1.242195000 | -0.446812000 |
| C | -0.048631000 | -1.137514000 | 0.940916000  |
| C | -0.044513000 | -2.453065000 | 1.501506000  |
| C | 0.000000000  | -3.327143000 | 0.430955000  |
| C | -0.008708000 | -2.563609000 | -0.756650000 |
| B | 0.000000000  | 0.000000000  | -1.383040000 |
| N | 0.000000000  | 0.000000000  | 1.601260000  |
| F | 1.139869000  | -0.071538000 | -2.176458000 |
| F | -1.139869000 | 0.071538000  | -2.176458000 |
| H | 0.005722000  | 4.405718000  | 0.481329000  |
| H | -0.005722000 | -4.405718000 | 0.481329000  |
| C | -0.094327000 | -2.788842000 | 2.896479000  |
| O | 0.099772000  | -4.104662000 | 3.210327000  |
| C | -0.334481000 | -2.078523000 | 4.039658000  |
| C | -0.012861000 | -4.218036000 | 4.553338000  |
| C | -0.278621000 | -3.010101000 | 5.115382000  |
| H | -0.543754000 | -1.021663000 | 4.089704000  |
| H | 0.121906000  | -5.210075000 | 4.955539000  |

|   |              |              |              |
|---|--------------|--------------|--------------|
| H | -0.421038000 | -2.806813000 | 6.166421000  |
| C | 0.094327000  | 2.788842000  | 2.896479000  |
| O | -0.099772000 | 4.104662000  | 3.210327000  |
| C | 0.334481000  | 2.078523000  | 4.039658000  |
| C | 0.012861000  | 4.218036000  | 4.553338000  |
| C | 0.278621000  | 3.010101000  | 5.115382000  |
| H | 0.543754000  | 1.021663000  | 4.089704000  |
| H | -0.121906000 | 5.210075000  | 4.955539000  |
| H | 0.421038000  | 2.806813000  | 6.166421000  |
| C | -0.018857000 | 3.117864000  | -2.093099000 |
| C | 0.396638000  | 2.588199000  | -3.291401000 |
| C | 0.232709000  | 3.482487000  | -4.380308000 |
| C | -0.303039000 | 4.680071000  | -4.005910000 |
| S | -0.617182000 | 4.742949000  | -2.319074000 |
| H | 0.828524000  | 1.601866000  | -3.375145000 |
| H | 0.507460000  | 3.243606000  | -5.400396000 |
| H | -0.538325000 | 5.530341000  | -4.631075000 |
| C | 0.018857000  | -3.117864000 | -2.093099000 |
| C | -0.396638000 | -2.588199000 | -3.291401000 |
| C | -0.232709000 | -3.482487000 | -4.380308000 |
| C | 0.303039000  | -4.680071000 | -4.005910000 |
| S | 0.617182000  | -4.742949000 | -2.319074000 |
| H | -0.828524000 | -1.601866000 | -3.375145000 |
| H | -0.507460000 | -3.243606000 | -5.400396000 |
| H | 0.538325000  | -5.530341000 | -4.631075000 |

52

A4 GS CAM-B3LYP/6-31G(d)

|   |             |             |              |
|---|-------------|-------------|--------------|
| N | 0.058331000 | 1.243777000 | -0.729540000 |
| C | 0.046840000 | 1.140286000 | 0.658369000  |

|   |              |              |              |
|---|--------------|--------------|--------------|
| C | 0.025057000  | 2.453147000  | 1.226651000  |
| C | 0.000000000  | 3.323107000  | 0.156389000  |
| C | 0.027052000  | 2.562059000  | -1.038682000 |
| N | -0.058331000 | -1.243777000 | -0.729540000 |
| C | -0.046840000 | -1.140286000 | 0.658369000  |
| C | -0.025057000 | -2.453147000 | 1.226651000  |
| C | 0.000000000  | -3.323107000 | 0.156389000  |
| C | -0.027052000 | -2.562059000 | -1.038682000 |
| B | 0.000000000  | 0.000000000  | -1.666484000 |
| N | 0.000000000  | 0.000000000  | 1.313053000  |
| F | 1.139216000  | -0.086305000 | -2.456824000 |
| F | -1.139216000 | 0.086305000  | -2.456824000 |
| H | 0.020357000  | 4.402620000  | 0.196449000  |
| H | -0.020357000 | -4.402620000 | 0.196449000  |
| C | -0.014075000 | -2.790119000 | 2.650611000  |
| C | 0.574550000  | -3.985889000 | 3.080651000  |
| C | -0.583114000 | -1.969783000 | 3.630136000  |
| N | 0.615638000  | -4.386750000 | 4.348022000  |
| C | -0.540355000 | -2.375484000 | 4.955397000  |
| C | 0.062288000  | -3.588943000 | 5.265012000  |
| H | -1.051003000 | -1.034025000 | 3.350724000  |
| H | -0.975365000 | -1.765375000 | 5.739108000  |
| H | 0.102798000  | -3.937159000 | 6.294263000  |
| H | 1.051467000  | -4.641677000 | 2.355714000  |
| C | 0.014075000  | 2.790119000  | 2.650611000  |
| C | -0.574550000 | 3.985889000  | 3.080651000  |
| C | 0.583114000  | 1.969783000  | 3.630136000  |
| N | -0.615638000 | 4.386750000  | 4.348022000  |
| C | 0.540355000  | 2.375484000  | 4.955397000  |

|   |              |              |              |
|---|--------------|--------------|--------------|
| C | -0.062288000 | 3.588943000  | 5.265012000  |
| H | -1.051467000 | 4.641677000  | 2.355714000  |
| H | 1.051003000  | 1.034025000  | 3.350724000  |
| H | 0.975365000  | 1.765375000  | 5.739108000  |
| H | -0.102798000 | 3.937159000  | 6.294263000  |
| C | -0.025469000 | -3.121290000 | -2.371589000 |
| C | -0.445560000 | -2.587477000 | -3.567336000 |
| C | -0.308368000 | -3.486588000 | -4.654958000 |
| C | 0.211925000  | -4.692115000 | -4.282718000 |
| S | 0.543254000  | -4.756815000 | -2.600069000 |
| H | -0.862434000 | -1.594572000 | -3.649334000 |
| H | -0.590490000 | -3.246201000 | -5.672608000 |
| H | 0.426160000  | -5.547683000 | -4.908248000 |
| C | 0.025469000  | 3.121290000  | -2.371589000 |
| C | 0.445560000  | 2.587477000  | -3.567336000 |
| C | 0.308368000  | 3.486588000  | -4.654958000 |
| C | -0.211925000 | 4.692115000  | -4.282718000 |
| S | -0.543254000 | 4.756815000  | -2.600069000 |
| H | 0.862434000  | 1.594572000  | -3.649334000 |
| H | 0.590490000  | 3.246201000  | -5.672608000 |
| H | -0.426160000 | 5.547683000  | -4.908248000 |

52

A5 GS CAM-B3LYP/6-31G(d)

|   |              |              |              |
|---|--------------|--------------|--------------|
| N | 0.060727000  | 1.244276000  | -0.732881000 |
| C | 0.046666000  | 1.140640000  | 0.654603000  |
| C | 0.022178000  | 2.454289000  | 1.221071000  |
| C | 0.000000000  | 3.323204000  | 0.151855000  |
| C | 0.031796000  | 2.561727000  | -1.044088000 |
| N | -0.060727000 | -1.244276000 | -0.732881000 |

|   |              |              |              |
|---|--------------|--------------|--------------|
| C | -0.046666000 | -1.140640000 | 0.654603000  |
| C | -0.022178000 | -2.454289000 | 1.221071000  |
| C | 0.000000000  | -3.323204000 | 0.151855000  |
| C | -0.031796000 | -2.561727000 | -1.044088000 |
| B | 0.000000000  | 0.000000000  | -1.670254000 |
| N | 0.000000000  | 0.000000000  | 1.308334000  |
| F | 1.139181000  | -0.088678000 | -2.459017000 |
| F | -1.139181000 | 0.088678000  | -2.459017000 |
| H | 0.017150000  | 4.402761000  | 0.192475000  |
| H | -0.017150000 | -4.402761000 | 0.192475000  |
| C | -0.011369000 | -2.801804000 | 2.645508000  |
| C | 0.541878000  | -4.013061000 | 3.071600000  |
| C | -0.558492000 | -1.969456000 | 3.626399000  |
| C | 0.522551000  | -4.328993000 | 4.422193000  |
| C | -0.523450000 | -2.380324000 | 4.952235000  |
| N | 0.002412000  | -3.536517000 | 5.362475000  |
| H | -1.003587000 | -1.019422000 | 3.362200000  |
| H | 0.951580000  | -5.267498000 | 4.765166000  |
| H | -0.946017000 | -1.742822000 | 5.725345000  |
| H | 0.998699000  | -4.696380000 | 2.364547000  |
| C | 0.011369000  | 2.801804000  | 2.645508000  |
| C | -0.541878000 | 4.013061000  | 3.071600000  |
| C | 0.558492000  | 1.969456000  | 3.626399000  |
| C | -0.522551000 | 4.328993000  | 4.422193000  |
| C | 0.523450000  | 2.380324000  | 4.952235000  |
| N | -0.002412000 | 3.536517000  | 5.362475000  |
| H | -0.998699000 | 4.696380000  | 2.364547000  |
| H | 1.003587000  | 1.019422000  | 3.362200000  |
| H | -0.951580000 | 5.267498000  | 4.765166000  |

|   |              |              |              |
|---|--------------|--------------|--------------|
| H | 0.946017000  | 1.742822000  | 5.725345000  |
| C | -0.034286000 | -3.120847000 | -2.376294000 |
| C | -0.452084000 | -2.584570000 | -3.572129000 |
| C | -0.320146000 | -3.484160000 | -4.659526000 |
| C | 0.193876000  | -4.692589000 | -4.287282000 |
| S | 0.525226000  | -4.759620000 | -2.605119000 |
| H | -0.864184000 | -1.589713000 | -3.654194000 |
| H | -0.601381000 | -3.242392000 | -5.677057000 |
| H | 0.403294000  | -5.549225000 | -4.912995000 |
| C | 0.034286000  | 3.120847000  | -2.376294000 |
| C | 0.452084000  | 2.584570000  | -3.572129000 |
| C | 0.320146000  | 3.484160000  | -4.659526000 |
| C | -0.193876000 | 4.692589000  | -4.287282000 |
| S | -0.525226000 | 4.759620000  | -2.605119000 |
| H | 0.864184000  | 1.589713000  | -3.654194000 |
| H | 0.601381000  | 3.242392000  | -5.677057000 |
| H | -0.403294000 | 5.549225000  | -4.912995000 |

52

A6 GS CAM-B3LYP/6-31G(d)

|   |              |              |              |
|---|--------------|--------------|--------------|
| N | 0.057608000  | 1.243110000  | -0.708864000 |
| C | 0.053116000  | 1.142460000  | 0.680075000  |
| C | 0.038777000  | 2.460341000  | 1.239515000  |
| C | 0.000000000  | 3.324884000  | 0.168467000  |
| C | 0.023025000  | 2.560766000  | -1.023352000 |
| N | -0.057608000 | -1.243110000 | -0.708864000 |
| C | -0.053116000 | -1.142460000 | 0.680075000  |
| C | -0.038777000 | -2.460341000 | 1.239515000  |
| C | 0.000000000  | -3.324884000 | 0.168467000  |
| C | -0.023025000 | -2.560766000 | -1.023352000 |



|   |              |              |              |
|---|--------------|--------------|--------------|
| B | 0.000000000  | 0.000000000  | -1.644087000 |
| N | 0.000000000  | 0.000000000  | 1.332101000  |
| F | 1.139340000  | -0.083794000 | -2.435573000 |
| F | -1.139340000 | 0.083794000  | -2.435573000 |
| H | -0.004870000 | 4.402663000  | 0.225714000  |
| H | 0.004870000  | -4.402663000 | 0.225714000  |
| C | -0.061309000 | -2.857974000 | 2.653723000  |
| N | 0.276917000  | -4.135946000 | 2.893863000  |
| C | -0.438972000 | -1.983329000 | 3.675575000  |
| C | 0.259634000  | -4.565470000 | 4.151442000  |
| C | -0.448486000 | -2.447394000 | 4.984455000  |
| C | -0.090368000 | -3.764532000 | 5.235234000  |
| H | -0.720943000 | -0.966238000 | 3.439052000  |
| H | 0.540468000  | -5.604722000 | 4.306439000  |
| H | -0.738205000 | -1.786892000 | 5.795290000  |
| H | -0.084601000 | -4.169764000 | 6.240803000  |
| C | 0.061309000  | 2.857974000  | 2.653723000  |
| N | -0.276917000 | 4.135946000  | 2.893863000  |
| C | 0.438972000  | 1.983329000  | 3.675575000  |
| C | -0.259634000 | 4.565470000  | 4.151442000  |
| C | 0.448486000  | 2.447394000  | 4.984455000  |
| C | 0.090368000  | 3.764532000  | 5.235234000  |
| H | 0.720943000  | 0.966238000  | 3.439052000  |
| H | -0.540468000 | 5.604722000  | 4.306439000  |
| H | 0.738205000  | 1.786892000  | 5.795290000  |
| H | 0.084601000  | 4.169764000  | 6.240803000  |
| C | 0.011527000  | 3.115486000  | -2.358007000 |
| C | 0.420055000  | 2.578718000  | -3.556539000 |
| C | 0.275590000  | 3.476179000  | -4.644539000 |

|   |              |              |              |
|---|--------------|--------------|--------------|
| C | -0.238498000 | 4.683695000  | -4.269928000 |
| S | -0.554117000 | 4.752560000  | -2.584454000 |
| H | 0.834608000  | 1.585044000  | -3.640321000 |
| H | 0.548265000  | 3.233211000  | -5.664172000 |
| H | -0.455905000 | 5.538621000  | -4.895252000 |
| C | -0.011527000 | -3.115486000 | -2.358007000 |
| C | -0.420055000 | -2.578718000 | -3.556539000 |
| C | -0.275590000 | -3.476179000 | -4.644539000 |
| C | 0.238498000  | -4.683695000 | -4.269928000 |
| S | 0.554117000  | -4.752560000 | -2.584454000 |
| H | -0.834608000 | -1.585044000 | -3.640321000 |
| H | -0.548265000 | -3.233211000 | -5.664172000 |
| H | 0.455905000  | -5.538621000 | -4.895252000 |

34

A7 GS CAM-B3LYP/6-31G(d)

|   |              |              |              |
|---|--------------|--------------|--------------|
| N | 0.038687000  | 1.244555000  | 1.060835000  |
| C | 0.010675000  | 1.138850000  | 2.452316000  |
| C | -0.036614000 | 2.442437000  | 3.008235000  |
| C | -0.052441000 | 3.322419000  | 1.959435000  |
| C | -0.001694000 | 2.561617000  | 0.754927000  |
| N | -0.038687000 | -1.244555000 | 1.060835000  |
| C | -0.010675000 | -1.138850000 | 2.452316000  |
| C | 0.036614000  | -2.442437000 | 3.008235000  |
| C | 0.052441000  | -3.322419000 | 1.959435000  |
| C | 0.001694000  | -2.561617000 | 0.754927000  |
| B | 0.000000000  | 0.000000000  | 0.123322000  |
| N | 0.000000000  | 0.000000000  | 3.113936000  |
| F | 1.140595000  | -0.068727000 | -0.667242000 |
| F | -1.140595000 | 0.068727000  | -0.667242000 |

|   |              |              |              |
|---|--------------|--------------|--------------|
| H | -0.069286000 | 4.401730000  | 2.007019000  |
| C | 0.000000000  | 3.125846000  | -0.575649000 |
| C | 0.000000000  | -3.125846000 | -0.575649000 |
| H | 0.069286000  | -4.401730000 | 2.007019000  |
| S | 0.568355000  | -4.762826000 | -0.798626000 |
| C | 0.236988000  | -4.704498000 | -2.481600000 |
| C | -0.283584000 | -3.500463000 | -2.858002000 |
| C | -0.420744000 | -2.597283000 | -1.773698000 |
| C | 0.420744000  | 2.597283000  | -1.773698000 |
| C | 0.283584000  | 3.500463000  | -2.858002000 |
| C | -0.236988000 | 4.704498000  | -2.481600000 |
| S | -0.568355000 | 4.762826000  | -0.798626000 |
| H | 0.450720000  | -5.562532000 | -3.103911000 |
| H | -0.566127000 | -3.263887000 | -3.876454000 |
| H | -0.838446000 | -1.605079000 | -1.859383000 |
| H | 0.838446000  | 1.605079000  | -1.859383000 |
| H | 0.566127000  | 3.263887000  | -3.876454000 |
| H | -0.450720000 | 5.562532000  | -3.103911000 |
| H | -0.054920000 | 2.655901000  | 4.067208000  |
| H | 0.054920000  | -2.655901000 | 4.067208000  |

52

B1 GS CAM-B3LYP/6-31G(d)

|   |              |              |              |
|---|--------------|--------------|--------------|
| N | -0.009854000 | 1.227162000  | -1.663451000 |
| C | 0.010181000  | 1.140645000  | -0.272406000 |
| C | 0.000000000  | 2.469379000  | 0.265252000  |
| C | -0.035322000 | 3.316474000  | -0.833683000 |
| C | -0.036530000 | 2.526702000  | -2.000733000 |
| N | 0.009854000  | -1.227162000 | -1.663451000 |
| C | -0.010181000 | -1.140645000 | -0.272406000 |

|   |              |              |              |
|---|--------------|--------------|--------------|
| C | 0.000000000  | -2.469379000 | 0.265252000  |
| C | 0.035322000  | -3.316474000 | -0.833683000 |
| C | 0.036530000  | -2.526702000 | -2.000733000 |
| B | 0.000000000  | 0.000000000  | -2.610470000 |
| N | 0.000000000  | 0.000000000  | 0.386105000  |
| F | 1.138249000  | 0.008296000  | -3.409506000 |
| F | -1.138249000 | -0.008296000 | -3.409506000 |
| C | 0.008305000  | 2.854079000  | 1.679145000  |
| H | -0.030655000 | 4.396118000  | -0.819207000 |
| H | 0.030655000  | -4.396118000 | -0.819207000 |
| C | -0.008305000 | -2.854079000 | 1.679145000  |
| C | 0.563556000  | 2.425472000  | 3.998490000  |
| C | 0.555603000  | 2.024994000  | 2.668288000  |
| C | -0.514975000 | 4.489687000  | 3.392831000  |
| C | -0.563556000 | -2.425472000 | 3.998490000  |
| C | 0.030461000  | 3.657175000  | 4.366541000  |
| C | -0.525724000 | 4.092236000  | 2.063161000  |
| C | -0.555603000 | -2.024994000 | 2.668288000  |
| C | -0.030461000 | -3.657175000 | 4.366541000  |
| H | 0.039395000  | 3.967320000  | 5.406677000  |
| H | -0.975845000 | -1.067408000 | 2.388089000  |
| H | -0.039395000 | -3.967320000 | 5.406677000  |
| H | -0.938231000 | 5.449786000  | 3.670591000  |
| H | -0.994690000 | -1.772719000 | 4.751072000  |
| H | -0.970724000 | 4.738779000  | 1.313890000  |
| C | 0.525724000  | -4.092236000 | 2.063161000  |
| C | 0.514975000  | -4.489687000 | 3.392831000  |
| H | 0.994690000  | 1.772719000  | 4.751072000  |
| H | 0.975845000  | 1.067408000  | 2.388089000  |

|   |              |              |              |
|---|--------------|--------------|--------------|
| H | 0.970724000  | -4.738779000 | 1.313890000  |
| H | 0.938231000  | -5.449786000 | 3.670591000  |
| C | 0.053648000  | -2.965390000 | -3.429378000 |
| H | -0.814915000 | -2.519865000 | -3.927956000 |
| H | 0.925956000  | -2.507621000 | -3.910047000 |
| C | 0.066625000  | -4.477884000 | -3.620618000 |
| H | -0.820789000 | -4.944068000 | -3.182257000 |
| H | 0.950247000  | -4.931332000 | -3.161700000 |
| H | 0.080770000  | -4.720850000 | -4.685965000 |
| C | -0.053648000 | 2.965390000  | -3.429378000 |
| H | 0.814915000  | 2.519865000  | -3.927956000 |
| H | -0.925956000 | 2.507621000  | -3.910047000 |
| C | -0.066625000 | 4.477884000  | -3.620618000 |
| H | 0.820789000  | 4.944068000  | -3.182257000 |
| H | -0.950247000 | 4.931332000  | -3.161700000 |
| H | -0.080770000 | 4.720850000  | -4.685965000 |

46

B2 GS CAM-B3LYP/6-31G(d)

|   |              |              |              |
|---|--------------|--------------|--------------|
| N | -0.030221000 | 1.226288000  | -1.603412000 |
| C | 0.000000000  | 1.138014000  | -0.214168000 |
| C | -0.007948000 | 2.468077000  | 0.321486000  |
| C | -0.062282000 | 3.318135000  | -0.777591000 |
| C | -0.070770000 | 2.527604000  | -1.940784000 |
| N | 0.030221000  | -1.226288000 | -1.603412000 |
| C | 0.000000000  | -1.138014000 | -0.214168000 |
| C | 0.007948000  | -2.468077000 | 0.321486000  |
| C | 0.062282000  | -3.318135000 | -0.777591000 |
| C | 0.070770000  | -2.527604000 | -1.940784000 |
| B | 0.000000000  | 0.000000000  | -2.551192000 |

|   |              |              |              |
|---|--------------|--------------|--------------|
| N | 0.000000000  | 0.000000000  | 0.448506000  |
| F | 1.137710000  | 0.027787000  | -3.350428000 |
| F | -1.137710000 | -0.027787000 | -3.350428000 |
| H | -0.072899000 | 4.398152000  | -0.761073000 |
| H | 0.072899000  | -4.398152000 | -0.761073000 |
| C | -0.033115000 | -2.825593000 | 1.721335000  |
| S | 0.378254000  | -4.439334000 | 2.237228000  |
| C | -0.392972000 | -2.054630000 | 2.800192000  |
| C | 0.064833000  | -4.051794000 | 3.884265000  |
| C | -0.334783000 | -2.756621000 | 4.033845000  |
| H | -0.700058000 | -1.022515000 | 2.698950000  |
| H | 0.196207000  | -4.802570000 | 4.651057000  |
| H | -0.584662000 | -2.315135000 | 4.990924000  |
| C | 0.033115000  | 2.825593000  | 1.721335000  |
| S | -0.378254000 | 4.439334000  | 2.237228000  |
| C | 0.392972000  | 2.054630000  | 2.800192000  |
| C | -0.064833000 | 4.051794000  | 3.884265000  |
| C | 0.334783000  | 2.756621000  | 4.033845000  |
| H | 0.700058000  | 1.022515000  | 2.698950000  |
| H | -0.196207000 | 4.802570000  | 4.651057000  |
| H | 0.584662000  | 2.315135000  | 4.990924000  |
| C | 0.106562000  | -2.964360000 | -3.369494000 |
| H | -0.762668000 | -2.528178000 | -3.875167000 |
| H | 0.977785000  | -2.495839000 | -3.841584000 |
| C | 0.138519000  | -4.476363000 | -3.562009000 |
| H | -0.747822000 | -4.952991000 | -3.132802000 |
| H | 1.022809000  | -4.920227000 | -3.095079000 |
| H | 0.165690000  | -4.717922000 | -4.627399000 |
| C | -0.106562000 | 2.964360000  | -3.369494000 |

|   |              |             |              |
|---|--------------|-------------|--------------|
| H | 0.762668000  | 2.528178000 | -3.875167000 |
| H | -0.977785000 | 2.495839000 | -3.841584000 |
| C | -0.138519000 | 4.476363000 | -3.562009000 |
| H | 0.747822000  | 4.952991000 | -3.132802000 |
| H | -1.022809000 | 4.920227000 | -3.095079000 |
| H | -0.165690000 | 4.717922000 | -4.627399000 |

46

B3 GS CAM-B3LYP/6-31G(d)

|   |              |              |              |
|---|--------------|--------------|--------------|
| N | -0.006957000 | 1.225970000  | -1.355798000 |
| C | 0.019222000  | 1.136485000  | 0.033590000  |
| C | 0.036080000  | 2.466260000  | 0.562802000  |
| C | 0.000000000  | 3.321263000  | -0.532463000 |
| C | -0.021445000 | 2.529148000  | -1.693740000 |
| N | 0.006957000  | -1.225970000 | -1.355798000 |
| C | -0.019222000 | -1.136485000 | 0.033590000  |
| C | -0.036080000 | -2.466260000 | 0.562802000  |
| C | 0.000000000  | -3.321263000 | -0.532463000 |
| C | 0.021445000  | -2.529148000 | -1.693740000 |
| B | 0.000000000  | 0.000000000  | -2.303429000 |
| N | 0.000000000  | 0.000000000  | 0.700286000  |
| F | 1.137974000  | 0.006627000  | -3.103490000 |
| F | -1.137974000 | -0.006627000 | -3.103490000 |
| H | 0.001434000  | 4.399992000  | -0.505051000 |
| H | -0.001434000 | -4.399992000 | -0.505051000 |
| C | -0.090966000 | -2.833815000 | 1.948749000  |
| O | 0.054557000  | -4.163286000 | 2.231583000  |
| C | -0.290766000 | -2.141379000 | 3.111072000  |
| C | -0.048731000 | -4.302750000 | 3.572732000  |
| C | -0.260826000 | -3.098423000 | 4.164852000  |

|   |              |              |              |
|---|--------------|--------------|--------------|
| H | -0.456445000 | -1.078334000 | 3.187155000  |
| H | 0.050399000  | -5.308259000 | 3.951211000  |
| H | -0.384189000 | -2.913886000 | 5.221761000  |
| C | 0.090966000  | 2.833815000  | 1.948749000  |
| O | -0.054557000 | 4.163286000  | 2.231583000  |
| C | 0.290766000  | 2.141379000  | 3.111072000  |
| C | 0.048731000  | 4.302750000  | 3.572732000  |
| C | 0.260826000  | 3.098423000  | 4.164852000  |
| H | 0.456445000  | 1.078334000  | 3.187155000  |
| H | -0.050399000 | 5.308259000  | 3.951211000  |
| H | 0.384189000  | 2.913886000  | 5.221761000  |
| C | -0.049911000 | 2.964431000  | -3.123144000 |
| H | 0.810668000  | 2.511450000  | -3.628867000 |
| H | -0.930022000 | 2.512151000  | -3.594586000 |
| C | -0.053142000 | 4.476596000  | -3.316890000 |
| H | 0.841796000  | 4.936509000  | -2.887321000 |
| H | -0.928909000 | 4.937382000  | -2.850313000 |
| H | -0.075350000 | 4.718060000  | -4.382448000 |
| C | 0.049911000  | -2.964431000 | -3.123144000 |
| H | -0.810668000 | -2.511450000 | -3.628867000 |
| H | 0.930022000  | -2.512151000 | -3.594586000 |
| C | 0.053142000  | -4.476596000 | -3.316890000 |
| H | -0.841796000 | -4.936509000 | -2.887321000 |
| H | 0.928909000  | -4.937382000 | -2.850313000 |
| H | 0.075350000  | -4.718060000 | -4.382448000 |

50

B4 GS CAM-B3LYP/6-31G(d)

|   |             |             |              |
|---|-------------|-------------|--------------|
| N | 0.019871000 | 1.227853000 | -1.654123000 |
| C | 0.000000000 | 1.139609000 | -0.264242000 |



|   |              |              |              |
|---|--------------|--------------|--------------|
| C | 0.019017000  | 2.466816000  | 0.273406000  |
| C | 0.058093000  | 3.316795000  | -0.821169000 |
| C | 0.054522000  | 2.526852000  | -1.990447000 |
| N | -0.019871000 | -1.227853000 | -1.654123000 |
| C | 0.000000000  | -1.139609000 | -0.264242000 |
| C | -0.019017000 | -2.466816000 | 0.273406000  |
| C | -0.058093000 | -3.316795000 | -0.821169000 |
| C | -0.054522000 | -2.526852000 | -1.990447000 |
| B | 0.000000000  | 0.000000000  | -2.603183000 |
| N | 0.000000000  | 0.000000000  | 0.396077000  |
| F | 1.138342000  | -0.017663000 | -3.399169000 |
| F | -1.138342000 | 0.017663000  | -3.399169000 |
| H | 0.059396000  | 4.396408000  | -0.805468000 |
| H | -0.059396000 | -4.396408000 | -0.805468000 |
| C | -0.016395000 | -2.837731000 | 1.688430000  |
| C | -0.581990000 | -4.053561000 | 2.093885000  |
| C | 0.542574000  | -2.030941000 | 2.685348000  |
| N | -0.610696000 | -4.484206000 | 3.351717000  |
| C | 0.512351000  | -2.467615000 | 4.001068000  |
| C | -0.067516000 | -3.698248000 | 4.285017000  |
| H | 0.993857000  | -1.081358000 | 2.425794000  |
| H | 0.940193000  | -1.868269000 | 4.796961000  |
| H | -0.097274000 | -4.070983000 | 5.306018000  |
| H | -1.050271000 | -4.701031000 | 1.356102000  |
| C | 0.016395000  | 2.837731000  | 1.688430000  |
| C | 0.581990000  | 4.053561000  | 2.093885000  |
| C | -0.542574000 | 2.030941000  | 2.685348000  |
| N | 0.610696000  | 4.484206000  | 3.351717000  |
| C | -0.512351000 | 2.467615000  | 4.001068000  |

|   |              |              |              |
|---|--------------|--------------|--------------|
| C | 0.067516000  | 3.698248000  | 4.285017000  |
| H | 1.050271000  | 4.701031000  | 1.356102000  |
| H | -0.993857000 | 1.081358000  | 2.425794000  |
| H | -0.940193000 | 1.868269000  | 4.796961000  |
| H | 0.097274000  | 4.070983000  | 5.306018000  |
| C | -0.074220000 | -2.967502000 | -3.418057000 |
| H | -0.943802000 | -2.504778000 | -3.898963000 |
| H | 0.797154000  | -2.527629000 | -3.916750000 |
| C | -0.096452000 | -4.480155000 | -3.607175000 |
| H | -0.983025000 | -4.927653000 | -3.148194000 |
| H | 0.788194000  | -4.951260000 | -3.168561000 |
| H | -0.111970000 | -4.723770000 | -4.672275000 |
| C | 0.074220000  | 2.967502000  | -3.418057000 |
| H | 0.943802000  | 2.504778000  | -3.898963000 |
| H | -0.797154000 | 2.527629000  | -3.916750000 |
| C | 0.096452000  | 4.480155000  | -3.607175000 |
| H | 0.983025000  | 4.927653000  | -3.148194000 |
| H | -0.788194000 | 4.951260000  | -3.168561000 |
| H | 0.111970000  | 4.723770000  | -4.672275000 |

50

B5 GS CAM-B3LYP/6-31G(d)

|   |              |              |              |
|---|--------------|--------------|--------------|
| N | 0.007339000  | 1.228801000  | -1.659206000 |
| C | -0.009547000 | 1.139996000  | -0.269722000 |
| C | 0.000000000  | 2.467936000  | 0.266525000  |
| C | 0.028609000  | 3.317353000  | -0.826711000 |
| C | 0.028196000  | 2.526931000  | -1.997157000 |
| N | -0.007339000 | -1.228801000 | -1.659206000 |
| C | 0.009547000  | -1.139996000 | -0.269722000 |
| C | 0.000000000  | -2.467936000 | 0.266525000  |

|   |              |              |              |
|---|--------------|--------------|--------------|
| C | -0.028609000 | -3.317353000 | -0.826711000 |
| C | -0.028196000 | -2.526931000 | -1.997157000 |
| B | 0.000000000  | 0.000000000  | -2.609111000 |
| N | 0.000000000  | 0.000000000  | 0.389339000  |
| F | 1.138683000  | -0.006530000 | -3.402906000 |
| F | -1.138683000 | 0.006530000  | -3.402906000 |
| H | 0.022731000  | 4.396967000  | -0.810611000 |
| H | -0.022731000 | -4.396967000 | -0.810611000 |
| C | 0.006078000  | -2.847997000 | 1.682065000  |
| C | -0.516178000 | -4.081279000 | 2.084711000  |
| C | 0.538020000  | -2.024968000 | 2.679590000  |
| C | -0.483101000 | -4.425986000 | 3.427836000  |
| C | 0.518785000  | -2.465242000 | 3.996211000  |
| N | 0.022535000  | -3.642286000 | 4.383433000  |
| H | 0.960528000  | -1.059573000 | 2.434431000  |
| H | -0.888101000 | -5.381775000 | 3.751866000  |
| H | 0.929943000  | -1.834920000 | 4.781298000  |
| H | -0.959765000 | -4.759914000 | 1.364974000  |
| C | -0.006078000 | 2.847997000  | 1.682065000  |
| C | 0.516178000  | 4.081279000  | 2.084711000  |
| C | -0.538020000 | 2.024968000  | 2.679590000  |
| C | 0.483101000  | 4.425986000  | 3.427836000  |
| C | -0.518785000 | 2.465242000  | 3.996211000  |
| N | -0.022535000 | 3.642286000  | 4.383433000  |
| H | 0.959765000  | 4.759914000  | 1.364974000  |
| H | -0.960528000 | 1.059573000  | 2.434431000  |
| H | 0.888101000  | 5.381775000  | 3.751866000  |
| H | -0.929943000 | 1.834920000  | 4.781298000  |
| C | 0.040843000  | 2.967676000  | -3.424591000 |

|   |              |              |              |
|---|--------------|--------------|--------------|
| H | 0.912230000  | 2.510810000  | -3.907772000 |
| H | -0.829025000 | 2.521808000  | -3.920584000 |
| C | 0.052069000  | 4.480485000  | -3.613499000 |
| H | 0.937053000  | 4.934074000  | -3.157467000 |
| H | -0.834556000 | 4.945463000  | -3.172393000 |
| H | 0.062623000  | 4.723912000  | -4.678653000 |
| C | -0.040843000 | -2.967676000 | -3.424591000 |
| H | -0.912230000 | -2.510810000 | -3.907772000 |
| H | 0.829025000  | -2.521808000 | -3.920584000 |
| C | -0.052069000 | -4.480485000 | -3.613499000 |
| H | -0.937053000 | -4.934074000 | -3.157467000 |
| H | 0.834556000  | -4.945463000 | -3.172393000 |
| H | -0.062623000 | -4.723912000 | -4.678653000 |

50

B6 GS CAM-B3LYP/6-31G(d)

|   |              |              |              |
|---|--------------|--------------|--------------|
| N | 0.000000000  | 1.227725000  | -1.629768000 |
| C | -0.024476000 | 1.141856000  | -0.239027000 |
| C | -0.034267000 | 2.474049000  | 0.289779000  |
| C | 0.002094000  | 3.319319000  | -0.805195000 |
| C | 0.016261000  | 2.526237000  | -1.971365000 |
| N | 0.000000000  | -1.227725000 | -1.629768000 |
| C | 0.024476000  | -1.141856000 | -0.239027000 |
| C | 0.034267000  | -2.474049000 | 0.289779000  |
| C | -0.002094000 | -3.319319000 | -0.805195000 |
| C | -0.016261000 | -2.526237000 | -1.971365000 |
| B | 0.000000000  | 0.000000000  | -2.577292000 |
| N | 0.000000000  | 0.000000000  | 0.418334000  |
| F | 1.138527000  | -0.000148000 | -3.374067000 |
| F | -1.138527000 | 0.000148000  | -3.374067000 |

|   |              |              |              |
|---|--------------|--------------|--------------|
| H | 0.007532000  | 4.397248000  | -0.771828000 |
| H | -0.007532000 | -4.397248000 | -0.771828000 |
| C | 0.073693000  | -2.901659000 | 1.694250000  |
| N | -0.221487000 | -4.195009000 | 1.909866000  |
| C | 0.421822000  | -2.035604000 | 2.734423000  |
| C | -0.188978000 | -4.648226000 | 3.158723000  |
| C | 0.447605000  | -2.524606000 | 4.033788000  |
| C | 0.134591000  | -3.857912000 | 4.258430000  |
| H | 0.670026000  | -1.005221000 | 2.518013000  |
| H | -0.434690000 | -5.699223000 | 3.293248000  |
| H | 0.715014000  | -1.870806000 | 4.857631000  |
| H | 0.143283000  | -4.283111000 | 5.255708000  |
| C | -0.073693000 | 2.901659000  | 1.694250000  |
| N | 0.221487000  | 4.195009000  | 1.909866000  |
| C | -0.421822000 | 2.035604000  | 2.734423000  |
| C | 0.188978000  | 4.648226000  | 3.158723000  |
| C | -0.447605000 | 2.524606000  | 4.033788000  |
| C | -0.134591000 | 3.857912000  | 4.258430000  |
| H | -0.670026000 | 1.005221000  | 2.518013000  |
| H | 0.434690000  | 5.699223000  | 3.293248000  |
| H | -0.715014000 | 1.870806000  | 4.857631000  |
| H | -0.143283000 | 4.283111000  | 5.255708000  |
| C | -0.041217000 | -2.961626000 | -3.400483000 |
| H | -0.921193000 | -2.510661000 | -3.873492000 |
| H | 0.819612000  | -2.507386000 | -3.904680000 |
| C | -0.041935000 | -4.473958000 | -3.593391000 |
| H | -0.918453000 | -4.935653000 | -3.129273000 |
| H | 0.852260000  | -4.932498000 | -3.160971000 |
| H | -0.060716000 | -4.715483000 | -4.658971000 |

|   |              |             |              |
|---|--------------|-------------|--------------|
| C | 0.041217000  | 2.961626000 | -3.400483000 |
| H | 0.921193000  | 2.510661000 | -3.873492000 |
| H | -0.819612000 | 2.507386000 | -3.904680000 |
| C | 0.041935000  | 4.473958000 | -3.593391000 |
| H | 0.918453000  | 4.935653000 | -3.129273000 |
| H | -0.852260000 | 4.932498000 | -3.160971000 |
| H | 0.060716000  | 4.715483000 | -4.658971000 |

32

B7 GS CAM-B3LYP/6-31G(d)

|   |              |              |              |
|---|--------------|--------------|--------------|
| N | 0.000000000  | 1.228224000  | 0.257501000  |
| C | 0.000000000  | 1.137504000  | 1.651845000  |
| C | 0.000000000  | 2.455331000  | 2.177839000  |
| C | 0.000000000  | 3.316540000  | 1.105037000  |
| C | 0.000000000  | 2.526217000  | -0.074941000 |
| N | 0.000000000  | -1.228224000 | 0.257501000  |
| C | 0.000000000  | -1.137504000 | 1.651845000  |
| C | 0.000000000  | -2.455331000 | 2.177839000  |
| C | 0.000000000  | -3.316540000 | 1.105037000  |
| C | 0.000000000  | -2.526217000 | -0.074941000 |
| B | 0.000000000  | 0.000000000  | -0.692320000 |
| N | 0.000000000  | 0.000000000  | 2.318202000  |
| F | 1.138800000  | 0.000000000  | -1.488062000 |
| F | -1.138800000 | 0.000000000  | -1.488062000 |
| H | 0.000000000  | 4.396083000  | 1.128776000  |
| H | 0.000000000  | -4.396083000 | 1.128776000  |
| C | 0.000000000  | -2.972547000 | -1.501292000 |
| H | -0.870636000 | -2.523953000 | -1.993613000 |
| H | 0.870636000  | -2.523953000 | -1.993613000 |
| C | 0.000000000  | -4.486285000 | -1.683911000 |

|   |              |              |              |
|---|--------------|--------------|--------------|
| H | -0.885642000 | -4.943591000 | -1.232844000 |
| H | 0.885642000  | -4.943591000 | -1.232844000 |
| H | 0.000000000  | -4.735168000 | -2.747947000 |
| C | 0.000000000  | 2.972547000  | -1.501292000 |
| H | 0.870636000  | 2.523953000  | -1.993613000 |
| H | -0.870636000 | 2.523953000  | -1.993613000 |
| C | 0.000000000  | 4.486285000  | -1.683911000 |
| H | 0.885642000  | 4.943591000  | -1.232844000 |
| H | -0.885642000 | 4.943591000  | -1.232844000 |
| H | 0.000000000  | 4.735168000  | -2.747947000 |
| H | 0.000000000  | -2.694759000 | 3.231765000  |
| H | 0.000000000  | 2.694759000  | 3.231765000  |

60

? GS CAM-B3LYP/6-31G(d)

|   |              |              |              |
|---|--------------|--------------|--------------|
| N | -0.689593000 | -1.246236000 | 0.151519000  |
| C | 0.700779000  | -1.149215000 | 0.175816000  |
| C | 1.263929000  | -2.462538000 | 0.077679000  |
| C | 0.184268000  | -3.317755000 | -0.039196000 |
| C | -1.003685000 | -2.553456000 | 0.019671000  |
| N | -0.680975000 | 1.242987000  | 0.110834000  |
| C | 0.709564000  | 1.136253000  | 0.100929000  |
| C | 1.279160000  | 2.443048000  | -0.041686000 |
| C | 0.201709000  | 3.304340000  | -0.131538000 |
| C | -0.989614000 | 2.550070000  | -0.034173000 |
| B | -1.609619000 | 0.003744000  | 0.286358000  |
| N | 1.355726000  | -0.008437000 | 0.155580000  |
| F | -2.152615000 | 0.024809000  | 1.579243000  |
| F | -2.602685000 | -0.007801000 | -0.667936000 |
| H | 0.213235000  | -4.395749000 | -0.098808000 |

|   |              |              |              |
|---|--------------|--------------|--------------|
| H | 0.235792000  | 4.376911000  | -0.252498000 |
| C | -2.339891000 | 3.122751000  | -0.098528000 |
| C | -3.405654000 | 2.646301000  | 0.674816000  |
| C | -2.550567000 | 4.228317000  | -0.934775000 |
| C | -4.649190000 | 3.260221000  | 0.602900000  |
| C | -3.797808000 | 4.832452000  | -1.008560000 |
| C | -4.851950000 | 4.350311000  | -0.238114000 |
| H | -3.253306000 | 1.807708000  | 1.340663000  |
| H | -1.736485000 | 4.600516000  | -1.547697000 |
| H | -5.465001000 | 2.885739000  | 1.212971000  |
| H | -3.946660000 | 5.679546000  | -1.670290000 |
| H | -5.827184000 | 4.823686000  | -0.291818000 |
| C | -2.356547000 | -3.118481000 | -0.043058000 |
| C | -2.568055000 | -4.241292000 | -0.855553000 |
| C | -3.424585000 | -2.616895000 | 0.711098000  |
| C | -3.818980000 | -4.838249000 | -0.925545000 |
| C | -4.671790000 | -3.223544000 | 0.643214000  |
| C | -4.875524000 | -4.331062000 | -0.174674000 |
| H | -1.751026000 | -4.632867000 | -1.452394000 |
| H | -3.270816000 | -1.765029000 | 1.359787000  |
| H | -3.968905000 | -5.699348000 | -1.568684000 |
| H | -5.489727000 | -2.829960000 | 1.238208000  |
| H | -5.853679000 | -4.798710000 | -0.225366000 |
| C | 2.685536000  | -2.816062000 | 0.076097000  |
| C | 3.108118000  | -3.986283000 | -0.569325000 |
| C | 3.642703000  | -2.023360000 | 0.724026000  |
| C | 4.446739000  | -4.352779000 | -0.569954000 |
| C | 4.982057000  | -2.392308000 | 0.720080000  |
| C | 5.389317000  | -3.556300000 | 0.075015000  |



|   |             |              |              |
|---|-------------|--------------|--------------|
| H | 2.382280000 | -4.601565000 | -1.091090000 |
| H | 3.331008000 | -1.120079000 | 1.233220000  |
| H | 4.755978000 | -5.259643000 | -1.079820000 |
| H | 5.710417000 | -1.769394000 | 1.229680000  |
| H | 6.436388000 | -3.842250000 | 0.074707000  |
| C | 2.701377000 | 2.799836000  | -0.074285000 |
| C | 3.684892000 | 1.899685000  | -0.506979000 |
| C | 3.096980000 | 4.085758000  | 0.319967000  |
| C | 5.020926000 | 2.279252000  | -0.540884000 |
| C | 4.432547000 | 4.461455000  | 0.284208000  |
| C | 5.400745000 | 3.558789000  | -0.147277000 |
| H | 3.396699000 | 0.903370000  | -0.816662000 |
| H | 2.352195000 | 4.789525000  | 0.676961000  |
| H | 5.769099000 | 1.570579000  | -0.882057000 |
| H | 4.718790000 | 5.459927000  | 0.599132000  |
| H | 6.445568000 | 3.851537000  | -0.175684000 |

54

C2 GS CAM-B3LYP/6-31G(d)

|   |              |              |              |
|---|--------------|--------------|--------------|
| N | 0.301594000  | 1.295213000  | 0.157876000  |
| C | -0.995257000 | 0.785320000  | 0.192927000  |
| C | -1.923059000 | 1.875353000  | 0.098208000  |
| C | -1.147609000 | 3.013515000  | -0.040783000 |
| C | 0.211108000  | 2.636005000  | 0.009307000  |
| N | 1.045995000  | -1.075960000 | 0.150148000  |
| C | -0.309727000 | -1.390404000 | 0.140785000  |
| C | -0.460769000 | -2.805289000 | -0.009647000 |
| C | 0.828299000  | -3.307650000 | -0.105142000 |
| C | 1.733138000  | -2.233040000 | -0.000561000 |
| B | 1.557537000  | 0.384651000  | 0.308133000  |

|   |              |              |              |
|---|--------------|--------------|--------------|
| N | -1.278058000 | -0.499547000 | 0.183291000  |
| F | 2.079306000  | 0.549486000  | 1.599712000  |
| F | 2.502606000  | 0.683850000  | -0.648211000 |
| H | -1.498159000 | 4.032929000  | -0.111947000 |
| H | 1.116529000  | -4.341851000 | -0.219120000 |
| C | -1.692546000 | -3.560714000 | -0.060365000 |
| S | -3.271444000 | -2.828901000 | -0.150726000 |
| C | -1.801063000 | -4.931359000 | -0.059982000 |
| C | -4.038956000 | -4.368414000 | -0.187033000 |
| C | -3.140535000 | -5.392953000 | -0.130678000 |
| H | -0.942391000 | -5.589436000 | -0.001541000 |
| H | -5.116869000 | -4.431701000 | -0.246829000 |
| H | -3.419331000 | -6.439515000 | -0.138260000 |
| C | -3.364639000 | 1.782690000  | 0.140368000  |
| S | -4.355637000 | 3.090712000  | -0.447620000 |
| C | -4.148922000 | 0.770840000  | 0.636704000  |
| C | -5.800246000 | 2.258389000  | -0.022052000 |
| C | -5.539848000 | 1.044026000  | 0.541120000  |
| H | -3.733818000 | -0.132183000 | 1.062642000  |
| H | -6.762567000 | 2.711581000  | -0.215719000 |
| H | -6.312270000 | 0.365503000  | 0.882150000  |
| C | 1.334198000  | 3.576758000  | -0.077540000 |
| C | 2.506011000  | 3.431817000  | 0.675183000  |
| C | 1.197445000  | 4.694502000  | -0.912551000 |
| C | 3.515145000  | 4.381224000  | 0.583605000  |
| C | 2.213226000  | 5.635539000  | -1.006256000 |
| C | 3.376046000  | 5.481769000  | -0.256945000 |
| H | 2.615823000  | 2.586405000  | 1.340974000  |
| H | 0.298265000  | 4.812227000  | -1.508151000 |

|   |             |              |              |
|---|-------------|--------------|--------------|
| H | 4.415591000 | 4.261868000  | 1.177646000  |
| H | 2.096888000 | 6.488689000  | -1.666685000 |
| H | 4.170074000 | 6.218497000  | -0.326220000 |
| C | 3.193765000 | -2.370626000 | -0.057504000 |
| C | 4.059943000 | -1.594699000 | 0.722444000  |
| C | 3.734605000 | -3.359355000 | -0.891396000 |
| C | 5.431442000 | -1.803476000 | 0.659762000  |
| C | 5.106628000 | -3.558340000 | -0.955371000 |
| C | 5.960204000 | -2.780731000 | -0.178184000 |
| H | 3.656406000 | -0.841247000 | 1.385374000  |
| H | 3.075103000 | -3.959087000 | -1.509727000 |
| H | 6.091572000 | -1.200050000 | 1.274650000  |
| H | 5.509392000 | -4.320078000 | -1.615038000 |
| H | 7.033281000 | -2.936929000 | -0.224558000 |

54

? GS CAM-B3LYP/6-31G(d)

|   |              |              |              |
|---|--------------|--------------|--------------|
| N | 0.482344000  | -1.209987000 | 0.125012000  |
| C | 1.496218000  | -0.255708000 | 0.163318000  |
| C | 2.757313000  | -0.923596000 | 0.063761000  |
| C | 2.467003000  | -2.269064000 | -0.082444000 |
| C | 1.065772000  | -2.422024000 | -0.029910000 |
| N | -1.084197000 | 0.721643000  | 0.146868000  |
| C | 0.061323000  | 1.514211000  | 0.123502000  |
| C | -0.331280000 | 2.882156000  | -0.017778000 |
| C | -1.714062000 | 2.878584000  | -0.081945000 |
| C | -2.154042000 | 1.542866000  | 0.021354000  |
| B | -1.018581000 | -0.827925000 | 0.290735000  |
| N | 1.290442000  | 1.044256000  | 0.159182000  |
| F | -1.430926000 | -1.184670000 | 1.583256000  |

|   |              |              |              |
|---|--------------|--------------|--------------|
| F | -1.797020000 | -1.444408000 | -0.663922000 |
| H | 3.177931000  | -3.076473000 | -0.169851000 |
| H | -2.356805000 | 3.740746000  | -0.173106000 |
| C | 0.538578000  | 4.021519000  | -0.096649000 |
| O | -0.068486000 | 5.246291000  | -0.098395000 |
| C | 1.892005000  | 4.184581000  | -0.201566000 |
| C | 0.906507000  | 6.177901000  | -0.199088000 |
| C | 2.128174000  | 5.587342000  | -0.266376000 |
| H | 2.618014000  | 3.388414000  | -0.245967000 |
| H | 0.577488000  | 7.205405000  | -0.208683000 |
| H | 3.080954000  | 6.088105000  | -0.354499000 |
| C | 4.054365000  | -0.311104000 | 0.113401000  |
| O | 5.115850000  | -1.107792000 | -0.212217000 |
| C | 4.507573000  | 0.931115000  | 0.461635000  |
| C | 6.235320000  | -0.361571000 | -0.074601000 |
| C | 5.925597000  | 0.896000000  | 0.335765000  |
| H | 3.893048000  | 1.755588000  | 0.787450000  |
| H | 7.164658000  | -0.859297000 | -0.304178000 |
| H | 6.620963000  | 1.699298000  | 0.529289000  |
| C | 0.370396000  | -3.711271000 | -0.124570000 |
| C | -0.771039000 | -4.015741000 | 0.627218000  |
| C | 0.910629000  | -4.693652000 | -0.966207000 |
| C | -1.356862000 | -5.270851000 | 0.528050000  |
| C | 0.315866000  | -5.943539000 | -1.067177000 |
| C | -0.820622000 | -6.236358000 | -0.318858000 |
| H | -1.185310000 | -3.275763000 | 1.298746000  |
| H | 1.789195000  | -4.465882000 | -1.560631000 |
| H | -2.236996000 | -5.497309000 | 1.121393000  |
| H | 0.739584000  | -6.688751000 | -1.732558000 |

|   |              |              |              |
|---|--------------|--------------|--------------|
| H | -1.285290000 | -7.214368000 | -0.393949000 |
| C | -3.562983000 | 1.131435000  | -0.014816000 |
| C | -4.069568000 | 0.082124000  | 0.761751000  |
| C | -4.444142000 | 1.860724000  | -0.825750000 |
| C | -5.422416000 | -0.228417000 | 0.718150000  |
| C | -5.793795000 | 1.540738000  | -0.870977000 |
| C | -6.287907000 | 0.494501000  | -0.097304000 |
| H | -3.406179000 | -0.477114000 | 1.407458000  |
| H | -4.062560000 | 2.668596000  | -1.441054000 |
| H | -5.803429000 | -1.039497000 | 1.330490000  |
| H | -6.459706000 | 2.108053000  | -1.513119000 |
| H | -7.343704000 | 0.244791000  | -0.128802000 |

58

C4 GS CAM-B3LYP/6-31G(d)

|   |              |              |              |
|---|--------------|--------------|--------------|
| N | -0.685112000 | -1.245851000 | 0.152630000  |
| C | 0.704238000  | -1.149398000 | 0.176750000  |
| C | 1.265037000  | -2.462542000 | 0.082643000  |
| C | 0.188227000  | -3.319459000 | -0.030322000 |
| C | -1.000684000 | -2.552792000 | 0.025182000  |
| N | -0.671999000 | 1.245301000  | 0.110323000  |
| C | 0.717074000  | 1.133867000  | 0.101507000  |
| C | 1.289163000  | 2.437711000  | -0.043766000 |
| C | 0.218184000  | 3.304139000  | -0.136736000 |
| C | -0.977099000 | 2.552543000  | -0.037327000 |
| B | -1.604877000 | 0.006880000  | 0.285370000  |
| N | 1.363181000  | -0.010833000 | 0.156340000  |
| F | -2.146893000 | 0.029774000  | 1.576909000  |
| F | -2.594037000 | -0.003472000 | -0.671195000 |
| H | 0.216573000  | -4.397673000 | -0.085516000 |

|   |              |              |              |
|---|--------------|--------------|--------------|
| H | 0.256368000  | 4.376153000  | -0.261252000 |
| C | 2.712962000  | 2.777225000  | -0.074416000 |
| C | 3.134578000  | 4.044212000  | 0.348939000  |
| C | 3.700298000  | 1.893503000  | -0.522595000 |
| N | 4.399512000  | 4.454466000  | 0.341199000  |
| C | 5.023121000  | 2.309522000  | -0.529570000 |
| C | 5.323666000  | 3.594929000  | -0.095500000 |
| H | 3.428487000  | 0.901338000  | -0.860222000 |
| H | 5.812033000  | 1.650523000  | -0.874634000 |
| H | 6.350783000  | 3.951715000  | -0.098261000 |
| C | 2.687111000  | -2.804400000 | 0.080114000  |
| C | 3.129318000  | -3.956599000 | -0.581935000 |
| C | 3.654015000  | -2.029507000 | 0.728925000  |
| N | 4.396939000  | -4.356516000 | -0.622460000 |
| C | 4.979758000  | -2.433848000 | 0.687248000  |
| C | 5.301798000  | -3.602079000 | 0.006733000  |
| H | 3.364614000  | -1.130256000 | 1.258603000  |
| H | 5.753798000  | -1.858639000 | 1.182855000  |
| H | 6.331372000  | -3.949156000 | -0.034955000 |
| C | -2.352960000 | -3.117506000 | -0.037054000 |
| C | -3.422815000 | -2.610455000 | 0.711033000  |
| C | -2.562290000 | -4.245284000 | -0.843477000 |
| C | -4.670070000 | -3.216680000 | 0.642812000  |
| C | -3.813447000 | -4.841356000 | -0.914018000 |
| C | -4.871842000 | -4.328717000 | -0.169426000 |
| H | -3.270513000 | -1.755713000 | 1.356180000  |
| H | -1.743993000 | -4.641221000 | -1.435642000 |
| H | -5.489506000 | -2.819333000 | 1.233126000  |
| H | -3.962101000 | -5.706084000 | -1.552469000 |

|   |              |              |              |
|---|--------------|--------------|--------------|
| H | -5.850144000 | -4.795956000 | -0.220413000 |
| C | -2.324688000 | 3.129455000  | -0.102726000 |
| C | -3.393307000 | 2.654101000  | 0.667535000  |
| C | -2.530035000 | 4.237391000  | -0.937398000 |
| C | -4.634894000 | 3.271433000  | 0.593807000  |
| C | -3.775566000 | 4.844441000  | -1.013200000 |
| C | -4.832627000 | 4.363375000  | -0.246027000 |
| H | -3.244697000 | 1.814714000  | 1.333167000  |
| H | -1.713858000 | 4.608906000  | -1.547893000 |
| H | -5.453037000 | 2.898340000  | 1.201500000  |
| H | -3.920802000 | 5.693056000  | -1.673686000 |
| H | -5.806465000 | 4.839378000  | -0.301165000 |
| H | 2.414535000  | -4.574919000 | -1.120214000 |
| H | 2.404309000  | 4.754392000  | 0.729984000  |

58

? GS CAM-B3LYP/6-31G(d)

|   |              |              |              |
|---|--------------|--------------|--------------|
| N | -0.688594000 | -1.246580000 | 0.150803000  |
| C | 0.700399000  | -1.149670000 | 0.172572000  |
| C | 1.259572000  | -2.462879000 | 0.071288000  |
| C | 0.183929000  | -3.318804000 | -0.041385000 |
| C | -1.006055000 | -2.552294000 | 0.021266000  |
| N | -0.675601000 | 1.245985000  | 0.111968000  |
| C | 0.713147000  | 1.134634000  | 0.105141000  |
| C | 1.283534000  | 2.440069000  | -0.034133000 |
| C | 0.213606000  | 3.305234000  | -0.127969000 |
| C | -0.982625000 | 2.552262000  | -0.034195000 |
| B | -1.609008000 | 0.006593000  | 0.285815000  |
| N | 1.358180000  | -0.010483000 | 0.156131000  |
| F | -2.148460000 | 0.027879000  | 1.577302000  |

|   |              |              |              |
|---|--------------|--------------|--------------|
| F | -2.596893000 | -0.002325000 | -0.670972000 |
| H | 0.213094000  | -4.396659000 | -0.102979000 |
| H | 0.251843000  | 4.377804000  | -0.247564000 |
| C | 2.707821000  | 2.789785000  | -0.064551000 |
| C | 3.696936000  | 1.897201000  | -0.488462000 |
| C | 3.125385000  | 4.066816000  | 0.323390000  |
| C | 5.020419000  | 2.317063000  | -0.501455000 |
| C | 4.474394000  | 4.385029000  | 0.270005000  |
| N | 5.422123000  | 3.535577000  | -0.133707000 |
| H | 2.412688000  | 4.801662000  | 0.680308000  |
| H | 5.799149000  | 1.632638000  | -0.829910000 |
| H | 4.809693000  | 5.374644000  | 0.571307000  |
| H | 3.440704000  | 0.894352000  | -0.802705000 |
| C | 2.682256000  | -2.814742000 | 0.066735000  |
| C | 3.649988000  | -2.030619000 | 0.701577000  |
| C | 3.120676000  | -3.979806000 | -0.569739000 |
| C | 4.976364000  | -2.439857000 | 0.665486000  |
| C | 4.470330000  | -4.299190000 | -0.543126000 |
| N | 5.398222000  | -3.551940000 | 0.059830000  |
| H | 3.375243000  | -1.119657000 | 1.216839000  |
| H | 2.423900000  | -4.623051000 | -1.095309000 |
| H | 5.739457000  | -1.839703000 | 1.155521000  |
| H | 4.823331000  | -5.201850000 | -1.036129000 |
| C | -2.358065000 | -3.116729000 | -0.039138000 |
| C | -3.426715000 | -2.610168000 | 0.711123000  |
| C | -2.568528000 | -4.243772000 | -0.846474000 |
| C | -4.674092000 | -3.216077000 | 0.643928000  |
| C | -3.819922000 | -4.839224000 | -0.916115000 |
| C | -4.877116000 | -4.327053000 | -0.169453000 |



|   |              |              |              |
|---|--------------|--------------|--------------|
| H | -3.273424000 | -1.756539000 | 1.357453000  |
| H | -1.751370000 | -4.639431000 | -1.440373000 |
| H | -5.492577000 | -2.819401000 | 1.235947000  |
| H | -3.969738000 | -5.703132000 | -1.555352000 |
| H | -5.855567000 | -4.794023000 | -0.219618000 |
| C | -2.329801000 | 3.128827000  | -0.100044000 |
| C | -3.399697000 | 2.651052000  | 0.667080000  |
| C | -2.533441000 | 4.239028000  | -0.932259000 |
| C | -4.641204000 | 3.268199000  | 0.592308000  |
| C | -3.779067000 | 4.845538000  | -1.009313000 |
| C | -4.837449000 | 4.362017000  | -0.245480000 |
| H | -3.252110000 | 1.810666000  | 1.331647000  |
| H | -1.716190000 | 4.612491000  | -1.540127000 |
| H | -5.460419000 | 2.893609000  | 1.197567000  |
| H | -3.923347000 | 5.695692000  | -1.667973000 |
| H | -5.811321000 | 4.837812000  | -0.301442000 |

58

C6 GS CAM-B3LYP/6-31G(d)

|   |              |              |              |
|---|--------------|--------------|--------------|
| N | -0.650010000 | -1.255571000 | 0.137384000  |
| C | 0.738819000  | -1.146866000 | 0.170263000  |
| C | 1.305858000  | -2.456791000 | 0.060666000  |
| C | 0.239158000  | -3.317797000 | -0.082136000 |
| C | -0.955614000 | -2.562627000 | -0.016803000 |
| N | -0.664176000 | 1.234686000  | 0.134848000  |
| C | 0.727326000  | 1.141928000  | 0.116994000  |
| C | 1.274859000  | 2.458602000  | -0.021865000 |
| C | 0.192275000  | 3.308486000  | -0.095160000 |
| C | -0.990440000 | 2.539164000  | 0.003283000  |
| B | -1.581385000 | -0.016022000 | 0.292408000  |

|   |              |              |              |
|---|--------------|--------------|--------------|
| N | 1.382910000  | 0.001311000  | 0.159965000  |
| F | -2.121496000 | -0.022412000 | 1.585608000  |
| F | -2.573397000 | -0.020186000 | -0.661975000 |
| H | 0.296998000  | -4.390700000 | -0.179518000 |
| H | 0.235880000  | 4.382151000  | -0.187921000 |
| C | 2.683711000  | 2.873734000  | -0.084306000 |
| N | 2.892118000  | 4.197135000  | 0.023239000  |
| C | 3.732811000  | 1.969033000  | -0.265180000 |
| C | 4.141605000  | 4.645177000  | -0.035883000 |
| C | 5.032962000  | 2.453811000  | -0.322674000 |
| C | 5.249904000  | 3.819262000  | -0.204178000 |
| H | 3.522660000  | 0.912736000  | -0.363209000 |
| H | 4.269390000  | 5.721373000  | 0.056232000  |
| H | 5.863795000  | 1.769876000  | -0.462916000 |
| H | 6.247614000  | 4.241666000  | -0.243986000 |
| C | 2.722929000  | -2.840639000 | 0.082805000  |
| N | 2.997942000  | -4.058005000 | -0.414531000 |
| C | 3.713529000  | -2.013492000 | 0.618519000  |
| C | 4.261760000  | -4.469750000 | -0.404186000 |
| C | 5.029461000  | -2.457158000 | 0.617448000  |
| C | 5.316874000  | -3.709898000 | 0.093788000  |
| H | 3.448165000  | -1.049234000 | 1.031088000  |
| H | 4.446255000  | -5.459417000 | -0.815812000 |
| H | 5.816542000  | -1.832911000 | 1.027815000  |
| H | 6.328979000  | -4.098032000 | 0.073736000  |
| C | -2.303473000 | -3.135414000 | -0.097386000 |
| C | -3.380877000 | -2.652410000 | 0.655847000  |
| C | -2.500062000 | -4.248394000 | -0.927254000 |
| C | -4.622986000 | -3.266818000 | 0.569204000  |

|   |              |              |              |
|---|--------------|--------------|--------------|
| C | -3.746202000 | -4.852426000 | -1.016362000 |
| C | -4.812261000 | -4.363320000 | -0.266845000 |
| H | -3.238220000 | -1.810160000 | 1.319404000  |
| H | -1.675214000 | -4.626447000 | -1.521968000 |
| H | -5.448272000 | -2.888192000 | 1.163697000  |
| H | -3.884878000 | -5.705231000 | -1.672877000 |
| H | -5.786627000 | -4.836986000 | -0.332233000 |
| C | -2.346159000 | 3.098521000  | -0.040945000 |
| C | -3.404542000 | 2.595797000  | 0.726187000  |
| C | -2.570091000 | 4.220288000  | -0.852257000 |
| C | -4.653844000 | 3.199403000  | 0.671688000  |
| C | -3.823160000 | 4.813647000  | -0.909116000 |
| C | -4.869887000 | 4.304929000  | -0.145574000 |
| H | -3.242055000 | 1.745843000  | 1.374822000  |
| H | -1.761239000 | 4.614027000  | -1.458473000 |
| H | -5.463696000 | 2.804776000  | 1.276929000  |
| H | -3.982356000 | 5.673472000  | -1.551685000 |
| H | -5.849700000 | 4.770102000  | -0.185706000 |

40

C7 GS CAM-B3LYP/6-31G(d)

|   |             |              |              |
|---|-------------|--------------|--------------|
| N | 1.175143000 | 0.106597000  | 1.246005000  |
| C | 2.568330000 | 0.099124000  | 1.140042000  |
| C | 3.121929000 | -0.024827000 | 2.439755000  |
| C | 2.068775000 | -0.114216000 | 3.312064000  |
| C | 0.867255000 | -0.023644000 | 2.552572000  |
| N | 1.175143000 | 0.106597000  | -1.246005000 |
| C | 2.568330000 | 0.099124000  | -1.140042000 |
| C | 3.121929000 | -0.024827000 | -2.439755000 |
| C | 2.068775000 | -0.114216000 | -3.312064000 |

|   |              |              |              |
|---|--------------|--------------|--------------|
| C | 0.867255000  | -0.023644000 | -2.552572000 |
| B | 0.249470000  | 0.267405000  | 0.000000000  |
| N | 3.227755000  | 0.108808000  | 0.000000000  |
| F | -0.282434000 | 1.563588000  | 0.000000000  |
| F | -0.747328000 | -0.681608000 | 0.000000000  |
| H | 2.109020000  | -0.204884000 | 4.387452000  |
| H | 2.109020000  | -0.204884000 | -4.387452000 |
| C | -0.480876000 | -0.070148000 | -3.128652000 |
| C | -1.546586000 | 0.692726000  | -2.634644000 |
| C | -0.691122000 | -0.879084000 | -4.254779000 |
| C | -2.789622000 | 0.636125000  | -3.250763000 |
| C | -1.938063000 | -0.937955000 | -4.860827000 |
| C | -2.992080000 | -0.178840000 | -4.360608000 |
| H | -1.393967000 | 1.340172000  | -1.781821000 |
| H | 0.122845000  | -1.482903000 | -4.641804000 |
| H | -3.605209000 | 1.237950000  | -2.862785000 |
| H | -2.086850000 | -1.578727000 | -5.723853000 |
| H | -3.967016000 | -0.220561000 | -4.835762000 |
| C | -0.480876000 | -0.070148000 | 3.128652000  |
| C | -0.691122000 | -0.879084000 | 4.254779000  |
| C | -1.546586000 | 0.692726000  | 2.634644000  |
| C | -1.938063000 | -0.937955000 | 4.860827000  |
| C | -2.789622000 | 0.636125000  | 3.250763000  |
| C | -2.992080000 | -0.178840000 | 4.360608000  |
| H | 0.122845000  | -1.482903000 | 4.641804000  |
| H | -1.393967000 | 1.340172000  | 1.781821000  |
| H | -2.086850000 | -1.578727000 | 5.723853000  |
| H | -3.605209000 | 1.237950000  | 2.862785000  |
| H | -3.967016000 | -0.220561000 | 4.835762000  |

|                          |              |              |              |
|--------------------------|--------------|--------------|--------------|
| H                        | 4.180660000  | -0.051035000 | 2.654230000  |
| H                        | 4.180660000  | -0.051035000 | -2.654230000 |
| 40                       |              |              |              |
| D1 GS CAM-B3LYP/6-31G(d) |              |              |              |
| N                        | 0.014233000  | 1.224922000  | 2.317648000  |
| C                        | -0.006763000 | 1.141431000  | 0.925849000  |
| C                        | 0.010391000  | 2.472446000  | 0.387661000  |
| C                        | 0.052431000  | 3.320036000  | 1.488287000  |
| C                        | 0.050082000  | 2.518833000  | 2.639830000  |
| N                        | -0.014233000 | -1.224922000 | 2.317648000  |
| C                        | 0.006763000  | -1.141431000 | 0.925849000  |
| C                        | -0.010391000 | -2.472446000 | 0.387661000  |
| C                        | -0.052431000 | -3.320036000 | 1.488287000  |
| C                        | -0.050082000 | -2.518833000 | 2.639830000  |
| B                        | 0.000000000  | 0.000000000  | 3.274909000  |
| N                        | 0.000000000  | 0.000000000  | 0.268971000  |
| F                        | -1.136473000 | 0.010247000  | 4.063098000  |
| F                        | 1.136473000  | -0.010247000 | 4.063098000  |
| C                        | 0.002184000  | 2.855827000  | -1.025911000 |
| H                        | 0.055176000  | 4.399954000  | 1.482192000  |
| H                        | -0.055176000 | -4.399954000 | 1.482192000  |
| C                        | -0.002184000 | -2.855827000 | -1.025911000 |
| C                        | -0.560978000 | 2.429220000  | -3.343201000 |
| C                        | -0.554131000 | 2.029988000  | -2.012748000 |
| C                        | 0.536607000  | 4.485087000  | -2.741376000 |
| C                        | 0.560978000  | -2.429220000 | -3.343201000 |
| C                        | -0.017635000 | 3.655898000  | -3.713030000 |
| C                        | 0.546089000  | 4.089277000  | -1.411388000 |
| C                        | 0.554131000  | -2.029988000 | -2.012748000 |

|   |              |              |              |
|---|--------------|--------------|--------------|
| C | 0.017635000  | -3.655898000 | -3.713030000 |
| H | -0.025670000 | 3.965024000  | -4.753441000 |
| H | 0.983619000  | -1.076827000 | -1.731355000 |
| H | 0.025670000  | -3.965024000 | -4.753441000 |
| H | 0.967571000  | 5.441101000  | -3.021091000 |
| H | 0.999281000  | -1.779780000 | -4.094400000 |
| H | 0.997849000  | 4.732727000  | -0.663536000 |
| C | -0.546089000 | -4.089277000 | -1.411388000 |
| C | -0.536607000 | -4.485087000 | -2.741376000 |
| H | -0.999281000 | 1.779780000  | -4.094400000 |
| H | -0.983619000 | 1.076827000  | -1.731355000 |
| H | -0.997849000 | -4.732727000 | -0.663536000 |
| H | -0.967571000 | -5.441101000 | -3.021091000 |
| H | 0.064752000  | 2.832648000  | 3.675067000  |
| H | -0.064752000 | -2.832648000 | 3.675067000  |

34

D2 GS CAM-B3LYP/6-31G(d)

|   |              |              |             |
|---|--------------|--------------|-------------|
| N | 0.025255000  | 1.224093000  | 2.233063000 |
| C | -0.005145000 | 1.138790000  | 0.843081000 |
| C | 0.000000000  | 2.471407000  | 0.306921000 |
| C | 0.054749000  | 3.322143000  | 1.408191000 |
| C | 0.065120000  | 2.520043000  | 2.555465000 |
| N | -0.025255000 | -1.224093000 | 2.233063000 |
| C | 0.005145000  | -1.138790000 | 0.843081000 |
| C | 0.000000000  | -2.471407000 | 0.306921000 |
| C | -0.054749000 | -3.322143000 | 1.408191000 |
| C | -0.065120000 | -2.520043000 | 2.555465000 |
| B | 0.000000000  | 0.000000000  | 3.190918000 |
| N | 0.000000000  | 0.000000000  | 0.182001000 |

|   |              |              |              |
|---|--------------|--------------|--------------|
| F | -1.136054000 | 0.021013000  | 3.979657000  |
| F | 1.136054000  | -0.021013000 | 3.979657000  |
| H | 0.064846000  | 4.402426000  | 1.400460000  |
| H | -0.064846000 | -4.402426000 | 1.400460000  |
| C | 0.043807000  | -2.828088000 | -1.092098000 |
| S | -0.362620000 | -4.442190000 | -1.610111000 |
| C | 0.404037000  | -2.054546000 | -2.169575000 |
| C | -0.047518000 | -4.051544000 | -3.255379000 |
| C | 0.349597000  | -2.755083000 | -3.403523000 |
| H | 0.709534000  | -1.022029000 | -2.067379000 |
| H | -0.176065000 | -4.801707000 | -4.023270000 |
| H | 0.600158000  | -2.312376000 | -4.359776000 |
| C | -0.043807000 | 2.828088000  | -1.092098000 |
| S | 0.362620000  | 4.442190000  | -1.610111000 |
| C | -0.404037000 | 2.054546000  | -2.169575000 |
| C | 0.047518000  | 4.051544000  | -3.255379000 |
| C | -0.349597000 | 2.755083000  | -3.403523000 |
| H | -0.709534000 | 1.022029000  | -2.067379000 |
| H | 0.176065000  | 4.801707000  | -4.023270000 |
| H | -0.600158000 | 2.312376000  | -4.359776000 |
| H | 0.091227000  | 2.833013000  | 3.590595000  |
| H | -0.091227000 | -2.833013000 | 3.590595000  |

34

D3 GS CAM-B3LYP/6-31G(d)

|   |              |             |              |
|---|--------------|-------------|--------------|
| N | -0.022785000 | 1.223284000 | -1.997076000 |
| C | 0.003986000  | 1.137411000 | -0.606924000 |
| C | 0.000389000  | 2.470049000 | -0.077821000 |
| C | -0.048899000 | 3.324821000 | -1.175625000 |
| C | -0.057845000 | 2.520554000 | -2.320612000 |

|   |              |              |              |
|---|--------------|--------------|--------------|
| N | 0.022785000  | -1.223284000 | -1.997076000 |
| C | -0.003986000 | -1.137411000 | -0.606924000 |
| C | -0.000389000 | -2.470049000 | -0.077821000 |
| C | 0.048899000  | -3.324821000 | -1.175625000 |
| C | 0.057845000  | -2.520554000 | -2.320612000 |
| B | 0.000000000  | 0.000000000  | -2.954717000 |
| N | 0.000000000  | 0.000000000  | 0.058350000  |
| F | 1.135937000  | 0.019403000  | -3.744504000 |
| F | -1.135937000 | -0.019403000 | -3.744504000 |
| H | -0.064728000 | 4.403782000  | -1.156931000 |
| H | 0.064728000  | -4.403782000 | -1.156931000 |
| C | -0.048933000 | -2.839528000 | 1.306683000  |
| O | 0.112891000  | -4.167422000 | 1.587369000  |
| C | -0.255249000 | -2.150724000 | 2.470529000  |
| C | 0.013414000  | -4.309476000 | 2.927905000  |
| C | -0.212237000 | -3.108329000 | 3.522403000  |
| H | -0.433589000 | -1.089897000 | 2.548999000  |
| H | 0.125062000  | -5.314137000 | 3.305162000  |
| H | -0.336208000 | -2.926851000 | 4.579710000  |
| C | 0.048933000  | 2.839528000  | 1.306683000  |
| O | -0.112891000 | 4.167422000  | 1.587369000  |
| C | 0.255249000  | 2.150724000  | 2.470529000  |
| C | -0.013414000 | 4.309476000  | 2.927905000  |
| C | 0.212237000  | 3.108329000  | 3.522403000  |
| H | 0.433589000  | 1.089897000  | 2.548999000  |
| H | -0.125062000 | 5.314137000  | 3.305162000  |
| H | 0.336208000  | 2.926851000  | 4.579710000  |
| H | -0.083520000 | 2.831149000  | -3.356487000 |
| H | 0.083520000  | -2.831149000 | -3.356487000 |



## D4 GS CAM-B3LYP/6-31G(d)

|   |              |              |              |
|---|--------------|--------------|--------------|
| N | 0.012128000  | 1.225990000  | 2.307541000  |
| C | -0.007649000 | 1.140429000  | 0.916757000  |
| C | 0.004952000  | 2.469996000  | 0.378458000  |
| C | 0.041656000  | 3.320866000  | 1.474625000  |
| C | 0.042437000  | 2.519586000  | 2.628417000  |
| N | -0.012128000 | -1.225990000 | 2.307541000  |
| C | 0.007649000  | -1.140429000 | 0.916757000  |
| C | -0.004952000 | -2.469996000 | 0.378458000  |
| C | -0.041656000 | -3.320866000 | 1.474625000  |
| C | -0.042437000 | -2.519586000 | 2.628417000  |
| B | 0.000000000  | 0.000000000  | 3.266976000  |
| N | 0.000000000  | 0.000000000  | 0.258324000  |
| F | -1.136826000 | 0.008699000  | 4.051779000  |
| F | 1.136826000  | -0.008699000 | 4.051779000  |
| H | 0.039281000  | 4.400758000  | 1.467341000  |
| H | -0.039281000 | -4.400758000 | 1.467341000  |
| C | 0.000902000  | -2.839531000 | -1.036433000 |
| C | -0.563272000 | -4.055612000 | -1.443280000 |
| C | 0.560913000  | -2.030884000 | -2.031251000 |
| N | -0.589720000 | -4.484603000 | -2.701469000 |
| C | 0.532991000  | -2.466303000 | -3.347303000 |
| C | -0.045679000 | -3.697152000 | -3.633042000 |
| H | 1.012431000  | -1.081642000 | -1.770697000 |
| H | 0.961799000  | -1.866128000 | -4.141964000 |
| H | -0.073455000 | -4.068984000 | -4.654376000 |
| H | -1.032332000 | -4.704059000 | -0.706875000 |
| C | -0.000902000 | 2.839531000  | -1.036433000 |

|   |              |              |              |
|---|--------------|--------------|--------------|
| C | 0.563272000  | 4.055612000  | -1.443280000 |
| C | -0.560913000 | 2.030884000  | -2.031251000 |
| N | 0.589720000  | 4.484603000  | -2.701469000 |
| C | -0.532991000 | 2.466303000  | -3.347303000 |
| C | 0.045679000  | 3.697152000  | -3.633042000 |
| H | 1.032332000  | 4.704059000  | -0.706875000 |
| H | -1.012431000 | 1.081642000  | -1.770697000 |
| H | -0.961799000 | 1.866128000  | -4.141964000 |
| H | 0.073455000  | 4.068984000  | -4.654376000 |
| H | 0.055269000  | 2.835283000  | 3.663009000  |
| H | -0.055269000 | -2.835283000 | 3.663009000  |

38

D5 GS CAM-B3LYP/6-31G(d)

|   |              |              |             |
|---|--------------|--------------|-------------|
| N | 0.013152000  | 1.226863000  | 2.312748000 |
| C | -0.004289000 | 1.140919000  | 0.922230000 |
| C | 0.013507000  | 2.470990000  | 0.385469000 |
| C | 0.048600000  | 3.320914000  | 1.480114000 |
| C | 0.043611000  | 2.519153000  | 2.635152000 |
| N | -0.013152000 | -1.226863000 | 2.312748000 |
| C | 0.004289000  | -1.140919000 | 0.922230000 |
| C | -0.013507000 | -2.470990000 | 0.385469000 |
| C | -0.048600000 | -3.320914000 | 1.480114000 |
| C | -0.043611000 | -2.519153000 | 2.635152000 |
| B | 0.000000000  | 0.000000000  | 3.273151000 |
| N | 0.000000000  | 0.000000000  | 0.265155000 |
| F | -1.137111000 | 0.010273000  | 4.055533000 |
| F | 1.137111000  | -0.010273000 | 4.055533000 |
| H | 0.050671000  | 4.400826000  | 1.472350000 |
| H | -0.050671000 | -4.400826000 | 1.472350000 |

|   |              |              |              |
|---|--------------|--------------|--------------|
| C | -0.008831000 | -2.849607000 | -1.030316000 |
| C | -0.547119000 | -4.075199000 | -1.434784000 |
| C | 0.536797000  | -2.032156000 | -2.024775000 |
| C | -0.515782000 | -4.418375000 | -2.778387000 |
| C | 0.514604000  | -2.470526000 | -3.342064000 |
| N | 0.002846000  | -3.640069000 | -3.731326000 |
| H | 0.973203000  | -1.073347000 | -1.777930000 |
| H | -0.933122000 | -5.367924000 | -3.104835000 |
| H | 0.936292000  | -1.845180000 | -4.125437000 |
| H | -1.001648000 | -4.748465000 | -0.716849000 |
| C | 0.008831000  | 2.849607000  | -1.030316000 |
| C | 0.547119000  | 4.075199000  | -1.434784000 |
| C | -0.536797000 | 2.032156000  | -2.024775000 |
| C | 0.515782000  | 4.418375000  | -2.778387000 |
| C | -0.514604000 | 2.470526000  | -3.342064000 |
| N | -0.002846000 | 3.640069000  | -3.731326000 |
| H | 1.001648000  | 4.748465000  | -0.716849000 |
| H | -0.973203000 | 1.073347000  | -1.777930000 |
| H | 0.933122000  | 5.367924000  | -3.104835000 |
| H | -0.936292000 | 1.845180000  | -4.125437000 |
| H | 0.055006000  | 2.834470000  | 3.669818000  |
| H | -0.055006000 | -2.834470000 | 3.669818000  |

38

D6 GS CAM-B3LYP/6-31G(d)

|   |              |             |             |
|---|--------------|-------------|-------------|
| N | 0.002519000  | 1.225461000 | 2.278724000 |
| C | -0.022259000 | 1.142725000 | 0.887006000 |
| C | -0.026119000 | 2.477293000 | 0.358119000 |
| C | 0.015247000  | 3.322952000 | 1.454822000 |
| C | 0.026361000  | 2.518117000 | 2.605355000 |

|   |              |              |              |
|---|--------------|--------------|--------------|
| N | -0.002519000 | -1.225461000 | 2.278724000  |
| C | 0.022259000  | -1.142725000 | 0.887006000  |
| C | 0.026119000  | -2.477293000 | 0.358119000  |
| C | -0.015247000 | -3.322952000 | 1.454822000  |
| C | -0.026361000 | -2.518117000 | 2.605355000  |
| B | 0.000000000  | 0.000000000  | 3.236681000  |
| N | 0.000000000  | 0.000000000  | 0.231509000  |
| F | -1.136798000 | -0.000031000 | 4.022418000  |
| F | 1.136798000  | 0.000031000  | 4.022418000  |
| H | 0.026436000  | 4.401207000  | 1.429937000  |
| H | -0.026436000 | -4.401207000 | 1.429937000  |
| C | 0.063841000  | -2.905132000 | -1.046102000 |
| N | -0.239554000 | -4.196754000 | -1.259772000 |
| C | 0.417912000  | -2.041817000 | -2.086140000 |
| C | -0.209705000 | -4.651394000 | -2.507911000 |
| C | 0.440985000  | -2.532375000 | -3.385164000 |
| C | 0.119390000  | -3.863692000 | -3.608208000 |
| H | 0.673410000  | -1.012785000 | -1.871619000 |
| H | -0.462102000 | -5.700814000 | -2.641644000 |
| H | 0.712944000  | -1.881267000 | -4.209560000 |
| H | 0.125683000  | -4.289889000 | -4.605049000 |
| C | -0.063841000 | 2.905132000  | -1.046102000 |
| N | 0.239554000  | 4.196754000  | -1.259772000 |
| C | -0.417912000 | 2.041817000  | -2.086140000 |
| C | 0.209705000  | 4.651394000  | -2.507911000 |
| C | -0.440985000 | 2.532375000  | -3.385164000 |
| C | -0.119390000 | 3.863692000  | -3.608208000 |
| H | -0.673410000 | 1.012785000  | -1.871619000 |
| H | 0.462102000  | 5.700814000  | -2.641644000 |

|   |              |              |              |
|---|--------------|--------------|--------------|
| H | -0.712944000 | 1.881267000  | -4.209560000 |
| H | -0.125683000 | 4.289889000  | -4.605049000 |
| H | 0.047230000  | 2.827760000  | 3.641690000  |
| H | -0.047230000 | -2.827760000 | 3.641690000  |

20

D7 GS CAM-B3LYP/6-31G(d)

|   |              |              |              |
|---|--------------|--------------|--------------|
| N | 0.000000000  | 1.226775000  | -0.299725000 |
| C | 0.000000000  | 1.138624000  | 1.095436000  |
| C | 0.000000000  | 2.458437000  | 1.622128000  |
| C | 0.000000000  | 3.320377000  | 0.548299000  |
| C | 0.000000000  | 2.519280000  | -0.616813000 |
| N | 0.000000000  | -1.226775000 | -0.299725000 |
| C | 0.000000000  | -1.138624000 | 1.095436000  |
| C | 0.000000000  | -2.458437000 | 1.622128000  |
| C | 0.000000000  | -3.320377000 | 0.548299000  |
| C | 0.000000000  | -2.519280000 | -0.616813000 |
| B | 0.000000000  | 0.000000000  | -1.259937000 |
| N | 0.000000000  | 0.000000000  | 1.759528000  |
| F | 1.137348000  | 0.000000000  | -2.043805000 |
| F | -1.137348000 | 0.000000000  | -2.043805000 |
| H | 0.000000000  | 2.696868000  | 2.676126000  |
| H | 0.000000000  | 4.400235000  | 0.564141000  |
| H | 0.000000000  | 2.837940000  | -1.650763000 |
| H | 0.000000000  | -2.696868000 | 2.676126000  |
| H | 0.000000000  | -4.400235000 | 0.564141000  |
| H | 0.000000000  | -2.837940000 | -1.650763000 |

54

A1 ES CAM-B3LYP/6-31G(d)

|   |             |             |              |
|---|-------------|-------------|--------------|
| N | 0.096982745 | 1.233816476 | -0.719105700 |
|---|-------------|-------------|--------------|

|   |              |              |              |
|---|--------------|--------------|--------------|
| C | 0.044658353  | 1.142765588  | 0.651955467  |
| C | 0.000469275  | 2.474426858  | 1.221395982  |
| C | 0.000000000  | 3.332423165  | 0.139847135  |
| C | 0.064892766  | 2.575049213  | -1.050539878 |
| N | -0.096982745 | -1.233816476 | -0.719105700 |
| C | -0.044658353 | -1.142765588 | 0.651955467  |
| C | -0.000469275 | -2.474426858 | 1.221395982  |
| C | 0.000000000  | -3.332423165 | 0.139847135  |
| C | -0.064892766 | -2.575049213 | -1.050539878 |
| B | 0.000000000  | 0.000000000  | -1.649282266 |
| N | 0.000000000  | 0.000000000  | 1.330695109  |
| F | 1.133247060  | -0.123915830 | -2.452901758 |
| F | -1.133247060 | 0.123915830  | -2.452901758 |
| C | -0.045729177 | 2.828111468  | 2.635889886  |
| H | 0.012234320  | 4.412571278  | 0.175304487  |
| C | 0.100736466  | 3.113410407  | -2.370380657 |
| C | -0.100736466 | -3.113410407 | -2.370380657 |
| H | -0.012234320 | -4.412571278 | 0.175304487  |
| C | 0.045729177  | -2.828111468 | 2.635889886  |
| C | 0.352278775  | 2.328078153  | 4.976935073  |
| C | 0.389280574  | 1.948810151  | 3.641352488  |
| C | -0.550766432 | 4.469439766  | 4.354730151  |
| C | -0.352278775 | -2.328078153 | 4.976935073  |
| C | -0.116293728 | 3.586631872  | 5.341738305  |
| C | -0.516721458 | 4.095492318  | 3.020342010  |
| C | -0.389280574 | -1.948810151 | 3.641352488  |
| C | 0.116293728  | -3.586631872 | 5.341738305  |
| H | -0.145286565 | 3.878518756  | 6.386769814  |
| H | -0.758266743 | -0.969581257 | 3.366143048  |

|   |              |              |              |
|---|--------------|--------------|--------------|
| H | 0.145286565  | -3.878518756 | 6.386769814  |
| H | -0.924201885 | 5.451401030  | 4.627902512  |
| H | -0.696779289 | -1.634588432 | 5.737989775  |
| H | -0.878023899 | 4.784962224  | 2.264353174  |
| S | 0.321782282  | -4.799895781 | -2.613587398 |
| C | 0.021405387  | -4.686953290 | -4.297469596 |
| C | -0.380253712 | -3.430799491 | -4.666573240 |
| C | -0.450888627 | -2.533572644 | -3.580578878 |
| C | 0.450888627  | 2.533572644  | -3.580578878 |
| C | 0.380253712  | 3.430799491  | -4.666573240 |
| C | -0.021405387 | 4.686953290  | -4.297469596 |
| S | -0.321782282 | 4.799895781  | -2.613587398 |
| H | 0.161164824  | -5.552515372 | -4.930729390 |
| H | -0.624385883 | -3.160575409 | -5.686713293 |
| H | -0.781958050 | -1.509006235 | -3.659858885 |
| H | 0.781958050  | 1.509006235  | -3.659858885 |
| H | 0.624385883  | 3.160575409  | -5.686713293 |
| H | -0.161164824 | 5.552515372  | -4.930729390 |
| C | 0.516721458  | -4.095492318 | 3.020342010  |
| C | 0.550766432  | -4.469439766 | 4.354730151  |
| H | 0.696779289  | 1.634588432  | 5.737989775  |
| H | 0.758266743  | 0.969581257  | 3.366143048  |
| H | 0.878023899  | -4.784962224 | 2.264353174  |
| H | 0.924201885  | -5.451401030 | 4.627902512  |

48

A2 ES CAM-B3LYP/6-31G(d)

|   |             |              |             |
|---|-------------|--------------|-------------|
| N | 0.821219044 | -1.045069064 | 0.127054145 |
| C | 1.212070196 | 0.268833377  | 0.084761094 |
| C | 2.662110867 | 0.326482074  | 0.067740934 |

|   |              |              |              |
|---|--------------|--------------|--------------|
| C | 3.087759202  | -0.993351476 | 0.066908892  |
| C | 1.964283352  | -1.830751792 | 0.108803952  |
| N | -1.487849671 | -0.195086641 | -0.089274003 |
| C | -0.927621592 | 1.053745687  | -0.032784629 |
| C | -1.982095988 | 2.046830855  | -0.032374686 |
| C | -3.169509255 | 1.328664381  | -0.061320744 |
| C | -2.867042292 | -0.039385293 | -0.097245349 |
| B | -0.656770430 | -1.494248932 | 0.023276322  |
| N | 0.377795071  | 1.306741573  | 0.031067207  |
| F | -1.058250621 | -2.196234229 | 1.159183143  |
| F | -0.808287905 | -2.297801573 | -1.105989923 |
| H | 4.112636682  | -1.337171624 | 0.085165117  |
| H | -4.168552974 | 1.738593008  | -0.094099664 |
| C | -1.833455576 | 3.472035284  | -0.019112144 |
| S | -0.290115531 | 4.285399724  | -0.100206074 |
| C | -2.855288043 | 4.401773718  | 0.038152254  |
| C | -1.040178302 | 5.830841067  | -0.055063591 |
| C | -2.402633290 | 5.740311805  | 0.018840911  |
| H | -3.900541541 | 4.122986262  | 0.094707543  |
| H | -0.434277089 | 6.726181561  | -0.081910227 |
| H | -3.059516652 | 6.600694373  | 0.059127401  |
| C | 3.468793973  | 1.510993386  | 0.062452015  |
| S | 5.197418038  | 1.404215228  | -0.183947563 |
| C | 3.095158142  | 2.825400885  | 0.253304094  |
| C | 5.379457742  | 3.108658311  | -0.026062401 |
| C | 4.184895470  | 3.729580628  | 0.202090735  |
| H | 2.070012512  | 3.111950730  | 0.433902034  |
| H | 6.358802002  | 3.558423036  | -0.113992834 |
| H | 4.085502399  | 4.800532826  | 0.331984779  |



|   |              |              |              |
|---|--------------|--------------|--------------|
| C | 1.996504156  | -3.261178720 | 0.132769957  |
| S | 3.477473581  | -4.081735128 | -0.323916086 |
| C | 1.035750877  | -4.186229622 | 0.500895737  |
| C | 2.784521350  | -5.619574353 | -0.011859330 |
| C | 1.489407135  | -5.521532838 | 0.417399234  |
| H | 0.055908494  | -3.899139036 | 0.851667522  |
| H | 3.367576791  | -6.516913073 | -0.167971831 |
| H | 0.880185715  | -6.380139487 | 0.672277625  |
| C | -3.826885625 | -1.100399213 | -0.132303524 |
| S | -5.493962650 | -0.746864672 | 0.281218004  |
| C | -3.696806422 | -2.43325624  | -0.479569849 |
| C | -5.968488219 | -2.367482940 | -0.020398010 |
| C | -4.915083153 | -3.145809877 | -0.414795450 |
| H | -2.760076853 | -2.861665375 | -0.802933409 |
| H | -6.999996550 | -2.662768010 | 0.115083529  |
| H | -5.009878473 | -4.197119793 | -0.657812724 |

48

A3 ES CAM-B3LYP/6-31G(d)

|   |              |              |              |
|---|--------------|--------------|--------------|
| N | 0.074092093  | 1.234549635  | -0.430180830 |
| C | 0.043922874  | 1.137383596  | 0.936465440  |
| C | 0.023501738  | 2.467943643  | 1.498045556  |
| C | 0.000000000  | 3.340256359  | 0.421683809  |
| C | 0.038223621  | 2.583432095  | -0.759566370 |
| N | -0.074092093 | -1.234549635 | -0.430180830 |
| C | -0.043922874 | -1.137383596 | 0.936465440  |
| C | -0.023501738 | -2.467943643 | 1.498045556  |
| C | 0.000000000  | -3.340256359 | 0.421683809  |
| C | -0.038223621 | -2.583432095 | -0.759566370 |
| B | 0.000000000  | 0.000000000  | -1.363014244 |

|   |              |              |              |
|---|--------------|--------------|--------------|
| N | 0.000000000  | 0.000000000  | 1.627028150  |
| F | 1.136043714  | -0.100119591 | -2.164799926 |
| F | -1.136043714 | 0.100119591  | -2.164799926 |
| H | 0.001182532  | 4.419182834  | 0.474154537  |
| H | -0.001182532 | -4.419182834 | 0.474154537  |
| C | -0.047852437 | -2.783764827 | 2.886684336  |
| O | 0.110693165  | -4.101076361 | 3.219682619  |
| C | -0.230703645 | -2.046210960 | 4.032138287  |
| C | 0.031627906  | -4.188443726 | 4.567247131  |
| C | -0.177520124 | -2.961457224 | 5.116912250  |
| H | -0.408021982 | -0.983727107 | 4.066595637  |
| H | 0.144995259  | -5.177601562 | 4.983308891  |
| H | -0.282955774 | -2.738971815 | 6.168556114  |
| C | 0.047852437  | 2.783764827  | 2.886684336  |
| O | -0.110693165 | 4.101076361  | 3.219682619  |
| C | 0.230703645  | 2.046210960  | 4.032138287  |
| C | -0.031627906 | 4.188443726  | 4.567247131  |
| C | 0.177520124  | 2.961457224  | 5.116912250  |
| H | 0.408021982  | 0.983727107  | 4.066595637  |
| H | -0.144995259 | 5.177601562  | 4.983308891  |
| H | 0.282955774  | 2.738971815  | 6.168556114  |
| C | 0.041516694  | 3.116790278  | -2.087811119 |
| C | 0.399004411  | 2.545130209  | -3.295680404 |
| C | 0.292797000  | 3.437861975  | -4.385964653 |
| C | -0.142935295 | 4.680910499  | -4.017882035 |
| S | -0.433641703 | 4.787077785  | -2.330164493 |
| H | 0.759218812  | 1.530481873  | -3.375457341 |
| H | 0.536677146  | 3.170736766  | -5.407025231 |
| H | -0.314765798 | 5.540528290  | -4.651192725 |

|   |              |              |              |
|---|--------------|--------------|--------------|
| C | -0.041516694 | -3.116790278 | -2.087811119 |
| C | -0.399004411 | -2.545130209 | -3.295680404 |
| C | -0.292797000 | -3.437861975 | -4.385964653 |
| C | 0.142935295  | -4.680910499 | -4.017882035 |
| S | 0.433641703  | -4.787077785 | -2.330164493 |
| H | -0.759218812 | -1.530481873 | -3.375457341 |
| H | -0.536677146 | -3.170736766 | -5.407025231 |
| H | 0.314765798  | -5.540528290 | -4.651192725 |

52

A4 ES CAM-B3LYP/6-31G(d)

|   |              |              |              |
|---|--------------|--------------|--------------|
| N | 0.092549663  | 1.234358444  | -0.713456447 |
| C | 0.042634592  | 1.141533721  | 0.657514892  |
| C | 0.000880539  | 2.470532283  | 1.227000181  |
| C | 0.000000000  | 3.332411857  | 0.150448987  |
| C | 0.061396922  | 2.574956337  | -1.043404420 |
| N | -0.092549663 | -1.234358444 | -0.713456447 |
| C | -0.042634592 | -1.141533721 | 0.657514892  |
| C | -0.000880539 | -2.470532283 | 1.227000181  |
| C | 0.000000000  | -3.332411857 | 0.150448987  |
| C | -0.061396922 | -2.574956337 | -1.043404420 |
| B | 0.000000000  | 0.000000000  | -1.645032909 |
| N | 0.000000000  | 0.000000000  | 1.338441692  |
| F | 1.133520840  | -0.119503932 | -2.447187173 |
| F | -1.133520840 | 0.119503932  | -2.447187173 |
| H | 0.013596368  | 4.412496436  | 0.188392701  |
| H | -0.013596368 | -4.412496436 | 0.188392701  |
| C | 0.044548640  | -2.810597199 | 2.643124009  |
| C | 0.549459311  | -4.056445885 | 3.049323973  |
| C | -0.410415506 | -1.953750402 | 3.654210897  |

|   |              |              |              |
|---|--------------|--------------|--------------|
| N | 0.609929290  | -4.467790596 | 4.311021317  |
| C | -0.346001371 | -2.372273466 | 4.974428259  |
| C | 0.164835879  | -3.633492703 | 5.255746378  |
| H | -0.809004337 | -0.980309485 | 3.398822823  |
| H | -0.694723689 | -1.732438808 | 5.777674999  |
| H | 0.221314220  | -3.991174168 | 6.280969872  |
| H | 0.940168559  | -4.746425092 | 2.304759339  |
| C | -0.044548640 | 2.810597199  | 2.643124009  |
| C | -0.549459311 | 4.056445885  | 3.049323973  |
| C | 0.410415506  | 1.953750402  | 3.654210897  |
| N | -0.609929290 | 4.467790596  | 4.311021317  |
| C | 0.346001371  | 2.372273466  | 4.974428259  |
| C | -0.164835879 | 3.633492703  | 5.255746378  |
| H | -0.940168559 | 4.746425092  | 2.304759339  |
| H | 0.809004337  | 0.980309485  | 3.398822823  |
| H | 0.694723689  | 1.732438808  | 5.777674999  |
| H | -0.221314220 | 3.991174168  | 6.280969872  |
| C | -0.095839471 | -3.115916390 | -2.360594413 |
| C | -0.436930458 | -2.535184899 | -3.574267265 |
| C | -0.367004751 | -3.434120639 | -4.657411145 |
| C | 0.025131520  | -4.692744569 | -4.283423580 |
| S | 0.316409142  | -4.805915162 | -2.599116311 |
| H | -0.762236689 | -1.509075320 | -3.656969345 |
| H | -0.604596342 | -3.164789650 | -5.679254805 |
| H | 0.162434255  | -5.560025138 | -4.914948361 |
| C | 0.095839471  | 3.115916390  | -2.360594413 |
| C | 0.436930458  | 2.535184899  | -3.574267265 |
| C | 0.367004751  | 3.434120639  | -4.657411145 |
| C | -0.025131520 | 4.692744569  | -4.283423580 |

|   |              |             |              |
|---|--------------|-------------|--------------|
| S | -0.316409142 | 4.805915162 | -2.599116311 |
| H | 0.762236689  | 1.509075320 | -3.656969345 |
| H | 0.604596342  | 3.164789650 | -5.679254805 |
| H | -0.162434255 | 5.560025138 | -4.914948361 |

52

A5 ES CAM-B3LYP/6-31G(d)

|   |              |              |              |
|---|--------------|--------------|--------------|
| N | 0.091276640  | 1.234497839  | -0.717591613 |
| C | 0.043696639  | 1.141824245  | 0.654265644  |
| C | 0.003453946  | 2.471794783  | 1.221902093  |
| C | 0.000000000  | 3.331944551  | 0.145337109  |
| C | 0.061056423  | 2.573261356  | -1.049233038 |
| N | -0.091276640 | -1.234497839 | -0.717591613 |
| C | -0.043696639 | -1.141824245 | 0.654265644  |
| C | -0.003453946 | -2.471794783 | 1.221902093  |
| C | 0.000000000  | -3.331944551 | 0.145337109  |
| C | -0.061056423 | -2.573261356 | -1.049233038 |
| B | 0.000000000  | 0.000000000  | -1.649414671 |
| N | 0.000000000  | 0.000000000  | 1.333249807  |
| F | 1.133585955  | -0.117985581 | -2.450770148 |
| F | -1.133585955 | 0.117985581  | -2.450770148 |
| H | 0.010087884  | 4.412084292  | 0.182816608  |
| H | -0.010087884 | -4.412084292 | 0.182816608  |
| C | 0.030150444  | -2.825900719 | 2.636982758  |
| C | 0.475984831  | -4.091975200 | 3.041608897  |
| C | -0.391126021 | -1.954018325 | 3.649252300  |
| C | 0.479056708  | -4.415206580 | 4.388822343  |
| C | -0.344919535 | -2.378915624 | 4.969869112  |
| N | 0.079334255  | -3.584183977 | 5.356376407  |
| H | -0.751520770 | -0.963223510 | 3.408645374  |

|   |              |              |              |
|---|--------------|--------------|--------------|
| H | 0.826443008  | -5.394995603 | 4.708630385  |
| H | -0.671822475 | -1.708080584 | 5.761375176  |
| H | 0.834645970  | -4.814867333 | 2.317581256  |
| C | -0.030150444 | 2.825900719  | 2.636982758  |
| C | -0.475984831 | 4.091975200  | 3.041608897  |
| C | 0.391126021  | 1.954018325  | 3.649252300  |
| C | -0.479056708 | 4.415206580  | 4.388822343  |
| C | 0.344919535  | 2.378915624  | 4.969869112  |
| N | -0.079334255 | 3.584183977  | 5.356376407  |
| H | -0.834645970 | 4.814867333  | 2.317581256  |
| H | 0.751520770  | 0.963223510  | 3.408645374  |
| H | -0.826443008 | 5.394995603  | 4.708630385  |
| H | 0.671822475  | 1.708080584  | 5.761375176  |
| C | -0.093938252 | -3.114557807 | -2.365548380 |
| C | -0.429156350 | -2.532279621 | -3.580851272 |
| C | -0.359116544 | -3.431182383 | -4.663047581 |
| C | 0.027429627  | -4.691528086 | -4.287014112 |
| S | 0.312317420  | -4.806391490 | -2.602606161 |
| H | -0.750986613 | -1.505204070 | -3.664783726 |
| H | -0.592377989 | -3.161571829 | -5.685755483 |
| H | 0.163824409  | -5.559179513 | -4.918286141 |
| C | 0.093938252  | 3.114557807  | -2.365548380 |
| C | 0.429156350  | 2.532279621  | -3.580851272 |
| C | 0.359116544  | 3.431182383  | -4.663047581 |
| C | -0.027429627 | 4.691528086  | -4.287014112 |
| S | -0.312317420 | 4.806391490  | -2.602606161 |
| H | 0.750986613  | 1.505204070  | -3.664783726 |
| H | 0.592377989  | 3.161571829  | -5.685755483 |
| H | -0.163824409 | 5.559179513  | -4.918286141 |

## A6 ES CAM-B3LYP/6-31G(d)

|   |              |              |              |
|---|--------------|--------------|--------------|
| N | 0.082652034  | 1.233786519  | -0.694468361 |
| C | 0.048311187  | 1.143104510  | 0.678650613  |
| C | 0.023045958  | 2.476461565  | 1.239344002  |
| C | -0.000004491 | 3.334241249  | 0.162659053  |
| C | 0.047870940  | 2.573558976  | -1.028539371 |
| N | -0.082652034 | -1.233786519 | -0.694468361 |
| C | -0.048311187 | -1.143104510 | 0.678650613  |
| C | -0.023045958 | -2.476461565 | 1.239344002  |
| C | 0.000004491  | -3.334241249 | 0.162659053  |
| C | -0.047870940 | -2.573558976 | -1.028539371 |
| B | 0.000000000  | 0.000000000  | -1.624619902 |
| N | 0.000000000  | 0.000000000  | 1.358001417  |
| F | 1.134451202  | -0.107373595 | -2.428320581 |
| F | -1.134451202 | 0.107373595  | -2.428320581 |
| H | -0.010069034 | 4.412390844  | 0.221334577  |
| H | 0.010069034  | -4.412390844 | 0.221334577  |
| C | -0.026473970 | -2.875117204 | 2.644297528  |
| N | 0.245390708  | -4.174513198 | 2.874289967  |
| C | -0.321498401 | -1.986086630 | 3.684849985  |
| C | 0.242542998  | -4.605926998 | 4.130024420  |
| C | -0.317780237 | -2.455657904 | 4.991086791  |
| C | -0.026612704 | -3.792046801 | 5.228395873  |
| H | -0.556702176 | -0.955439921 | 3.458221991  |
| H | 0.468099733  | -5.660466578 | 4.274021424  |
| H | -0.545282875 | -1.783163549 | 5.812129095  |
| H | -0.011186157 | -4.201708622 | 6.232069184  |
| C | 0.026473970  | 2.875117204  | 2.644297528  |

|   |              |              |              |
|---|--------------|--------------|--------------|
| N | -0.245390708 | 4.174513198  | 2.874289967  |
| C | 0.321498401  | 1.986086630  | 3.684849985  |
| C | -0.242542998 | 4.605926998  | 4.130024420  |
| C | 0.317780237  | 2.455657904  | 4.991086791  |
| C | 0.026612704  | 3.792046801  | 5.228395873  |
| H | 0.556702176  | 0.955439921  | 3.458221991  |
| H | -0.468099733 | 5.660466578  | 4.274021424  |
| H | 0.545282875  | 1.783163549  | 5.812129095  |
| H | 0.011186157  | 4.201708622  | 6.232069184  |
| C | 0.065131767  | 3.111547296  | -2.347377131 |
| C | 0.388862621  | 2.530311785  | -3.565597770 |
| C | 0.305567895  | 3.429283462  | -4.647677771 |
| C | -0.079398533 | 4.688595830  | -4.268162230 |
| S | -0.345947316 | 4.802762821  | -2.580084224 |
| H | 0.712637381  | 1.504179837  | -3.652673336 |
| H | 0.528498632  | 3.159502201  | -5.672710417 |
| H | -0.224265606 | 5.555856438  | -4.898046783 |
| C | -0.065131767 | -3.111547296 | -2.347377131 |
| C | -0.388862621 | -2.530311785 | -3.565597770 |
| C | -0.305567895 | -3.429283462 | -4.647677771 |
| C | 0.079398533  | -4.688595830 | -4.268162230 |
| S | 0.345947316  | -4.802762821 | -2.580084224 |
| H | -0.712637381 | -1.504179837 | -3.652673336 |
| H | -0.528498632 | -3.159502201 | -5.672710417 |
| H | 0.224265606  | -5.555856438 | -4.898046783 |

34

A7 ES CAM-B3LYP/6-31G(d)

|   |              |             |             |
|---|--------------|-------------|-------------|
| N | 0.041853003  | 1.235943097 | 1.065523082 |
| C | -0.015443001 | 1.138348085 | 2.445795188 |



|   |              |              |              |
|---|--------------|--------------|--------------|
| C | -0.102662008 | 2.450298185  | 3.003049227  |
| C | -0.114267009 | 3.325224254  | 1.954153148  |
| C | -0.022494002 | 2.570413197  | 0.741138058  |
| N | -0.041853003 | -1.235943097 | 1.065523082  |
| C | 0.015443001  | -1.138348085 | 2.445795188  |
| C | 0.102662008  | -2.450298185 | 3.003049227  |
| C | 0.114267009  | -3.325224254 | 1.954153148  |
| C | 0.022494002  | -2.570413197 | 0.741138058  |
| B | 0.000000000  | 0.000000000  | 0.134492010  |
| N | 0.000000000  | 0.000000000  | 3.134790237  |
| F | 1.136702084  | -0.070074005 | -0.671817051 |
| F | -1.136702084 | 0.070074005  | -0.671817051 |
| H | -0.158053012 | 4.404477337  | 2.005147155  |
| C | 0.000000000  | 3.124637236  | -0.566969045 |
| C | 0.000000000  | -3.124637236 | -0.566969045 |
| H | 0.158053012  | -4.404477337 | 2.005147155  |
| S | 0.412736031  | -4.819977370 | -0.785094061 |
| C | 0.146991011  | -4.721641362 | -2.474771188 |
| C | -0.238024018 | -3.465297265 | -2.865836218 |
| C | -0.323218025 | -2.555909195 | -1.793930136 |
| C | 0.323218025  | 2.555909195  | -1.793930136 |
| C | 0.238024018  | 3.465297265  | -2.865836218 |
| C | -0.146991011 | 4.721641362  | -2.474771188 |
| S | -0.412736031 | 4.819977370  | -0.785094061 |
| H | 0.291042022  | -5.595060429 | -3.096279236 |
| H | -0.460431035 | -3.205996243 | -3.893786297 |
| H | -0.649096047 | -1.531396116 | -1.891174145 |
| H | 0.649096047  | 1.531396116  | -1.891174145 |
| H | 0.460431035  | 3.205996243  | -3.893786297 |

|   |              |              |              |
|---|--------------|--------------|--------------|
| H | -0.291042022 | 5.595060429  | -3.096279236 |
| H | -0.145120011 | 2.661212202  | 4.061520308  |
| H | 0.145120011  | -2.661212202 | 4.061520308  |

52

B1 ES CAM-B3LYP/6-31G(d)

|   |              |              |              |
|---|--------------|--------------|--------------|
| N | -0.019689002 | 1.218858641  | -1.626965448 |
| C | 0.000000000  | 1.143650129  | -0.260559874 |
| C | -0.021814277 | 2.499736977  | 0.273869556  |
| C | -0.068286530 | 3.336334547  | -0.850789405 |
| C | -0.058561261 | 2.545042609  | -1.990884468 |
| N | 0.019689002  | -1.218858641 | -1.626965448 |
| C | 0.000000000  | -1.143650129 | -0.260559874 |
| C | 0.021814277  | -2.499736977 | 0.273869556  |
| C | 0.068286530  | -3.336334547 | -0.850789405 |
| C | 0.058561261  | -2.545042609 | -1.990884468 |
| B | 0.000000000  | 0.000000000  | -2.572249283 |
| N | 0.000000000  | 0.000000000  | 0.429988490  |
| F | 1.137107154  | 0.018209206  | -3.378191854 |
| F | -1.137107154 | -0.018209206 | -3.378191854 |
| C | -0.006325114 | 2.891972261  | 1.662656723  |
| H | -0.075947301 | 4.415898898  | -0.853876964 |
| H | 0.075947301  | -4.415898898 | -0.853876964 |
| C | 0.006325114  | -2.891972261 | 1.662656723  |
| C | 0.350221840  | 2.408401185  | 4.019555648  |
| C | 0.326756472  | 1.991396484  | 2.697442519  |
| C | -0.289121941 | 4.630810664  | 3.342113602  |
| C | -0.350221840 | -2.408401185 | 4.019555648  |
| C | 0.041765887  | 3.725014533  | 4.351892629  |
| C | -0.311288346 | 4.224228538  | 2.020761419  |

|   |              |              |              |
|---|--------------|--------------|--------------|
| C | -0.326756472 | -1.991396484 | 2.697442519  |
| C | -0.041765887 | -3.725014533 | 4.351892629  |
| H | 0.057342189  | 4.045926545  | 5.388602454  |
| H | -0.577167095 | -0.970059395 | 2.444909054  |
| H | -0.057342189 | -4.045926545 | 5.388602454  |
| H | -0.534131867 | 5.658107188  | 3.592534638  |
| H | -0.614734796 | -1.699658532 | 4.798183639  |
| H | -0.585118179 | 4.936418024  | 1.250269920  |
| C | 0.311288346  | -4.224228538 | 2.020761419  |
| C | 0.289121941  | -4.630810664 | 3.342113602  |
| H | 0.614734796  | 1.699658532  | 4.798183639  |
| H | 0.577167095  | 0.970059395  | 2.444909054  |
| H | 0.585118179  | -4.936418024 | 1.250269920  |
| H | 0.534131867  | -5.658107188 | 3.592534638  |
| C | 0.075026631  | -2.942607406 | -3.425984015 |
| H | -0.799489825 | -2.492291120 | -3.913104172 |
| H | 0.938035409  | -2.458951503 | -3.901561647 |
| C | 0.105952354  | -4.448551261 | -3.658997834 |
| H | -0.774121422 | -4.936529537 | -3.229622616 |
| H | 0.996557708  | -4.902410649 | -3.214174826 |
| H | 0.119439086  | -4.663257781 | -4.730470181 |
| C | -0.075026631 | 2.942607406  | -3.425984015 |
| H | 0.799489825  | 2.492291120  | -3.913104172 |
| H | -0.938035409 | 2.458951503  | -3.901561647 |
| C | -0.105952354 | 4.448551261  | -3.658997834 |
| H | 0.774121422  | 4.936529537  | -3.229622616 |
| H | -0.996557708 | 4.902410649  | -3.214174826 |
| H | -0.119439086 | 4.663257781  | -4.730470181 |

B2 ES CAM-B3LYP/6-31G(d)

|   |              |              |              |
|---|--------------|--------------|--------------|
| N | -0.005461073 | 1.218925709  | -1.565214861 |
| C | 0.019203295  | 1.138479718  | -0.202066264 |
| C | 0.036187024  | 2.489105494  | 0.328614484  |
| C | 0.000000000  | 3.339419650  | -0.795244532 |
| C | -0.018075066 | 2.551580837  | -1.929282474 |
| N | 0.005461073  | -1.218925709 | -1.565214861 |
| C | -0.019203295 | -1.138479718 | -0.202066264 |
| C | -0.036187024 | -2.489105494 | 0.328614484  |
| C | 0.000000000  | -3.339419650 | -0.795244532 |
| C | 0.018075066  | -2.551580837 | -1.929282474 |
| B | 0.000000000  | 0.000000000  | -2.511254059 |
| N | 0.000000000  | 0.000000000  | 0.495705264  |
| F | 1.137247925  | 0.005710124  | -3.317580733 |
| F | -1.137247925 | -0.005710124 | -3.317580733 |
| H | 0.007190119  | 4.419816587  | -0.784562724 |
| H | -0.007190119 | -4.419816587 | -0.784562724 |
| C | -0.088003971 | -2.838600428 | 1.702817572  |
| S | 0.081870896  | -4.507175771 | 2.212557670  |
| C | -0.286457019 | -2.021489006 | 2.810526564  |
| C | -0.112236625 | -4.076951524 | 3.865088735  |
| C | -0.299784879 | -2.729686336 | 4.029770092  |
| H | -0.442105596 | -0.957002693 | 2.712300752  |
| H | -0.074703071 | -4.839643311 | 4.630936725  |
| H | -0.445463355 | -2.264483066 | 4.997115474  |
| C | 0.088003971  | 2.838600428  | 1.702817572  |
| S | -0.081870896 | 4.507175771  | 2.212557670  |
| C | 0.286457019  | 2.021489006  | 2.810526564  |
| C | 0.112236625  | 4.076951524  | 3.865088735  |

|   |              |              |              |
|---|--------------|--------------|--------------|
| C | 0.299784879  | 2.729686336  | 4.029770092  |
| H | 0.442105596  | 0.957002693  | 2.712300752  |
| H | 0.074703071  | 4.839643311  | 4.630936725  |
| H | 0.445463355  | 2.264483066  | 4.997115474  |
| C | 0.040559150  | -2.947518663 | -3.366348009 |
| H | -0.822955756 | -2.484771379 | -3.860365748 |
| H | 0.915974395  | -2.480296910 | -3.834401471 |
| C | 0.048021724  | -4.454186761 | -3.597001322 |
| H | -0.843646280 | -4.926483250 | -3.173871289 |
| H | 0.926978636  | -4.922184214 | -3.143549068 |
| H | 0.066860651  | -4.671600117 | -4.667877048 |
| C | -0.040559150 | 2.947518663  | -3.366348009 |
| H | 0.822955756  | 2.484771379  | -3.860365748 |
| H | -0.915974395 | 2.480296910  | -3.834401471 |
| C | -0.048021724 | 4.454186761  | -3.597001322 |
| H | 0.843646280  | 4.926483250  | -3.173871289 |
| H | -0.926978636 | 4.922184214  | -3.143549068 |
| H | -0.066860651 | 4.671600117  | -4.667877048 |

46

B3 ES CAM-B3LYP/6-31G(d)

|   |              |              |              |
|---|--------------|--------------|--------------|
| N | -0.024313530 | 1.219148360  | -1.330088920 |
| C | 0.000201351  | 1.136521344  | 0.033477319  |
| C | 0.000000000  | 2.481679195  | 0.559735669  |
| C | -0.044237073 | 3.340562462  | -0.555453238 |
| C | -0.052731578 | 2.553462840  | -1.691280032 |
| N | 0.024313530  | -1.219148360 | -1.330088920 |
| C | -0.000201351 | -1.136521344 | 0.033477319  |
| C | 0.000000000  | -2.481679195 | 0.559735669  |
| C | 0.044237073  | -3.340562462 | -0.555453238 |

|   |              |              |              |
|---|--------------|--------------|--------------|
| C | 0.052731578  | -2.553462840 | -1.691280032 |
| B | 0.000000000  | 0.000000000  | -2.276107550 |
| N | 0.000000000  | 0.000000000  | 0.735955270  |
| F | 1.137024046  | 0.023487387  | -3.082974757 |
| F | -1.137024046 | -0.023487387 | -3.082974757 |
| H | -0.055263341 | 4.419598021  | -0.529773616 |
| H | 0.055263341  | -4.419598021 | -0.529773616 |
| C | -0.053313597 | -2.822024051 | 1.928821624  |
| O | 0.041679543  | -4.150511993 | 2.250174774  |
| C | -0.209928894 | -2.089117864 | 3.092621505  |
| C | -0.051055675 | -4.247953337 | 3.593250625  |
| C | -0.207776168 | -3.016198726 | 4.159871022  |
| H | -0.337716700 | -1.019801163 | 3.136629033  |
| H | 0.012922562  | -5.245425194 | 4.000652452  |
| H | -0.310575150 | -2.805504042 | 5.214211351  |
| C | 0.053313597  | 2.822024051  | 1.928821624  |
| O | -0.041679543 | 4.150511993  | 2.250174774  |
| C | 0.209928894  | 2.089117864  | 3.092621505  |
| C | 0.051055675  | 4.247953337  | 3.593250625  |
| C | 0.207776168  | 3.016198726  | 4.159871022  |
| H | 0.337716700  | 1.019801163  | 3.136629033  |
| H | -0.012922562 | 5.245425194  | 4.000652452  |
| H | 0.310575150  | 2.805504042  | 5.214211351  |
| C | -0.082113508 | 2.951191566  | -3.128143797 |
| H | 0.785886218  | 2.499848607  | -3.624827044 |
| H | -0.953053898 | 2.475859293  | -3.596430351 |
| C | -0.106724867 | 4.458265590  | -3.355218761 |
| H | 0.779788524  | 4.939363673  | -2.931154301 |
| H | -0.990348538 | 4.915141214  | -2.899482890 |

|   |              |              |              |
|---|--------------|--------------|--------------|
| H | -0.128910965 | 4.678551236  | -4.425493701 |
| C | 0.082113508  | -2.951191566 | -3.128143797 |
| H | -0.785886218 | -2.499848607 | -3.624827044 |
| H | 0.953053898  | -2.475859293 | -3.596430351 |
| C | 0.106724867  | -4.458265590 | -3.355218761 |
| H | -0.779788524 | -4.939363673 | -2.931154301 |
| H | 0.990348538  | -4.915141214 | -2.899482890 |
| H | 0.128910965  | -4.678551236 | -4.425493701 |

50

B4 ES CAM-B3LYP/6-31G(d)

|   |              |              |              |
|---|--------------|--------------|--------------|
| N | 0.018876242  | 1.219098967  | -1.622278113 |
| C | 0.000000000  | 1.141900494  | -0.254448816 |
| C | 0.020750508  | 2.496878986  | 0.281794662  |
| C | 0.064250619  | 3.335278145  | -0.835212972 |
| C | 0.055749480  | 2.542583617  | -1.981639647 |
| N | -0.018876242 | -1.219098967 | -1.622278113 |
| C | 0.000000000  | -1.141900494 | -0.254448816 |
| C | -0.020750508 | -2.496878986 | 0.281794662  |
| C | -0.064250619 | -3.335278145 | -0.835212972 |
| C | -0.055749480 | -2.542583617 | -1.981639647 |
| B | 0.000000000  | 0.000000000  | -2.570716405 |
| N | 0.000000000  | 0.000000000  | 0.437881175  |
| F | 1.137173412  | -0.017238565 | -3.373030386 |
| F | -1.137173412 | 0.017238565  | -3.373030386 |
| H | 0.068271876  | 4.414936234  | -0.837183528 |
| H | -0.068271876 | -4.414936234 | -0.837183528 |
| C | -0.010748516 | -2.872977031 | 1.675493632  |
| C | -0.364390010 | -4.185137564 | 2.055932253  |
| C | 0.352452425  | -1.995773119 | 2.713328134  |

|   |              |              |              |
|---|--------------|--------------|--------------|
| N | -0.368704537 | -4.629647924 | 3.304446051  |
| C | 0.348183503  | -2.454428948 | 4.019837969  |
| C | -0.014548659 | -3.772868412 | 4.270364274  |
| H | 0.641754443  | -0.979317209 | 2.481315042  |
| H | 0.629691070  | -1.801263766 | 4.838539997  |
| H | -0.022583999 | -4.161433730 | 5.285642675  |
| H | -0.675920217 | -4.898491202 | 1.297040875  |
| C | 0.010748516  | 2.872977031  | 1.675493632  |
| C | 0.364390010  | 4.185137564  | 2.055932253  |
| C | -0.352452425 | 1.995773119  | 2.713328134  |
| N | 0.368704537  | 4.629647924  | 3.304446051  |
| C | -0.348183503 | 2.454428948  | 4.019837969  |
| C | 0.014548659  | 3.772868412  | 4.270364274  |
| H | 0.675920217  | 4.898491202  | 1.297040875  |
| H | -0.641754443 | 0.979317209  | 2.481315042  |
| H | -0.629691070 | 1.801263766  | 4.838539997  |
| H | 0.022583999  | 4.161433730  | 5.285642675  |
| C | -0.070830983 | -2.945907753 | -3.413719973 |
| H | -0.934743434 | -2.464051200 | -3.890205201 |
| H | 0.802392521  | -2.492973843 | -3.901354278 |
| C | -0.097962749 | -4.452352918 | -3.643461381 |
| H | -0.987770619 | -4.907633935 | -3.198739657 |
| H | 0.783477747  | -4.937326865 | -3.213722146 |
| H | -0.110624571 | -4.667968871 | -4.714637854 |
| C | 0.070830983  | 2.945907753  | -3.413719973 |
| H | 0.934743434  | 2.464051200  | -3.890205201 |
| H | -0.802392521 | 2.492973843  | -3.901354278 |
| C | 0.097962749  | 4.452352918  | -3.643461381 |
| H | 0.987770619  | 4.907633935  | -3.198739657 |



|                          |              |              |              |
|--------------------------|--------------|--------------|--------------|
| H                        | -0.783477747 | 4.937326865  | -3.213722146 |
| H                        | 0.110624571  | 4.667968871  | -4.714637854 |
| 50                       |              |              |              |
| B5 ES CAM-B3LYP/6-31G(d) |              |              |              |
| N                        | 0.020181083  | 1.219245469  | -1.634088253 |
| C                        | 0.000000000  | 1.141683383  | -0.261499215 |
| C                        | 0.018341814  | 2.497159540  | 0.274584300  |
| C                        | 0.061534620  | 3.332126778  | -0.837559387 |
| C                        | 0.055079153  | 2.536623690  | -1.991176627 |
| N                        | -0.020181083 | -1.219245469 | -1.634088253 |
| C                        | 0.000000000  | -1.141683383 | -0.261499215 |
| C                        | -0.018341814 | -2.497159540 | 0.274584300  |
| C                        | -0.061534620 | -3.332126778 | -0.837559387 |
| C                        | -0.055079153 | -2.536623690 | -1.991176627 |
| B                        | 0.000000000  | 0.000000000  | -2.584448073 |
| N                        | 0.000000000  | 0.000000000  | 0.427892483  |
| F                        | 1.137155055  | -0.018732777 | -3.384054005 |
| F                        | -1.137155055 | 0.018732777  | -3.384054005 |
| H                        | 0.068003535  | 4.411880871  | -0.839537980 |
| H                        | -0.068003535 | -4.411880871 | -0.839537980 |
| C                        | -0.002937817 | -2.883319975 | 1.671020359  |
| C                        | -0.329095085 | -4.196785215 | 2.052787168  |
| C                        | 0.349684731  | -2.000489702 | 2.705138947  |
| C                        | -0.291711712 | -4.547373970 | 3.390767439  |
| C                        | 0.355680732  | -2.459039484 | 4.014633183  |
| N                        | 0.042084257  | -3.705352957 | 4.375773652  |
| H                        | 0.623945623  | -0.977924456 | 2.486023237  |
| H                        | -0.547510706 | -5.560893200 | 3.690954203  |
| H                        | 0.630836289  | -1.780638135 | 4.819209221  |

|   |              |              |              |
|---|--------------|--------------|--------------|
| H | -0.626353846 | -4.934330330 | 1.316371757  |
| C | 0.002937817  | 2.883319975  | 1.671020359  |
| C | 0.329095085  | 4.196785215  | 2.052787168  |
| C | -0.349684731 | 2.000489702  | 2.705138947  |
| C | 0.291711712  | 4.547373970  | 3.390767439  |
| C | -0.355680732 | 2.459039484  | 4.014633183  |
| N | -0.042084257 | 3.705352957  | 4.375773652  |
| H | 0.626353846  | 4.934330330  | 1.316371757  |
| H | -0.623945623 | 0.977924456  | 2.486023237  |
| H | 0.547510706  | 5.560893200  | 3.690954203  |
| H | -0.630836289 | 1.780638135  | 4.819209221  |
| C | 0.072856658  | 2.945001769  | -3.420587296 |
| H | 0.937486340  | 2.462884899  | -3.896116265 |
| H | -0.799091741 | 2.491171788  | -3.910305496 |
| C | 0.099696291  | 4.451793864  | -3.647813578 |
| H | 0.988922511  | 4.906888827  | -3.201944180 |
| H | -0.782803231 | 4.935859969  | -3.219450268 |
| H | 0.113817502  | 4.667812478  | -4.718791250 |
| C | -0.072856658 | -2.945001769 | -3.420587296 |
| H | -0.937486340 | -2.462884899 | -3.896116265 |
| H | 0.799091741  | -2.491171788 | -3.910305496 |
| C | -0.099696291 | -4.451793864 | -3.647813578 |
| H | -0.988922511 | -4.906888827 | -3.201944180 |
| H | 0.782803231  | -4.935859969 | -3.219450268 |
| H | -0.113817502 | -4.667812478 | -4.718791250 |

50

B6 ES CAM-B3LYP/6-31G(d)

|   |              |             |              |
|---|--------------|-------------|--------------|
| N | 0.006610654  | 1.218924428 | -1.601708257 |
| C | -0.021837068 | 1.142578407 | -0.231302769 |

|   |              |              |              |
|---|--------------|--------------|--------------|
| C | -0.040549783 | 2.500504840  | 0.296584220  |
| C | 0.000000000  | 3.336766546  | -0.816000938 |
| C | 0.019779030  | 2.541140239  | -1.962918266 |
| N | -0.006610654 | -1.218924428 | -1.601708257 |
| C | 0.021837068  | -1.142578407 | -0.231302769 |
| C | 0.040549783  | -2.500504840 | 0.296584220  |
| C | 0.000000000  | -3.336766546 | -0.816000938 |
| C | -0.019779030 | -2.541140239 | -1.962918266 |
| B | 0.000000000  | 0.000000000  | -2.549473278 |
| N | 0.000000000  | 0.000000000  | 0.459498301  |
| F | 1.137257694  | -0.006865190 | -3.352286442 |
| F | -1.137257694 | 0.006865190  | -3.352286442 |
| H | 0.000891315  | 4.415115223  | -0.791775035 |
| H | -0.000891315 | -4.415115223 | -0.791775035 |
| C | 0.093151583  | -2.924443995 | 1.679630168  |
| N | -0.059064482 | -4.252064082 | 1.888230062  |
| C | 0.311791590  | -2.031721849 | 2.741835103  |
| C | -0.010661322 | -4.701683579 | 3.133121186  |
| C | 0.360002319  | -2.524669184 | 4.037863186  |
| C | 0.191620927  | -3.885966047 | 4.248725486  |
| H | 0.452685162  | -0.980286100 | 2.534178013  |
| H | -0.139518649 | -5.774532163 | 3.260672355  |
| H | 0.530422853  | -1.850633680 | 4.871242628  |
| H | 0.218671954  | -4.315675558 | 5.243715417  |
| C | -0.093151583 | 2.924443995  | 1.679630168  |
| N | 0.059064482  | 4.252064082  | 1.888230062  |
| C | -0.311791590 | 2.031721849  | 2.741835103  |
| C | 0.010661322  | 4.701683579  | 3.133121186  |
| C | -0.360002319 | 2.524669184  | 4.037863186  |

|   |              |              |              |
|---|--------------|--------------|--------------|
| C | -0.191620927 | 3.885966047  | 4.248725486  |
| H | -0.452685162 | 0.980286100  | 2.534178013  |
| H | 0.139518649  | 5.774532163  | 3.260672355  |
| H | -0.530422853 | 1.850633680  | 4.871242628  |
| H | -0.218671954 | 4.315675558  | 5.243715417  |
| C | -0.045269350 | -2.942412934 | -3.395060675 |
| H | -0.920956149 | -2.472330226 | -3.861841523 |
| H | 0.815880201  | -2.475664085 | -3.891443222 |
| C | -0.052120368 | -4.448890326 | -3.625877265 |
| H | -0.930146868 | -4.917537022 | -3.171883356 |
| H | 0.840636558  | -4.920594857 | -3.205025573 |
| H | -0.072569238 | -4.664025564 | -4.697071789 |
| C | 0.045269350  | 2.942412934  | -3.395060675 |
| H | 0.920956149  | 2.472330226  | -3.861841523 |
| H | -0.815880201 | 2.475664085  | -3.891443222 |
| C | 0.052120368  | 4.448890326  | -3.625877265 |
| H | 0.930146868  | 4.917537022  | -3.171883356 |
| H | -0.840636558 | 4.920594857  | -3.205025573 |
| H | 0.072569238  | 4.664025564  | -4.697071789 |

32

B7 ES CAM-B3LYP/6-31G(d)

|   |             |              |              |
|---|-------------|--------------|--------------|
| N | 0.000000000 | 1.216881095  | 0.265733020  |
| C | 0.000000000 | 1.138127085  | 1.666381126  |
| C | 0.000000000 | 2.465941188  | 2.185057164  |
| C | 0.000000000 | 3.316287254  | 1.101500087  |
| C | 0.000000000 | 2.518795190  | -0.081999006 |
| N | 0.000000000 | -1.216881095 | 0.265733020  |
| C | 0.000000000 | -1.138127085 | 1.666381126  |
| C | 0.000000000 | -2.465941188 | 2.185057164  |

|   |              |              |              |
|---|--------------|--------------|--------------|
| C | 0.000000000  | -3.316287254 | 1.101500087  |
| C | 0.000000000  | -2.518795190 | -0.081999006 |
| B | 0.000000000  | 0.000000000  | -0.682806051 |
| N | 0.000000000  | 0.000000000  | 2.365040179  |
| F | 1.136685087  | 0.000000000  | -1.488100115 |
| F | -1.136685087 | 0.000000000  | -1.488100115 |
| H | 0.000000000  | 4.396994337  | 1.115816083  |
| H | 0.000000000  | -4.396994337 | 1.115816083  |
| C | 0.000000000  | -2.948789223 | -1.506163114 |
| H | -0.868377066 | -2.489558189 | -1.998276154 |
| H | 0.868377066  | -2.489558189 | -1.998276154 |
| C | 0.000000000  | -4.459492340 | -1.711497132 |
| H | -0.885889065 | -4.922942377 | -1.267480097 |
| H | 0.885889065  | -4.922942377 | -1.267480097 |
| H | 0.000000000  | -4.692170359 | -2.779220211 |
| C | 0.000000000  | 2.948789223  | -1.506163114 |
| H | 0.868377066  | 2.489558189  | -1.998276154 |
| H | -0.868377066 | 2.489558189  | -1.998276154 |
| C | 0.000000000  | 4.459492340  | -1.711497132 |
| H | 0.885889065  | 4.922942377  | -1.267480097 |
| H | -0.885889065 | 4.922942377  | -1.267480097 |
| H | 0.000000000  | 4.692170359  | -2.779220211 |
| H | 0.000000000  | -2.710217207 | 3.237389250  |
| H | 0.000000000  | 2.710217207  | 3.237389250  |

60

C1 ES CAM-B3LYP/6-31G(d)

|   |              |              |             |
|---|--------------|--------------|-------------|
| N | -0.678961060 | -1.240648091 | 0.166548839 |
| C | 0.692759420  | -1.152414971 | 0.175027770 |
| C | 1.258782355  | -2.482388038 | 0.048860552 |

|   |              |              |              |
|---|--------------|--------------|--------------|
| C | 0.170876328  | -3.326068455 | -0.089495782 |
| C | -1.013872097 | -2.569608223 | -0.000881398 |
| N | -0.664313693 | 1.239379140  | 0.137900815  |
| C | 0.706761582  | 1.136755510  | 0.118568071  |
| C | 1.284716681  | 2.460867448  | -0.033456718 |
| C | 0.200155506  | 3.314766409  | -0.139174221 |
| C | -0.989097404 | 2.571304422  | -0.030759864 |
| B | -1.592302502 | 0.006002969  | 0.286611918  |
| N | 1.378327956  | -0.011319688 | 0.182871397  |
| F | -2.176734360 | 0.022701443  | 1.566680608  |
| F | -2.570329767 | 0.000780786  | -0.688547783 |
| H | 0.198788221  | -4.402886863 | -0.166777660 |
| H | 0.233750354  | 4.386787704  | -0.262266526 |
| C | -2.324228241 | 3.136710309  | -0.089163153 |
| C | -3.429637212 | 2.589472548  | 0.588437158  |
| C | -2.513864777 | 4.324369231  | -0.825812149 |
| C | -4.669206934 | 3.206888425  | 0.521732919  |
| C | -3.757007023 | 4.929542053  | -0.893055782 |
| C | -4.842965639 | 4.373382379  | -0.218809631 |
| H | -3.302811062 | 1.702192450  | 1.192012855  |
| H | -1.682505955 | 4.752076642  | -1.374870762 |
| H | -5.507691625 | 2.776514257  | 1.060057189  |
| H | -3.882823840 | 5.834929173  | -1.477910166 |
| H | -5.817606662 | 4.848259856  | -0.269279569 |
| C | -2.352784317 | -3.123761633 | -0.051987373 |
| C | -2.553200257 | -4.317853339 | -0.775273595 |
| C | -3.452456880 | -2.558281147 | 0.620341995  |
| C | -3.801837729 | -4.912278720 | -0.834945595 |
| C | -4.697563236 | -3.164786210 | 0.560967308  |

|   |              |              |              |
|---|--------------|--------------|--------------|
| C | -4.882103520 | -4.338072752 | -0.166526647 |
| H | -1.725031115 | -4.759085589 | -1.318610960 |
| H | -3.316433117 | -1.665312320 | 1.213741428  |
| H | -3.936650771 | -5.823263619 | -1.408980258 |
| H | -5.531989010 | -2.720976925 | 1.094638430  |
| H | -5.861147101 | -4.804397354 | -0.211224866 |
| C | 2.669192232  | -2.837817542 | 0.044551329  |
| C | 3.079124410  | -4.063152355 | -0.512142607 |
| C | 3.650874297  | -2.003932683 | 0.608590604  |
| C | 4.413097830  | -4.437741250 | -0.506867832 |
| C | 4.986002847  | -2.384316217 | 0.611256890  |
| C | 5.375187123  | -3.599401348 | 0.054655381  |
| H | 2.343070316  | -4.715468324 | -0.970312173 |
| H | 3.355629995  | -1.060571428 | 1.049153582  |
| H | 4.706958926  | -5.384887630 | -0.948206799 |
| H | 5.727479204  | -1.727851800 | 1.056109749  |
| H | 6.420337855  | -3.892165549 | 0.056051881  |
| C | 2.696549902  | 2.815411325  | -0.056661989 |
| C | 3.710051585  | 1.865021887  | -0.276655110 |
| C | 3.078804999  | 4.157792859  | 0.129463155  |
| C | 5.044238719  | 2.247702511  | -0.311256534 |
| C | 4.411603973  | 4.532947698  | 0.095225756  |
| C | 5.404289702  | 3.578954727  | -0.125776411 |
| H | 3.439193867  | 0.828703764  | -0.426265252 |
| H | 2.321692593  | 4.910295210  | 0.321903032  |
| H | 5.808874973  | 1.497233619  | -0.487274935 |
| H | 4.680336913  | 5.573578108  | 0.247391626  |
| H | 6.448828758  | 3.872973058  | -0.150441177 |

## C2 ES CAM-B3LYP/6-31G(d)

|   |              |              |              |
|---|--------------|--------------|--------------|
| N | 0.223262842  | 1.285361706  | 0.158711556  |
| C | -1.031285388 | 0.736135815  | 0.171468830  |
| C | -2.008342190 | 1.802944178  | 0.048646192  |
| C | -1.264961372 | 2.973296522  | -0.090720238 |
| C | 0.090486759  | 2.656618468  | -0.010280424 |
| N | 1.063689721  | -1.040687217 | 0.160114560  |
| C | -0.252614723 | -1.409188489 | 0.141670782  |
| C | -0.337541798 | -2.846984061 | -0.017988495 |
| C | 0.982410990  | -3.287446692 | -0.122229801 |
| C | 1.830049309  | -2.187840700 | -0.008459704 |
| B | 1.511259689  | 0.434729699  | 0.303641024  |
| N | -1.288760087 | -0.572509822 | 0.192705747  |
| F | 2.046379360  | 0.632158100  | 1.589934026  |
| F | 2.440331026  | 0.768667536  | -0.661498010 |
| H | -1.657384811 | 3.976208390  | -0.177919515 |
| H | 1.313247987  | -4.309678233 | -0.228245664 |
| C | -1.522517554 | -3.638416147 | -0.067442473 |
| S | -3.136750442 | -2.976406127 | 0.061893003  |
| C | -1.587268042 | -5.015519513 | -0.220005366 |
| C | -3.843736988 | -4.533518527 | -0.082892797 |
| C | -2.903482189 | -5.519734058 | -0.228025053 |
| H | -0.704802134 | -5.635255516 | -0.321890862 |
| H | -4.919459465 | -4.642963082 | -0.057953462 |
| H | -3.148754860 | -6.569161759 | -0.336719483 |
| C | -3.427457673 | 1.656601898  | 0.070668147  |
| S | -4.468461037 | 3.013818921  | -0.302738041 |
| C | -4.189122337 | 0.544789883  | 0.386446030  |
| C | -5.881840207 | 2.072325577  | -0.029603031 |



|   |              |              |              |
|---|--------------|--------------|--------------|
| C | -5.580896100 | 0.787153301  | 0.328162033  |
| H | -3.741322209 | -0.399283393 | 0.658589450  |
| H | -6.859973657 | 2.517077618  | -0.151450588 |
| H | -6.333152305 | 0.038372314  | 0.544898740  |
| C | 1.177360138  | 3.623945536  | -0.083460704 |
| C | 2.383623900  | 3.487236287  | 0.623356443  |
| C | 0.983579080  | 4.781256237  | -0.860496522 |
| C | 3.356694970  | 4.473034186  | 0.545680292  |
| C | 1.962562997  | 5.758848566  | -0.937276193 |
| C | 3.155673064  | 5.609073783  | -0.233725072 |
| H | 2.542009307  | 2.622294147  | 1.252095994  |
| H | 0.067439110  | 4.894797656  | -1.429847643 |
| H | 4.279181997  | 4.355786373  | 1.105568819  |
| H | 1.797637547  | 6.637375670  | -1.552713133 |
| H | 3.923339127  | 6.374131844  | -0.292324645 |
| C | 3.285137061  | -2.246267578 | -0.058423463 |
| C | 4.117466959  | -1.377756932 | 0.666768186  |
| C | 3.884044557  | -3.259035001 | -0.830493849 |
| C | 5.496468357  | -1.520876396 | 0.612981880  |
| C | 5.262289237  | -3.392136473 | -0.883332219 |
| C | 6.076345285  | -2.522457176 | -0.160847281 |
| H | 3.679349536  | -0.610729570 | 1.289961722  |
| H | 3.259003314  | -3.925455629 | -1.414888765 |
| H | 6.124431357  | -0.846663082 | 1.186827611  |
| H | 5.703758886  | -4.172240530 | -1.495155566 |
| H | 7.156044676  | -2.625759666 | -0.200959114 |

54

C3 ES CAM-B3LYP/6-31G(d)

|   |              |             |             |
|---|--------------|-------------|-------------|
| N | -0.325735118 | 1.249853828 | 0.132823719 |
|---|--------------|-------------|-------------|

|   |              |              |              |
|---|--------------|--------------|--------------|
| C | -1.441323529 | 0.456913827  | 0.161953318  |
| C | -2.610408340 | 1.298614833  | 0.050988307  |
| C | -2.135052497 | 2.597530562  | -0.104515191 |
| C | -0.740734831 | 2.564533583  | -0.040103365 |
| N | 0.961102536  | -0.867511803 | 0.168221503  |
| C | -0.257864514 | -1.488838401 | 0.135668557  |
| C | -0.049220181 | -2.910134688 | -0.016429903 |
| C | 1.329296779  | -3.091070915 | -0.087250954 |
| C | 1.942299006  | -1.842668128 | 0.025537906  |
| B | 1.105598173  | 0.672640815  | 0.287006174  |
| N | -1.440756812 | -0.875353766 | 0.184542737  |
| F | 1.588120727  | 0.994344477  | 1.569054978  |
| F | 1.952201230  | 1.166906871  | -0.685052657 |
| H | -2.735120526 | 3.490131395  | -0.196189257 |
| H | 1.844386383  | -4.034981662 | -0.180986681 |
| C | -1.070418702 | -3.891872274 | -0.096664231 |
| O | -0.667202143 | -5.198496268 | -0.161902584 |
| C | -2.447382053 | -3.841930716 | -0.149973561 |
| C | -1.779802188 | -5.959501413 | -0.253288948 |
| C | -2.898444279 | -5.181427990 | -0.252192466 |
| H | -3.035997507 | -2.939438995 | -0.144185891 |
| H | -1.619848459 | -7.025388115 | -0.307946604 |
| H | -3.919566903 | -5.527152647 | -0.317931093 |
| C | -3.956122758 | 0.851975741  | 0.105992926  |
| O | -4.928434835 | 1.778771685  | -0.156290105 |
| C | -4.552407752 | -0.353527252 | 0.409061866  |
| C | -6.122041963 | 1.159528574  | -0.022850156 |
| C | -5.952085894 | -0.147202885 | 0.323523661  |
| H | -4.027772082 | -1.253654199 | 0.685552862  |

|   |              |              |              |
|---|--------------|--------------|--------------|
| H | -6.993430889 | 1.768959341  | -0.207086911 |
| H | -6.734475674 | -0.871109399 | 0.497666144  |
| C | 0.125263419  | 3.732412647  | -0.133482695 |
| C | 1.344817320  | 3.847618948  | 0.554060894  |
| C | -0.310346699 | 4.821231224  | -0.911577382 |
| C | 2.097376315  | 5.009107012  | 0.456416163  |
| C | 0.449384877  | 5.976058840  | -1.007972199 |
| C | 1.659034108  | 6.075534426  | -0.323971567 |
| H | 1.683678057  | 3.037467191  | 1.184443011  |
| H | -1.239410673 | 4.743315927  | -1.465816286 |
| H | 3.033023610  | 5.084534027  | 1.001508807  |
| H | 0.100653871  | 6.798903110  | -1.623724661 |
| H | 2.255283346  | 6.979437061  | -0.398253521 |
| C | 3.381195929  | -1.614574440 | -0.006891831 |
| C | 4.017235983  | -0.583046710 | 0.703419013  |
| C | 4.178894024  | -2.507417080 | -0.746855633 |
| C | 5.398252531  | -0.453800394 | 0.666493818  |
| C | 5.557109636  | -2.369008548 | -0.782585464 |
| C | 6.174697851  | -1.339849071 | -0.075115299 |
| H | 3.428803048  | 0.097434749  | 1.302625383  |
| H | 3.705572222  | -3.297142024 | -1.319971062 |
| H | 5.873237902  | 0.343987888  | 1.228809126  |
| H | 6.151509939  | -3.061792284 | -1.369604115 |
| H | 7.254197848  | -1.230234766 | -0.101908691 |

58

? ES CAM-B3LYP/6-31G(d)

|   |              |              |             |
|---|--------------|--------------|-------------|
| N | -0.676858665 | -1.240095863 | 0.169506147 |
| C | 0.695804396  | -1.151721040 | 0.179808208 |
| C | 1.261021113  | -2.479709126 | 0.059514739 |

|   |              |              |              |
|---|--------------|--------------|--------------|
| C | 0.178131580  | -3.326079113 | -0.077074288 |
| C | -1.010925997 | -2.567667445 | 0.005844416  |
| N | -0.659570979 | 1.241299884  | 0.139312519  |
| C | 0.712396637  | 1.134555302  | 0.120543584  |
| C | 1.292817083  | 2.453465078  | -0.036652466 |
| C | 0.216374955  | 3.312303534  | -0.147243277 |
| C | -0.979837580 | 2.571323726  | -0.034394935 |
| B | -1.590722294 | 0.008317694  | 0.286199873  |
| N | 1.384359281  | -0.012695969 | 0.187146818  |
| F | -2.177449331 | 0.026243299  | 1.563629620  |
| F | -2.563560595 | 0.003476241  | -0.692742899 |
| H | 0.207523761  | -4.403134783 | -0.150199001 |
| H | 0.255886522  | 4.383358625  | -0.277237865 |
| C | 2.708312677  | 2.791361257  | -0.059371930 |
| C | 3.115774163  | 4.115323442  | 0.182613974  |
| C | 3.722948080  | 1.860290498  | -0.324993663 |
| N | 4.376828302  | 4.530044796  | 0.163130677  |
| C | 5.042589194  | 2.284333340  | -0.343641072 |
| C | 5.323414855  | 3.622876153  | -0.099623475 |
| H | 3.468493543  | 0.826395625  | -0.517585875 |
| H | 5.846366810  | 1.586423750  | -0.551358465 |
| H | 6.348470769  | 3.985148718  | -0.113187906 |
| C | 2.673854146  | -2.822812721 | 0.055619167  |
| C | 3.104207872  | -4.027119289 | -0.526974313 |
| C | 3.662394851  | -2.011010153 | 0.629868075  |
| N | 4.366657854  | -4.437920090 | -0.556961584 |
| C | 4.983436422  | -2.429357726 | 0.598192546  |
| C | 5.288707194  | -3.646596968 | 0.000824693  |
| H | 3.388518123  | -1.072971273 | 1.095895560  |

|   |              |              |              |
|---|--------------|--------------|--------------|
| H | 5.768793288  | -1.824727167 | 1.038351762  |
| H | 6.315124083  | -4.003536230 | -0.033293518 |
| C | -2.346403964 | -3.124660118 | -0.046110756 |
| C | -3.452463457 | -2.551790979 | 0.611026385  |
| C | -2.539707454 | -4.328751882 | -0.756392609 |
| C | -4.695958903 | -3.160240652 | 0.548942845  |
| C | -3.787135396 | -4.924099598 | -0.819454704 |
| C | -4.873153598 | -4.342230651 | -0.166577153 |
| H | -3.321831301 | -1.653193076 | 1.196875978  |
| H | -1.707410672 | -4.776267562 | -1.287945874 |
| H | -5.535049083 | -2.711678164 | 1.071011222  |
| H | -3.916977940 | -5.841941671 | -1.383435496 |
| H | -5.851350654 | -4.810026753 | -0.213523431 |
| C | -2.309695853 | 3.143064262  | -0.092719390 |
| C | -3.421424322 | 2.593274210  | 0.574295139  |
| C | -2.490982676 | 4.338874688  | -0.820112280 |
| C | -4.658018752 | 3.215228910  | 0.505549303  |
| C | -3.731616177 | 4.947519284  | -0.890017230 |
| C | -4.823234196 | 4.388376966  | -0.226822169 |
| H | -3.300770375 | 1.702065183  | 1.173146707  |
| H | -1.655723983 | 4.769369541  | -1.360750413 |
| H | -5.501035580 | 2.783849797  | 1.035732700  |
| H | -3.851588418 | 5.858178681  | -1.467678064 |
| H | -5.796000619 | 4.866816504  | -0.278985461 |
| H | 2.379230696  | -4.679592789 | -1.008196448 |
| H | 2.372359859  | 4.872030281  | 0.421637832  |

58

C5 ES CAM-B3LYP/6-31G(d)

|   |              |              |             |
|---|--------------|--------------|-------------|
| N | -0.677245102 | -1.242638581 | 0.164001539 |
|---|--------------|--------------|-------------|

|   |              |              |              |
|---|--------------|--------------|--------------|
| C | 0.696911906  | -1.148661734 | 0.175257175  |
| C | 1.265969947  | -2.473929029 | 0.048620299  |
| C | 0.187726357  | -3.322183517 | -0.094128928 |
| C | -1.006885057 | -2.567953460 | -0.005718508 |
| N | -0.670177744 | 1.239306965  | 0.144079982  |
| C | 0.704074262  | 1.138170223  | 0.123782028  |
| C | 1.277282238  | 2.459902874  | -0.030990445 |
| C | 0.198455529  | 3.312763939  | -0.140490182 |
| C | -0.997155699 | 2.565167431  | -0.028284679 |
| B | -1.596501291 | 0.001709109  | 0.287867070  |
| N | 1.378574881  | -0.006646440 | 0.186196621  |
| F | -2.180130000 | 0.011647037  | 1.565813318  |
| F | -2.569609139 | -0.002700374 | -0.689996930 |
| H | 0.222007739  | -4.398444579 | -0.176578160 |
| H | 0.233800926  | 4.384467690  | -0.266410451 |
| C | 2.691119739  | 2.815611360  | -0.061410004 |
| C | 3.710750422  | 1.883584436  | -0.298699937 |
| C | 3.090880099  | 4.146209322  | 0.135175174  |
| C | 5.029422037  | 2.315966810  | -0.327953381 |
| C | 4.436544891  | 4.469612865  | 0.084901780  |
| N | 5.410045193  | 3.581655034  | -0.141603593 |
| H | 2.364353296  | 4.923224153  | 0.343393586  |
| H | 5.824867662  | 1.597593968  | -0.514142089 |
| H | 4.750542610  | 5.499381372  | 0.239604947  |
| H | 3.476173408  | 0.841105700  | -0.462772063 |
| C | 2.679773269  | -2.824808571 | 0.051000311  |
| C | 3.665255128  | -1.999029496 | 0.608650438  |
| C | 3.112695574  | -4.042047739 | -0.494444820 |
| C | 4.988404603  | -2.417581431 | 0.589788174  |

|   |              |              |              |
|---|--------------|--------------|--------------|
| C | 4.459746985  | -4.363514922 | -0.459242390 |
| N | 5.401411031  | -3.575479059 | 0.069197025  |
| H | 3.402077581  | -1.049052425 | 1.053970328  |
| H | 2.410795606  | -4.725673867 | -0.958481484 |
| H | 5.758932970  | -1.783017887 | 1.022056871  |
| H | 4.802103382  | -5.304551856 | -0.883635448 |
| C | -2.338312706 | -3.131572046 | -0.058721394 |
| C | -3.448168374 | -2.563830730 | 0.597490127  |
| C | -2.524776523 | -4.336661907 | -0.770121456 |
| C | -4.688454418 | -3.177824116 | 0.533001068  |
| C | -3.769390839 | -4.936770075 | -0.836222828 |
| C | -4.858890038 | -4.359814052 | -0.184426449 |
| H | -3.322278980 | -1.666044050 | 1.185511182  |
| H | -1.689923322 | -4.780531090 | -1.300581013 |
| H | -5.530364012 | -2.734084630 | 1.054503395  |
| H | -3.894621545 | -5.854605359 | -1.401119605 |
| H | -5.834881071 | -4.831946581 | -0.233296218 |
| C | -2.327355726 | 3.133378403  | -0.080840402 |
| C | -3.437064288 | 2.575542528  | 0.583938500  |
| C | -2.512635567 | 4.333582207  | -0.800961171 |
| C | -4.675351434 | 3.193804703  | 0.519589701  |
| C | -3.755269300 | 4.937766389  | -0.867090287 |
| C | -4.844477260 | 4.370571993  | -0.206386747 |
| H | -3.312852486 | 1.681944969  | 1.178419207  |
| H | -1.679260908 | 4.770493656  | -1.339242803 |
| H | -5.516674408 | 2.757145291  | 1.047990218  |
| H | -3.879029825 | 5.851328164  | -1.439208270 |
| H | -5.818822129 | 4.846100395  | -0.255130592 |

## C6 ES CAM-B3LYP/6-31G(d)

|   |              |              |              |
|---|--------------|--------------|--------------|
| N | -0.606759693 | -1.262909974 | 0.143464243  |
| C | 0.763491749  | -1.123342026 | 0.173969076  |
| C | 1.372900640  | -2.431215281 | 0.052087792  |
| C | 0.326768719  | -3.311931591 | -0.122558145 |
| C | -0.890080853 | -2.598615265 | -0.044912865 |
| N | -0.688978285 | 1.215870171  | 0.172826549  |
| C | 0.687561079  | 1.164944618  | 0.135032522  |
| C | 1.204624625  | 2.508414230  | -0.028452111 |
| C | 0.095685196  | 3.323521631  | -0.110958952 |
| C | -1.067014050 | 2.533118166  | 0.014858741  |
| B | -1.568445689 | -0.056116629 | 0.290721805  |
| N | 1.403910517  | 0.043464569  | 0.191503856  |
| F | -2.155125846 | -0.096984686 | 1.568333974  |
| F | -2.542309366 | -0.073808375 | -0.687796007 |
| H | 0.420820956  | -4.380922171 | -0.233428940 |
| H | 0.117745499  | 4.396865371  | -0.215116682 |
| C | 2.592132367  | 2.951987803  | -0.102570203 |
| N | 2.767481858  | 4.289167974  | -0.104238368 |
| C | 3.674058219  | 2.066077566  | -0.186240941 |
| C | 4.004658419  | 4.762797355  | -0.178254954 |
| C | 4.960664296  | 2.581398896  | -0.263043522 |
| C | 5.140038005  | 3.957622737  | -0.255913981 |
| H | 3.492288104  | 1.000745818  | -0.202691444 |
| H | 4.103360533  | 5.846317861  | -0.175407622 |
| H | 5.811928643  | 1.911390509  | -0.330529274 |
| H | 6.126565158  | 4.403788036  | -0.311958229 |
| C | 2.788307914  | -2.777046446 | 0.090981618  |
| N | 3.091778033  | -4.023568706 | -0.322825925 |



|   |              |              |              |
|---|--------------|--------------|--------------|
| C | 3.769801116  | -1.894745927 | 0.561239850  |
| C | 4.362861092  | -4.404753075 | -0.291514788 |
| C | 5.093453881  | -2.311459569 | 0.584719328  |
| C | 5.406325447  | -3.590891352 | 0.146246702  |
| H | 3.485075609  | -0.910890695 | 0.908337087  |
| H | 4.567549799  | -5.416546294 | -0.635097521 |
| H | 5.868696291  | -1.643823363 | 0.947014573  |
| H | 6.426309726  | -3.958353097 | 0.144930189  |
| C | -2.203218744 | -3.203443153 | -0.126514751 |
| C | -3.340213104 | -2.685863348 | 0.523699302  |
| C | -2.339254520 | -4.400669235 | -0.861296786 |
| C | -4.558549987 | -3.339475325 | 0.429803804  |
| C | -3.562179375 | -5.040832749 | -0.956722795 |
| C | -4.679697905 | -4.512698635 | -0.311406861 |
| H | -3.252613563 | -1.795643353 | 1.129883323  |
| H | -1.481305161 | -4.806944470 | -1.384979434 |
| H | -5.422019786 | -2.933472489 | 0.946942875  |
| H | -3.648055666 | -5.952080390 | -1.539499170 |
| H | -5.638682838 | -5.015781403 | -0.383471863 |
| C | -2.419124242 | 3.051510370  | -0.009831538 |
| C | -3.499473707 | 2.442500070  | 0.657645525  |
| C | -2.657158302 | 4.256901476  | -0.704816184 |
| C | -4.760244181 | 3.016616094  | 0.619861021  |
| C | -3.921366127 | 4.817581594  | -0.744079702 |
| C | -4.981240019 | 4.199616107  | -0.081387516 |
| H | -3.336118913 | 1.542216971  | 1.232214868  |
| H | -1.845663049 | 4.734028031  | -1.242300288 |
| H | -5.578507129 | 2.539619966  | 1.149776075  |
| H | -4.084690996 | 5.736967510  | -1.296773768 |

|                          |              |              |              |
|--------------------------|--------------|--------------|--------------|
| H                        | -5.972671048 | 4.640315762  | -0.109420045 |
| 40                       |              |              |              |
| C7 ES CAM-B3LYP/6-31G(d) |              |              |              |
| N                        | 1.172113091  | 0.128577010  | 1.240820095  |
| C                        | 2.558353195  | 0.111529009  | 1.139642087  |
| C                        | 3.117988240  | -0.031872002 | 2.444086189  |
| C                        | 2.067068159  | -0.145519011 | 3.311004250  |
| C                        | 0.850542063  | -0.034712003 | 2.562375196  |
| N                        | 1.172113091  | 0.128577010  | -1.240820095 |
| C                        | 2.558353195  | 0.111529009  | -1.139642087 |
| C                        | 3.117988240  | -0.031872002 | -2.444086189 |
| C                        | 2.067068159  | -0.145519011 | -3.311004250 |
| C                        | 0.850542063  | -0.034712003 | -2.562375196 |
| B                        | 0.251427019  | 0.262218020  | 0.000000000  |
| N                        | 3.246559246  | 0.143255011  | 0.000000000  |
| F                        | -0.339046026 | 1.539901117  | 0.000000000  |
| F                        | -0.725164055 | -0.715521053 | 0.000000000  |
| H                        | 2.118552163  | -0.251909019 | 4.384819334  |
| H                        | 2.118552163  | -0.251909019 | -4.384819334 |
| C                        | -0.470141036 | -0.068484005 | -3.145300242 |
| C                        | -1.592030124 | 0.566574041  | -2.572740196 |
| C                        | -0.643822050 | -0.744247059 | -4.374789335 |
| C                        | -2.825324218 | 0.513627039  | -3.201197246 |
| C                        | -1.881444141 | -0.797868061 | -4.989420380 |
| C                        | -2.981360226 | -0.169480013 | -4.405478334 |
| H                        | -1.478615115 | 1.131700084  | -1.659003125 |
| H                        | 0.196113015  | -1.258408094 | -4.827720371 |
| H                        | -3.674078280 | 1.018467080  | -2.750887209 |
| H                        | -1.993522152 | -1.335526100 | -5.925304445 |

|   |              |              |              |
|---|--------------|--------------|--------------|
| H | -3.952150304 | -0.209059016 | -4.889151372 |
| C | -0.470141036 | -0.068484005 | 3.145300242  |
| C | -0.643822050 | -0.744247059 | 4.374789335  |
| C | -1.592030124 | 0.566574041  | 2.572740196  |
| C | -1.881444141 | -0.797868061 | 4.989420380  |
| C | -2.825324218 | 0.513627039  | 3.201197246  |
| C | -2.981360226 | -0.169480013 | 4.405478334  |
| H | 0.196113015  | -1.258408094 | 4.827720371  |
| H | -1.478615115 | 1.131700084  | 1.659003125  |
| H | -1.993522152 | -1.335526100 | 5.925304445  |
| H | -3.674078280 | 1.018467080  | 2.750887209  |
| H | -3.952150304 | -0.209059016 | 4.889151372  |
| H | 4.177348318  | -0.059231005 | 2.653270204  |
| H | 4.177348318  | -0.059231005 | -2.653270204 |

40

D1 ES CAM-B3LYP/6-31G(d)

|   |              |              |             |
|---|--------------|--------------|-------------|
| N | 0.005906637  | 1.214351702  | 2.272842516 |
| C | -0.011625314 | 1.144030628  | 0.909308699 |
| C | 0.000000000  | 2.503146085  | 0.381382306 |
| C | 0.040388980  | 3.340826584  | 1.516372452 |
| C | 0.035626727  | 2.535688168  | 2.632512084 |
| N | -0.005906637 | -1.214351702 | 2.272842516 |
| C | 0.011625314  | -1.144030628 | 0.909308699 |
| C | 0.000000000  | -2.503146085 | 0.381382306 |
| C | -0.040388980 | -3.340826584 | 1.516372452 |
| C | -0.035626727 | -2.535688168 | 2.632512084 |
| B | 0.000000000  | 0.000000000  | 3.225716959 |
| N | 0.000000000  | 0.000000000  | 0.216320088 |
| F | -1.135051353 | 0.003002671  | 4.023918883 |

|   |              |              |              |
|---|--------------|--------------|--------------|
| F | 1.135051353  | -0.003002671 | 4.023918883  |
| C | -0.023277170 | 2.903046830  | -1.000040430 |
| H | 0.041445421  | 4.420403514  | 1.529433716  |
| H | -0.041445421 | -4.420403514 | 1.529433716  |
| C | 0.023277170  | -2.903046830 | -1.000040430 |
| C | -0.356155354 | 2.420061637  | -3.361409807 |
| C | -0.326569519 | 1.997102412  | -2.042659149 |
| C | 0.216965290  | 4.659129156  | -2.668507302 |
| C | 0.356155354  | -2.420061637 | -3.361409807 |
| C | -0.083005670 | 3.747453653  | -3.684172416 |
| C | 0.244089362  | 4.247991560  | -1.350224379 |
| C | 0.326569519  | -1.997102412 | -2.042659149 |
| C | 0.083005670  | -3.747453653 | -3.684172416 |
| H | -0.102840103 | 4.073271763  | -4.719222826 |
| H | 0.550566408  | -0.968740448 | -1.794649193 |
| H | 0.102840103  | -4.073271763 | -4.719222826 |
| H | 0.432652392  | 5.693917036  | -2.914172236 |
| H | 0.597127566  | -1.709429399 | -4.145657829 |
| H | 0.491607089  | 4.964059978  | -0.574796974 |
| C | -0.244089362 | -4.247991560 | -1.350224379 |
| C | -0.216965290 | -4.659129156 | -2.668507302 |
| H | -0.597127566 | 1.709429399  | -4.145657829 |
| H | -0.550566408 | 0.968740448  | -1.794649193 |
| H | -0.491607089 | -4.964059978 | -0.574796974 |
| H | -0.432652392 | -5.693917036 | -2.914172236 |
| H | 0.044998481  | 2.814629471  | 3.677112715  |
| H | -0.044998481 | -2.814629471 | 3.677112715  |

34

D2 ES CAM-B3LYP/6-31G(d)

|   |              |              |              |
|---|--------------|--------------|--------------|
| N | 0.002447709  | 1.214430623  | 2.189907063  |
| C | -0.019671317 | 1.138722028  | 0.827289062  |
| C | -0.034369163 | 2.490823320  | 0.302081692  |
| C | 0.000000000  | 3.341730308  | 1.433556641  |
| C | 0.015555043  | 2.539786932  | 2.547695194  |
| N | -0.002447709 | -1.214430623 | 2.189907063  |
| C | 0.019671317  | -1.138722028 | 0.827289062  |
| C | 0.034369163  | -2.490823320 | 0.302081692  |
| C | 0.000000000  | -3.341730308 | 1.433556641  |
| C | -0.015555043 | -2.539786932 | 2.547695194  |
| B | 0.000000000  | 0.000000000  | 3.143373418  |
| N | 0.000000000  | 0.000000000  | 0.127656721  |
| F | -1.134915434 | 0.001079409  | 3.942538434  |
| F | 1.134915434  | -0.001079409 | 3.942538434  |
| H | -0.005829002 | 4.422351368  | 1.431763381  |
| H | 0.005829002  | -4.422351368 | 1.431763381  |
| C | 0.085008332  | -2.847089902 | -1.068103398 |
| S | -0.078194770 | -4.518586648 | -1.572170033 |
| C | 0.277198992  | -2.031092351 | -2.180708047 |
| C | 0.109118909  | -4.091347871 | -3.224220520 |
| C | 0.290490066  | -2.742179041 | -3.395513735 |
| H | 0.428030423  | -0.965716279 | -2.084956170 |
| H | 0.072999914  | -4.856075550 | -3.988248897 |
| H | 0.431482170  | -2.281006011 | -4.365331868 |
| C | -0.085008332 | 2.847089902  | -1.068103398 |
| S | 0.078194770  | 4.518586648  | -1.572170033 |
| C | -0.277198992 | 2.031092351  | -2.180708047 |
| C | -0.109118909 | 4.091347871  | -3.224220520 |
| C | -0.290490066 | 2.742179041  | -3.395513735 |

|   |              |              |              |
|---|--------------|--------------|--------------|
| H | -0.428030423 | 0.965716279  | -2.084956170 |
| H | -0.072999914 | 4.856075550  | -3.988248897 |
| H | -0.431482170 | 2.281006011  | -4.365331868 |
| H | 0.030525791  | 2.819906628  | 3.591605318  |
| H | -0.030525791 | -2.819906628 | 3.591605318  |

34

D3 ES CAM-B3LYP/6-31G(d)

|   |              |              |              |
|---|--------------|--------------|--------------|
| N | -0.020155140 | 1.214972522  | -1.970975386 |
| C | 0.001419366  | 1.136743916  | -0.607723240 |
| C | 0.000000000  | 2.483282417  | -0.086649625 |
| C | -0.040927003 | 3.342782281  | -1.208511458 |
| C | -0.047289455 | 2.541794778  | -2.325360484 |
| N | 0.020155140  | -1.214972522 | -1.970975386 |
| C | -0.001419366 | -1.136743916 | -0.607723240 |
| C | 0.000000000  | -2.483282417 | -0.086649625 |
| C | 0.040927003  | -3.342782281 | -1.208511458 |
| C | 0.047289455  | -2.541794778 | -2.325360484 |
| B | 0.000000000  | 0.000000000  | -2.924437079 |
| N | 0.000000000  | 0.000000000  | 0.096417741  |
| F | 1.134826881  | 0.018226159  | -3.723953347 |
| F | -1.134826881 | -0.018226159 | -3.723953347 |
| H | -0.051870599 | 4.422143581  | -1.191166631 |
| H | 0.051870599  | -4.422143581 | -1.191166631 |
| C | -0.050499707 | -2.830191383 | 1.278980415  |
| O | 0.041561976  | -4.159807204 | 1.595753151  |
| C | -0.201026810 | -2.100002510 | 2.447827716  |
| C | -0.046530944 | -4.260772815 | 2.937447161  |
| C | -0.197760730 | -3.029364069 | 3.510144121  |
| H | -0.324748696 | -1.030339569 | 2.495172294  |

|   |              |              |              |
|---|--------------|--------------|--------------|
| H | 0.015682973  | -5.259582315 | 3.342056408  |
| H | -0.296182659 | -2.823036341 | 4.565689127  |
| C | 0.050499707  | 2.830191383  | 1.278980415  |
| O | -0.041561976 | 4.159807204  | 1.595753151  |
| C | 0.201026810  | 2.100002510  | 2.447827716  |
| C | 0.046530944  | 4.260772815  | 2.937447161  |
| C | 0.197760730  | 3.029364069  | 3.510144121  |
| H | 0.324748696  | 1.030339569  | 2.495172294  |
| H | -0.015682973 | 5.259582315  | 3.342056408  |
| H | 0.296182659  | 2.823036341  | 4.565689127  |
| H | -0.066642159 | 2.823846823  | -3.368665584 |
| H | 0.066642159  | -2.823846823 | -3.368665584 |

38

D4 ES CAM-B3LYP/6-31G(d)

|   |              |              |             |
|---|--------------|--------------|-------------|
| N | 0.006666001  | 1.214841095  | 2.264797175 |
| C | -0.011222001 | 1.142282089  | 0.900984069 |
| C | 0.000000000  | 2.502192190  | 0.370698028 |
| C | 0.040111003  | 3.340969256  | 1.498382113 |
| C | 0.036503003  | 2.534616192  | 2.619067198 |
| N | -0.006666001 | -1.214841095 | 2.264797175 |
| C | 0.011222001  | -1.142282089 | 0.900984069 |
| C | 0.000000000  | -2.502192190 | 0.370698028 |
| C | -0.040111003 | -3.340969256 | 1.498382113 |
| C | -0.036503003 | -2.534616192 | 2.619067198 |
| B | 0.000000000  | 0.000000000  | 3.221469248 |
| N | 0.000000000  | 0.000000000  | 0.206069015 |
| F | -1.135356085 | 0.003680000  | 4.015031309 |
| F | 1.135356085  | -0.003680000 | 4.015031309 |
| H | 0.038735003  | 4.420574337  | 1.511205115 |

|   |              |              |              |
|---|--------------|--------------|--------------|
| H | -0.038735003 | -4.420574337 | 1.511205115  |
| C | 0.020773002  | -2.885496222 | -1.015139079 |
| C | -0.286353022 | -4.215054324 | -1.387075108 |
| C | 0.349612027  | -2.000982154 | -2.061210156 |
| N | -0.280247022 | -4.664973358 | -2.631851200 |
| C | 0.356630027  | -2.467558190 | -3.363615259 |
| C | 0.039165003  | -3.800216292 | -3.604116275 |
| H | 0.606124045  | -0.974739074 | -1.834837141 |
| H | 0.612297046  | -1.811088137 | -4.187933318 |
| H | 0.041034003  | -4.194956321 | -4.616902351 |
| H | -0.567133043 | -4.934991378 | -0.622803045 |
| C | -0.020773002 | 2.885496222  | -1.015139079 |
| C | 0.286353022  | 4.215054324  | -1.387075108 |
| C | -0.349612027 | 2.000982154  | -2.061210156 |
| N | 0.280247022  | 4.664973358  | -2.631851200 |
| C | -0.356630027 | 2.467558190  | -3.363615259 |
| C | -0.039165003 | 3.800216292  | -3.604116275 |
| H | 0.567133043  | 4.934991378  | -0.622803045 |
| H | -0.606124045 | 0.974739074  | -1.834837141 |
| H | -0.612297046 | 1.811088137  | -4.187933318 |
| H | -0.041034003 | 4.194956321  | -4.616902351 |
| H | 0.045808004  | 2.818093217  | 3.662597282  |
| H | -0.045808004 | -2.818093217 | 3.662597282  |

38

D5 ES CAM-B3LYP/6-31G(d)

|   |              |             |             |
|---|--------------|-------------|-------------|
| N | 0.007572001  | 1.215327092 | 2.282055174 |
| C | -0.010509001 | 1.141837088 | 0.911807072 |
| C | 0.000000000  | 2.504144193 | 0.380029029 |
| C | 0.039178003  | 3.337578256 | 1.499635115 |



|   |              |              |              |
|---|--------------|--------------|--------------|
| C | 0.036541003  | 2.527752192  | 2.629619199  |
| N | -0.007572001 | -1.215327092 | 2.282055174  |
| C | 0.010509001  | -1.141837088 | 0.911807072  |
| C | 0.000000000  | -2.504144193 | 0.380029029  |
| C | -0.039178003 | -3.337578256 | 1.499635115  |
| C | -0.036541003 | -2.527752192 | 2.629619199  |
| B | 0.000000000  | 0.000000000  | 3.242473246  |
| N | 0.000000000  | 0.000000000  | 0.220173017  |
| F | -1.135498084 | 0.004726000  | 4.031664308  |
| F | 1.135498084  | -0.004726000 | 4.031664308  |
| H | 0.040641003  | 4.417303339  | 1.513065115  |
| H | -0.040641003 | -4.417303339 | 1.513065115  |
| C | 0.021205002  | -2.894055219 | -1.011463075 |
| C | -0.275232021 | -4.217503320 | -1.388101103 |
| C | 0.351041027  | -2.005220155 | -2.049706155 |
| C | -0.234036018 | -4.570197347 | -2.724711207 |
| C | 0.364431028  | -2.467863187 | -3.357669254 |
| N | 0.077680006  | -3.722101285 | -3.712488283 |
| H | 0.604047045  | -0.976635074 | -1.833978138 |
| H | -0.467015036 | -5.589718437 | -3.022392233 |
| H | 0.622054048  | -1.786655134 | -4.165428320 |
| H | -0.551956044 | -4.959565380 | -0.648462051 |
| C | -0.021205002 | 2.894055219  | -1.011463075 |
| C | 0.275232021  | 4.217503320  | -1.388101103 |
| C | -0.351041027 | 2.005220155  | -2.049706155 |
| C | 0.234036018  | 4.570197347  | -2.724711207 |
| C | -0.364431028 | 2.467863187  | -3.357669254 |
| N | -0.077680006 | 3.722101285  | -3.712488283 |
| H | 0.551956044  | 4.959565380  | -0.648462051 |

|   |              |              |              |
|---|--------------|--------------|--------------|
| H | -0.604047045 | 0.976635074  | -1.833978138 |
| H | 0.467015036  | 5.589718437  | -3.022392233 |
| H | -0.622054048 | 1.786655134  | -4.165428320 |
| H | 0.047987004  | 2.817537216  | 3.671805279  |
| H | -0.047987004 | -2.817537216 | 3.671805279  |

38

D6 ES CAM-B3LYP/6-31G(d)

|   |              |              |              |
|---|--------------|--------------|--------------|
| N | 0.018435001  | 1.214548095  | 2.241958170  |
| C | -0.005774000 | 1.143019085  | 0.875855066  |
| C | 0.000000000  | 2.506255192  | 0.353693027  |
| C | 0.049733004  | 3.342108257  | 1.475982114  |
| C | 0.052548004  | 2.532852196  | 2.597398199  |
| N | -0.018435001 | -1.214548095 | 2.241958170  |
| C | 0.005774000  | -1.143019085 | 0.875855066  |
| C | 0.000000000  | -2.506255192 | 0.353693027  |
| C | -0.049733004 | -3.342108257 | 1.475982114  |
| C | -0.052548004 | -2.532852196 | 2.597398199  |
| B | 0.000000000  | 0.000000000  | 3.198338244  |
| N | 0.000000000  | 0.000000000  | 0.182134014  |
| F | -1.135210085 | 0.015759001  | 3.992114304  |
| F | 1.135210085  | -0.015759001 | 3.992114304  |
| H | 0.067420005  | 4.420459337  | 1.461163114  |
| H | -0.067420005 | -4.420459337 | 1.461163114  |
| C | 0.042264003  | -2.935740226 | -1.022152080 |
| N | -0.117379009 | -4.265464326 | -1.225035092 |
| C | 0.257292020  | -2.046265159 | -2.090467160 |
| C | -0.080663006 | -4.717785358 | -2.467029187 |
| C | 0.294209023  | -2.543488193 | -3.385249258 |
| C | 0.117658009  | -3.904185297 | -3.588278275 |

|   |              |              |              |
|---|--------------|--------------|--------------|
| H | 0.404664031  | -0.995197077 | -1.886080142 |
| H | -0.215114016 | -5.790061451 | -2.592264196 |
| H | 0.461639035  | -1.873737146 | -4.222424324 |
| H | 0.135287010  | -4.338221329 | -4.581568350 |
| C | -0.042264003 | 2.935740226  | -1.022152080 |
| N | 0.117379009  | 4.265464326  | -1.225035092 |
| C | -0.257292020 | 2.046265159  | -2.090467160 |
| C | 0.080663006  | 4.717785358  | -2.467029187 |
| C | -0.294209023 | 2.543488193  | -3.385249258 |
| C | -0.117658009 | 3.904185297  | -3.588278275 |
| H | -0.404664031 | 0.995197077  | -1.886080142 |
| H | 0.215114016  | 5.790061451  | -2.592264196 |
| H | -0.461639035 | 1.873737146  | -4.222424324 |
| H | -0.135287010 | 4.338221329  | -4.581568350 |
| H | 0.073448006  | 2.813064213  | 3.641855280  |
| H | -0.073448006 | -2.813064213 | 3.641855280  |

20

D7 ES CAM-B3LYP/6-31G(d)

|   |             |              |              |
|---|-------------|--------------|--------------|
| N | 0.000000000 | 1.212355772  | -0.299237700 |
| C | 0.000000000 | 1.137737271  | 1.111959598  |
| C | 0.000000000 | 2.464597475  | 1.624562539  |
| C | 0.000000000 | 3.314333378  | 0.537476913  |
| C | 0.000000000 | 2.504135821  | -0.631563871 |
| N | 0.000000000 | -1.212355772 | -0.299237700 |
| C | 0.000000000 | -1.137737271 | 1.111959598  |
| C | 0.000000000 | -2.464597475 | 1.624562539  |
| C | 0.000000000 | -3.314333378 | 0.537476913  |
| C | 0.000000000 | -2.504135821 | -0.631563871 |
| B | 0.000000000 | 0.000000000  | -1.261076719 |

|   |              |              |              |
|---|--------------|--------------|--------------|
| N | 0.000000000  | 0.000000000  | 1.810390221  |
| F | 1.134437126  | 0.000000000  | -2.054930616 |
| F | -1.134437126 | 0.000000000  | -2.054930616 |
| H | 0.000000000  | 2.711717424  | 2.676017555  |
| H | 0.000000000  | 4.395275929  | 0.542847347  |
| H | 0.000000000  | 2.815058761  | -1.668110509 |
| H | 0.000000000  | -2.711717424 | 2.676017555  |
| H | 0.000000000  | -4.395275929 | 0.542847347  |
| H | 0.000000000  | -2.815058761 | -1.668110509 |
